# Supplementary material
Source: PubMed Central journal article supplement (PMC5391758)
Supplement: 10.1074_M117.775023_jbc.M117.775023-1.pdf [file 10.1074_M117.775023_jbc.M117.775023-1.pdf]

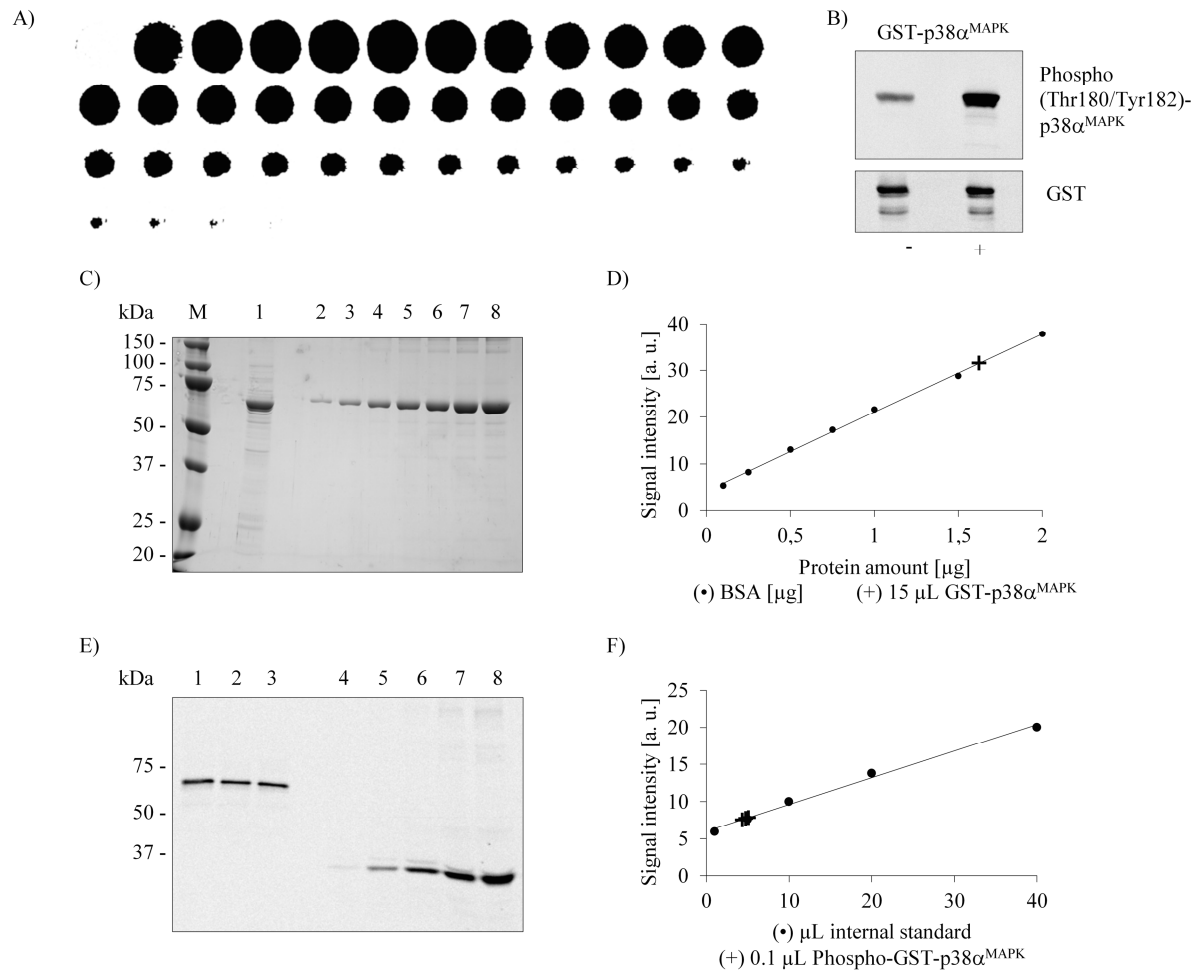

### Supplementary Figure S1: Determination of hepatocyte cell volume and generation of an internal standard for quantitative immunoblotting

**A) Determination of hepatocyte cell volume.** Optical slices obtained from fluorescence microscopy were binarised using ImageJ Software. The amount of black pixels was calculated and multiplied by a device dependent scaling factor to receive hepatocyte cell volume. This method was validated by measurements on fluorescent microspheres of known size.

**B) *In vitro* phosphorylation of recombinant p38<sup>MAPK</sup>.** p38<sup>MAPK</sup> and MK2 (not shown) was recombinantly expressed in *E. coli*, purified by affinity chromatography using Glutathion S Sepharose (GE Healthcare) and *in vitro* phosphorylated as described above. Protein was then applied to SDS-PAGE, transferred to nitrocellulose membrane by western blotting and detected by specific antibodies. (-) Protein without *in vitro* phosphorylation, (+) protein after *in vitro* phosphorylation.

**C and D) Determination of p38<sup>MAPK</sup> protein concentration in solution.** *In vitro* phosphorylated p38<sup>MAPK</sup> and MK2 (not shown) was applied to SDS-PAGE, co-separated with a serial dilution of BSA. After staining with Coomassie Brilliant Blue staining intensity was calculated to determine the concentration of p38<sup>MAPK</sup> and MK2 (not shown) in solution.

**E and F) Calibration of the internal standard.** Primary mouse hepatocytes were treated for 20 minutes with 20 ng·mL<sup>-1</sup> of IL-1 $\beta$  and lysed in triton buffer. The lysate was applied to SDS-PAGE and Western Blotting as a serial dilution together with the *in vitro* phosphorylated protein. Signal intensity was calculated to determine the concentration of Phospho-p38<sup>MAPK</sup>, total p38<sup>MAPK</sup> (not shown), Phospho-MK2 (not shown) and total MK2 (not shown), respectively.

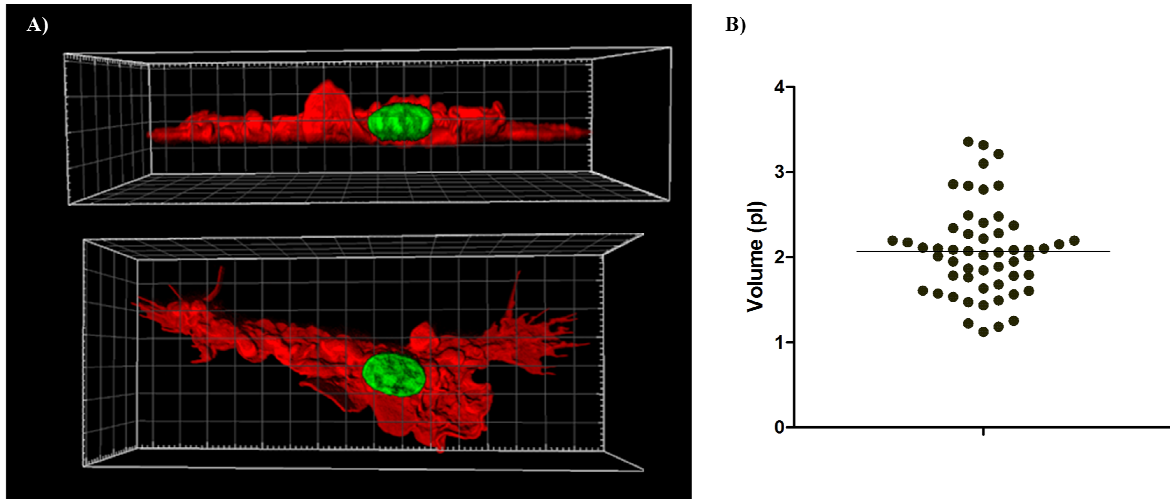

### Supplementary Figure S3: Determination of BMDM cell volume

A) Optical slices from a representative measurement on bone marrow derived macrophages (BMDM) obtained from fluorescence microscopy were combined to a 3D illustration with the software Velocity (Improvision). B) Furthermore, optical slices from 54 independent measurements were binarised using ImageJ Software. The amount of black pixels was calculated and multiplied by a device dependent scaling factor to receive BMDM cell volume (2.07 pL, S.E.M.: 0.07).
