# Supplementary material
Source: PubMed Central journal article supplement (PMC5391758)
Supplement: 10.1074_M117.775023_jbc.M117.775023-2.pdf [file 10.1074_M117.775023_jbc.M117.775023-2.pdf]

IL-1 $\beta$  induced and p38<sup>MAPK</sup>-dependent activation of MK2 in  
hepatocytes: signal transduction with robust and concentration  
independent signal amplification

## Supplementary Information s2

Modeling of the Il-1 $\beta$  induced and p38 dependend MK2 activation

### Contents

|          |                                                                            |            |
|----------|----------------------------------------------------------------------------|------------|
| <b>1</b> | <b>Mathematical Modeling</b>                                               | <b>2</b>   |
| 1.1      | Dynamic variables                                                          | 2          |
| 1.2      | Input variables                                                            | 3          |
| 1.3      | Reactions                                                                  | 3          |
| 1.4      | ODE system                                                                 | 4          |
| 1.5      | Scaling invariances                                                        | 5          |
| 1.6      | Initial conditions                                                         | 5          |
| 1.7      | Summary of the model                                                       | 5          |
| 1.8      | Overview of the used calibration experiments                               | 6          |
| <b>2</b> | <b>List of the single Experiments, Model Fits and Tables of Parameters</b> | <b>8</b>   |
| 2.1      | Calibration experiments                                                    | 8          |
| 2.2      | Time course experiments for different IL-1 $\beta$ doses and inhibitors    | 17         |
| 2.3      | Estimated model parameters                                                 | 100        |
| 2.4      | Profile likelihood of model parameters                                     | 105        |
| 2.5      | Confidence intervals for the model parameters                              | 106        |
| 2.6      | Multi-experiment fit without inhibitor experiments                         | 111        |
|          | <b>References</b>                                                          | <b>116</b> |

# 1 Mathematical Modeling

In the following the used mathematical model based on ordinary differential equations (ODE) is described. The model is calibrated by a maximum likelihood estimation using quantitative experimental data obtained by a western blot analysis. To obtain the real units in  $\mu\text{M}$  of p38 and MK2 the immunoblot data were calibrated with an internal standard. The estimation of the unknown calibration parameters of the internal standard and the dynamic ODE parameters was done simultaneously in a single multi-experiment fit. The measurement error of the data is modeled by a error model assuming a constant gaussian error on a logarithmic scale independent for each experiment. The uncertainties in data are leading to uncertainties in the estimated parameter. With the profile likelihood method it is possible to determine the uncertainty in a quantitative manner [2].

To implement the model, the experiments and to perform the maximum likelihood estimation, we used the Data2Dynamics software [3]. With this software it is also possible to perform the profile likelihood method.

The general structure of our ODE model is of the form

$$\frac{dx(t)}{dt} = f(x(t), u(t), p) \quad (1)$$

$$x(t=0) = x_0 \quad (2)$$

$$y(t) = g(x(t), s) \quad (3)$$

Equation (1) is the ODE describing the time evolution of the vector of the dynamic variables  $x(t) \in \mathbb{R}^{n_x}$  with the initial conditions  $x_0 \in \mathbb{R}^{n_x}$ . The ODE can depend on external inputs  $u(t) \in \mathbb{R}^{n_u}$  describing i.e. the addition of the activating cytokine or inhibitors by the experimenter. The ODE also depends on a set of dynamic parameters  $p \in \mathbb{R}^{n_p}$  like chemical reaction rate constants. The internal variables  $x(t)$  are linked to the measured output  $y(t) \in \mathbb{R}^{n_y}$  by the observation function  $g(x(t), s)$  depending on the calibration parameters  $s \in \mathbb{R}^{n_s}$ . The vector of all model parameters  $\theta = (p, x_0, s)$  is in general not known and has to be estimated from experimental data.

## 1.1 Dynamic variables

Our ODE model contains 5 dynamic variables:

- **Dynamic variable 1:** p38

$$[\text{p38}](t=0) = \text{init\_p38} \quad (4)$$

Unit: conc. [ $\mu\text{Mol/L}$ ]

- **Dynamic variable 2:** pp38

$$[\text{pp38}](t=0) = \text{init\_pp38} \quad (5)$$

Unit: conc. [ $\mu\text{Mol/L}$ ]

- **Dynamic variable 3:** MKP

$$[\text{MKP}](t=0) = \text{init\_MKP} \quad (6)$$

Unit: conc. [a.u.] – not accessible

- **Dynamic variable 4:** MK2

$$[\text{MK2}](t=0) = \text{init\_MK2} \quad (7)$$

Unit: conc. [ $\mu\text{Mol/L}$ ]

- **Dynamic variable 5:** pMK2

$$[\text{pMK2}](t=0) = \text{init\_pMK2} \quad (8)$$

Unit: conc. [ $\mu\text{Mol/L}$ ]

## 1.2 Input variables

The model contains 3 external inputs variables:

- **Input variable 1: IL1b**

$$[\text{IL1b}](t) = \text{input\_il1b} \quad (9)$$

Unit: conc. [ng/mL]

The p38-MK2 pathway is activated by the addition of different concentrations of IL-1 $\beta$ . This concentration is implemented by the parameter *input\_il1b* which is set for each condition in each experiment.

- **Input variable 2: SB203580**

$$[\text{SB203580}](t) = \text{input\_sb203580} \quad (10)$$

Unit: conc. [ $\mu$ M]

In some experiments we added different concentrations of SB203580 to inhibit the phosphorylation of MK2. This is modeled by the parameter *input\_sb203580*.

- **Input variable 3: PhosphaInh**

$$[\text{PhosphaInh}](t) = \text{input\_phosphaInh} \quad (11)$$

Unit: conc. [ $\mu$ M]

Additionally we performed experiments where we inhibited all phosphatases of the system. This is described by the external input PhosphoInh which is defined by the parameter *input\_phosphaInh*.

- **Input variable 3: MK2\_knockout**

$$[\text{MK2\_knockout}](t) = \text{mk2\_ko} \quad (12)$$

Unit: bool. [1]

To better characterize the system we performed experiments with MK2 knockout mice. This is modeled by the parameter *mk2\_ko* which is set to zero for wild type mice and to one for MK2 knockout mice.

Unless stated otherwise we use for the external input:

$$\text{input\_il1b} = 0 \quad (13)$$

$$\text{input\_phosphaInh} = 0 \quad (14)$$

$$\text{input\_sb203580} = 0 \quad (15)$$

$$\text{mk2\_ko} = 0 \quad (16)$$

## 1.3 Reactions

The model contains 6 reactions, see also Figure 2 in the main part of this article:

- **Reaction 1:**



$$R_1 = [\text{p38}] \cdot \text{p38\_act\_basal} + \frac{[\text{IL1b}] \cdot [\text{p38}] \cdot \text{p38\_act\_il1b}}{[\text{IL1b}] \cdot \text{il1b\_sat} + 1} \quad (17)$$

- **Reaction 2:**



$$R_2 = \frac{\text{p38\_dea\_const} \cdot [\text{pp38}]}{[\text{PhosphaInh}] \cdot \text{dePhospho\_inh} + 1} + \frac{[\text{MKP}] \cdot \text{p38\_dea\_mkp} \cdot [\text{pp38}]}{[\text{PhosphaInh}] \cdot \text{dePhospho\_inh} + 1} \quad (18)$$

- **Reaction 3:**



$$R_3 = \text{mkp\_prod\_pp38} \cdot [\text{pp38}] \quad (19)$$

- **Reaction 4:**



$$R_4 = [\text{MKP}] \cdot \text{mkp\_deg} \quad (20)$$

- **Reaction 5:**



$$R_5 = - \frac{[\text{MK2}] \cdot \text{mk2\_act\_p38} \cdot [\text{pp38}] \cdot (\text{MK2\_knockout} - 1)}{[\text{SB203580}] \cdot \text{mk2\_inh\_sb} + 1} \quad (21)$$

- **Reaction 6:**



$$R_6 = \frac{\text{mk2\_dea} \cdot [\text{pMK2}]}{[\text{PhosphaInh}] \cdot \text{dePhospho\_inh} + 1} \quad (22)$$

## 1.4 ODE system

The ODE system determining the time evolution of the dynamical variables is given by:

$$d[\text{p38}]/dt = -R_1 + R_2 \quad (23)$$

$$d[\text{pp38}]/dt = +R_1 - R_2 \quad (24)$$

$$d[\text{MKP}]/dt = +R_3 - R_4 \quad (25)$$

$$d[\text{MK2}]/dt = -R_5 + R_6 \quad (26)$$

$$d[\text{pMK2}]/dt = +R_5 - R_6 \quad (27)$$

The ODE system was solved by a parallelized implementation of the CVODES algorithm [1]. It also supplies the parameter sensitivities utilized for parameter estimation.

## 1.5 Scaling invariances

Since MKP is not measured the concentration unit of MKP is not accessible. Mathematically this is a scaling invariance of the concentration of MKP. A transformation of the unit of MKP by a factor  $\alpha$

$$([\text{MKP}], \text{mkp\_prod\_pp38}, \text{p38\_dea\_mkp}) \rightarrow (\alpha [\text{MKP}], \alpha \text{mkp\_prod\_pp38}, \alpha^{-1} \text{p38\_dea\_mkp}) \quad (28)$$

does not change the output of the ODE system. This leads to a structural nonidentifiability of the parameters  $\text{mkp\_prod\_pp38}$  and  $\text{p38\_dea\_mkp}$ . In other words, the model for the given data is over-parameterized and we can reduce it, e.g. by fixing the parameter  $\text{mkp\_prod\_pp38}$  to the value of the parameter  $\text{mkp\_deg}$ . With this transformation the numerical value of the initial concentration of MKP equals the initial concentration of pp38.

## 1.6 Initial conditions

Before treatment with IL-1 $\beta$  we can assume the cells to be in a stable steady state. Therefore we calculated the steady state of the system without IL-1 $\beta$  input and used this steady state as initial concentrations for the simulation of the ODE system. By setting eq. (23)–(27) to zero and solving them for

$$\text{input\_il1b} = \text{input\_phosphaInh} = \text{input\_sb203580} = \text{mk2\_ko} = 0 \quad (29)$$

we obtain for the steady state concentrations at timepoint 0:

$$\text{init\_MKP} =$$

$$\frac{\text{mkp\_prod\_pp38} \cdot \text{p38\_dea\_const} - \sqrt{\text{mkp\_prod\_pp38}^2 \cdot \text{p38\_dea\_const}^2 + 4 \cdot \text{init\_p38} \cdot \text{p38\_act\_basal} \cdot \text{p38\_dea\_mkp} \cdot \text{mkp\_prod\_pp38}^2}}{2 \cdot \text{mkp\_prod\_pp38} \cdot \text{p38\_dea\_mkp}} \quad (30)$$

$$\text{init\_pMK2} = -\text{init\_MK2} \cdot \text{mk2\_act\_p38} \cdot$$

$$\left( \frac{\text{mkp\_prod\_pp38} \cdot \text{p38\_dea\_const} - \sqrt{\text{mkp\_prod\_pp38}^2 \cdot \text{p38\_dea\_const}^2 + 4 \cdot \text{init\_p38} \cdot \text{p38\_act\_basal} \cdot \text{p38\_dea\_mkp} \cdot \text{mkp\_prod\_pp38}^2}}{2 \cdot \text{mk2\_dea} \cdot \text{mkp\_prod\_pp38} \cdot \text{p38\_dea\_mkp}} \right) \quad (31)$$

$$\text{init\_pp38} =$$

$$\frac{\text{mkp\_prod\_pp38} \cdot \text{p38\_dea\_const} - \sqrt{\text{mkp\_prod\_pp38}^2 \cdot \text{p38\_dea\_const}^2 + 4 \cdot \text{init\_p38} \cdot \text{p38\_act\_basal} \cdot \text{p38\_dea\_mkp} \cdot \text{mkp\_prod\_pp38}^2}}{2 \cdot \text{mkp\_prod\_pp38} \cdot \text{p38\_dea\_mkp}} \quad (32)$$

The initial values of p38 and MK2 are free parameters which determine the total protein concentration

$$\text{total\_p38} = \text{init\_p38} + \text{init\_pp38} \quad (33)$$

$$\text{total\_MK2} = \text{init\_MK2} + \text{init\_pMK2}. \quad (34)$$

## 1.7 Summary of the model

The final model consists of 5 dynamic variables with 3 input variables and contains 10 dynamic parameters. Three initial concentrations are determined by assuming a steady state at the beginning before IL-1 $\beta$  stimulation. 2 initial concentrations are free parameters and estimated from the experimental data.

## 1.8 Overview of the used calibration experiments

To obtain the unknown model parameters, the model was fitted to experimental data. The results shown in the Figures 3–5 and Figures 7–9 in the main text were obtained by a fit to all measured data, including the inhibitor experiments used for the validation showed in Figure 6 in the main part. The prediction in Figure 6 was done with a parameter set obtained by a fit where the validating inhibitor experiments were not used, see Section 2.6 for tables with the resulting parameter values of this fit.

| experiment | replicates | IL-1 $\beta$ [ng/ml] | inhibitors or knockouts     | observables          | section                |
|------------|------------|----------------------|-----------------------------|----------------------|------------------------|
| 1          | 1          | 1, 2, 5, 10          | none                        | pMK2, pp38           | <a href="#">2.2.7</a>  |
| 1          | 2          | 1, 2, 5, 10          | none                        | pMK2, pp38           | <a href="#">2.2.8</a>  |
| 1          | 3          | 1, 2, 5, 10          | none                        | pMK2, pp38           | <a href="#">2.2.9</a>  |
| 2          | 1          | 0.1, 0.2, 0.5, 1     | none                        | pMK2, pp38           | <a href="#">2.2.10</a> |
| 2          | 2          | 0.1, 0.2, 0.5, 1     | none                        | pMK2, pp38           | <a href="#">2.2.11</a> |
| 2          | 3          | 0.1, 0.2, 0.5, 1     | none                        | pMK2, pp38           | <a href="#">2.2.12</a> |
| 3          | 1          | 0.01, 0.05, 0.1, 0.2 | none                        | pMK2, pp38           | <a href="#">2.2.13</a> |
| 3          | 1          | 0.01, 0.05, 0.1, 0.2 | none                        | pMK2, pp38           | <a href="#">2.2.14</a> |
| 4          | 1          | 0.1, 0.2, 0.5, 1     | none                        | pMK2, pp38           | <a href="#">2.2.15</a> |
| 4          | 2          | 0.1, 0.2, 0.5, 1     | none                        | pMK2, pp38           | <a href="#">2.2.16</a> |
| 4          | 3          | 0.1, 0.2, 0.5, 1     | none                        | pMK2, pp38           | <a href="#">2.2.17</a> |
| 5          | 1          | 0.1, 0.2, 0.5, 1     | MK2.KO                      | pMK2, pp38           | <a href="#">2.2.18</a> |
| 6          | 1          | 0.1, 0.2, 0.5, 1     | MK2.KO                      | pMK2, pp38           | <a href="#">2.2.19</a> |
| 7          | 1          | 0.1, 0.2, 0.5, 1     | MK2.KO                      | pMK2, pp38           | <a href="#">2.2.20</a> |
| 7          | 2          | 0.1, 0.2, 0.5, 1     | MK2.KO                      | pMK2, pp38           | <a href="#">2.2.21</a> |
| 8          | 1          | 10                   | none                        | total MK2, total p38 | <a href="#">2.2.22</a> |
| 9          | 1          | 5                    | none                        | total MK2, total p38 | <a href="#">2.2.23</a> |
| 9          | 2          | 5                    | none                        | total MK2, total p38 | <a href="#">2.2.24</a> |
| 10         | 1          | 1                    | none                        | total MK2, total p38 | <a href="#">2.2.25</a> |
| 11         | 1          | 1                    | sb203580=0, 1, 2, 5 $\mu$ M | pMK2, pp38           | <a href="#">2.2.26</a> |
| 11         | 2          | 1                    | sb203580=0, 1, 2, 5 $\mu$ M | pMK2, pp38           | <a href="#">2.2.27</a> |
| 12         | 1          | 0, 1                 | phosphatase inhibitor       | pMK2, pp38           | <a href="#">2.2.28</a> |
| 13         | 1          | 0, 1                 | phosphatase inhibitor       | pMK2, pp38           | <a href="#">2.2.29</a> |
| 14         | 1          | 0, 1                 | phosphatase inhibitor       | pMK2, pp38           | <a href="#">2.2.30</a> |
| 15         | 1          | 0, 1                 | phosphatase inhibitor       | pMK2, pp38           | <a href="#">2.2.31</a> |
| 16         | 1          | 0, 1                 | phosphatase inhibitor       | pMK2, pp38           | <a href="#">2.2.32</a> |
| 17         | 1          | 20                   | none                        | pMK2                 | <a href="#">2.2.1</a>  |
| 18         | 1          | 5, 10, 20, 40        | none                        | pMK2, pp38           | <a href="#">2.2.2</a>  |
| 18         | 2          | 5, 10, 20, 40        | none                        | pMK2, pp38           | <a href="#">2.2.3</a>  |
| 18         | 3          | 5, 10, 20, 40        | none                        | pMK2, pp38           | <a href="#">2.2.4</a>  |
| 18         | 4          | 5, 10, 20, 40        | none                        | pMK2, pp38           | <a href="#">2.2.5</a>  |
| 18         | 5          | 5, 10, 20, 40        | none                        | pMK2, pp38           | <a href="#">2.2.6</a>  |

**Table 1: List of all the measured time courses used for the model calibrations. The single fits are shown in the Section 2.2.**

Our experimental data consists of 1676 data points. These are 5 measured in 18 independent biological time course experiments and 3 calibrations measurements. The biological experiments were done with 1-3 technical replicates, so that in total 35 measurements were performed. The fit was performed simultaneously to all experiments. An overview of the experimental conditions of the performed experiments is shown in Table 1.

For each experiment we defined an observation function and set the experimental condition by defining the external input variables. We used a lognormal distributed error model. The logarithm of a lognormal distributed variable is normal distributed. For normal distributed data the maximum likelihood estimation is equivalent to the minimization of the sum of squared residuals. Therefore we compared the model simulation and the experimental data on a logarithmic scale with a constant gaussian error. In the following all experiments are described and the fit and the data are shown. The fitted parameters are shown in Section 2.3.

The experiments are falling into two groups. On the one hand we performed calibrator experiments to infer the concentrations in real units in the internal standard. This is done by calibrating the internal standard to a calibrator (Section 2.1.1), this calibrator is calibrated to BSA to obtain absolute amounts of proteins (Section 2.1.2). To obtain concentrations we also measured the volume of the used hepatocytes (Section 2.1.3). On the other hand there are the actual time course experiments which are shown in Section 2.2.

## 2 List of the single Experiments, Model Fits and Tables of Parameters

### 2.1 Calibration experiments

#### 2.1.1 Experiment: Calibration of the internal standard to a calibrator

**Comments** To obtain the concentrations of p38 and MK2 in real units we measured an internal standard in most time course experiments. In this experiment this internal standard is calibrated to a calibrator. This was done for p38\_total, pp38, MK2\_total and pMK2.

A calibration curve with the intensity of different amounts internal standard was measured (see Section 2.1.1). On the same gel the intensity of a given volume of calibrator was measured and fitted simultaneously (see Section 2.1.1). By this one can compare the amount of internal standard with the amount of calibrator. This is done by the parameters:

- $\text{intstd\_in\_p38\_total\_calibrator}$
- $\text{intstd\_in\_pp38\_calibrator}$
- $\text{intstd\_in\_MK2\_total\_calibrator}$
- $\text{intstd\_in\_pMK2\_calibrator}$

E.g. corresponds 1  $\mu\text{L}$  pp38 calibrator to  $\text{intstd\_in\_pp38\_calibrator}$   $\mu\text{L}$  pp38 internal standard.

**Internal standard calibration curve** The calibration curves of the internal standard are defined as

$$Y_{\text{cal\_intstd\_MK2\_total}} = \text{offset\_cal\_intstd\_MK2\_total} + \text{scale\_cal\_intstd\_MK2\_total} \cdot \text{intstd} \quad (35)$$

$$Y_{\text{cal\_intstd\_pMK2}} = \text{offset\_cal\_intstd\_pMK2} + \text{scale\_cal\_intstd\_pMK2} \cdot \text{intstd} \quad (36)$$

$$Y_{\text{cal\_intstd\_p38\_total}} = \text{offset\_cal\_intstd\_p38\_total} + \text{scale\_cal\_intstd\_p38\_total} \cdot \text{intstd} \quad (37)$$

$$Y_{\text{cal\_intstd\_pp38}} = \text{offset\_cal\_intstd\_pp38} + \text{scale\_cal\_intstd\_pp38} \cdot \text{intstd}, \quad (38)$$

with error models

$$\sigma\{Y_{\text{cal\_intstd\_MK2\_total}}\} = \text{sd\_cal\_intstd\_MK2\_total} \quad (39)$$

$$\sigma\{Y_{\text{cal\_intstd\_pMK2}}\} = \text{sd\_cal\_intstd\_pMK2} \quad (40)$$

$$\sigma\{Y_{\text{cal\_intstd\_p38\_total}}\} = \text{sd\_cal\_intstd\_p38\_total} \quad (41)$$

$$\sigma\{Y_{\text{cal\_intstd\_pp38}}\} = \text{sd\_cal\_intstd\_pp38}. \quad (42)$$

The agreement of the model observables and the experimental data, given in Table 2, yields a value of the objective function  $-2 \log(L) = -76.72$  for 20 data points in this data set. The model observables and the experimental data is show in Figure 1.

**Measurement of the calibrator** On the same gel we measured the intensity of a fixed amount of calibrator. The observation functions are defined as

$$I_{\text{MK2\_total}} = \text{offset\_cal\_intstd\_MK2\_total} + \text{intstd\_in\_MK2\_total\_calibrator} \cdot \text{scale\_cal\_intstd\_MK2\_total} \cdot \text{calibrator} \quad (43)$$

$$I_{\text{pMK2}} = \text{offset\_cal\_intstd\_pMK2} + \text{intstd\_in\_pMK2\_calibrator} \cdot \text{scale\_cal\_intstd\_pMK2} \cdot \text{calibrator} \quad (44)$$

$$I_{\text{p38\_total}} = \text{offset\_cal\_intstd\_p38\_total} + \text{intstd\_in\_p38\_total\_calibrator} \cdot \text{scale\_cal\_intstd\_p38\_total} \cdot \text{calibrator} \quad (45)$$

$$I_{\text{pp38}} = \text{offset\_cal\_intstd\_pp38} + \text{intstd\_in\_pp38\_calibrator} \cdot \text{scale\_cal\_intstd\_pp38} \cdot \text{calibrator}, \quad (46)$$



**Figure 1:** Observables and data for the experiment described in Section 2.1.1. The observables are displayed as solid lines. The error model that describes the measurement noise is indicated by shades.

| intstd<br>[μL] | Y_cal_intstd_MK2_total<br>conc. [a.u.] | Y_cal_intstd_pMK2<br>conc. [a.u.] | Y_cal_intstd_p38_total<br>conc. [a.u.] | Y_cal_intstd_pp38<br>conc. [a.u.] |
|----------------|----------------------------------------|-----------------------------------|----------------------------------------|-----------------------------------|
| 1              | 493985                                 | 561209                            | 348408                                 | 593590                            |
| 5              | 913771                                 | 859077                            | 686710                                 | 761850                            |
| 10             | 1.26721e+06                            | 1.4448e+06                        | 1.12762e+06                            | 1.00044e+06                       |
| 20             | 2.26605e+06                            | 2.48525e+06                       | 1.50164e+06                            | 1.37781e+06                       |
| 40             | 3.63004e+06                            | 4.64937e+06                       | 2.77991e+06                            | 2.00218e+06                       |

**Table 2:** Experimental data for the experiment described in Section 2.1.1.



**Figure 2:** Observables and data for the experiment described in Section 2.1.1. The observables are displayed as solid lines. The error model that describes the measurement noise is indicated by shades.

with error models

$$\sigma\{I_{MK2\_total}\} = sd\_cal\_intstd\_MK2\_total \quad (47)$$

$$\sigma\{I_{pMK2}\} = sd\_cal\_intstd\_pMK2 \quad (48)$$

$$\sigma\{I_{p38\_total}\} = sd\_cal\_intstd\_p38\_total \quad (49)$$

$$\sigma\{I_{pp38}\} = sd\_cal\_intstd\_pp38. \quad (50)$$

The agreement of the model observables and the experimental data, given in Table 3, yields a value of the objective function  $-2\log(L) = -46.0015$  for 12 data points in this data set. The model observables and the experimental data is show in Figure 2.

| calibrator | I_MK2_total  | I_pMK2       | I_p38_total  | I_pp38       |
|------------|--------------|--------------|--------------|--------------|
| [ $\mu$ L] | conc. [a.u.] | conc. [a.u.] | conc. [a.u.] | conc. [a.u.] |
| 0.1        |              |              | 852712       | 784803       |
| 0.1        |              |              | 868880       | 757059       |
| 0.1        |              |              | 883571       | 772847       |
| 2          | 1.11195e+06  | 1.11984e+06  |              |              |
| 2          | 750227       | 895231       |              |              |
| 2          | 1.04461e+06  | 867974       |              |              |

**Table 3: Experimental data for the experiment described in Section 2.1.1.**



**Figure 3:** Observables and data for the experiment described in Section 2.1.2. The observables are displayed as solid lines. The error model that describes the measurement noise is indicated by shades.

### 2.1.2 Calibration of the calibrator to BSA

**Comments** To determine the amount of proteins in the calibrator we measured a BSA calibrator curve by measuring the intensity for different amounts of BSA (see Section 2.1.2). On the same gel the intensity of a given volume of calibrator was measured and fitted simultaneously (see Section 2.1.2). By this one can compare the amount of calibrator in  $\mu\text{L}$  with the amount of BSA in  $\mu\text{g}$ . With the molar mass one can calculate a concentration in  $\mu\text{M}$ . This was done for p38\_total, MK2\_total. The amount of phosphorylated p38 and MK2 in the calibrator was then determined by mass spectroscopy.

**BSA calibration curve** The calibration curves of BSA are defined as

$$Y\_BSA\_MK2\_total = \text{offset\_BSA\_MK2\_total} + \text{scale\_BSA\_MK2\_total} \cdot \text{BSA} \quad (51)$$

$$Y\_BSA\_p38\_total = \text{offset\_BSA\_p38\_total} + \text{scale\_BSA\_p38\_total} \cdot \text{BSA}, \quad (52)$$

with error models

$$\sigma\{Y\_BSA\_MK2\_total\} = \text{sd\_BSA\_MK2\_total} \quad (53)$$

$$\sigma\{Y\_BSA\_p38\_total\} = \text{sd\_BSA\_p38\_total}. \quad (54)$$

The agreement of the model observables and the experimental data, given in Table 4, yields a value of the objective function  $-2\log(L) = -68.1049$  for 14 data points in this data set. The model observables and the experimental data is show in Figure 3.

**Measurement of the calibrator** On the same gel we measured the intensity of a fixed volume of calibrator. The observation functions are defined as

| BSA<br>[ $\mu\text{g}$ ] | Y_BSA_MK2_total<br>conc. [a.u.] | Y_BSA_p38_total<br>conc. [a.u.] |
|--------------------------|---------------------------------|---------------------------------|
| 0.1                      | 4.75156e+07                     | 5.4429e+07                      |
| 0.25                     | 8.92377e+07                     | 8.25749e+07                     |
| 0.5                      | 1.43711e+08                     | 1.30497e+08                     |
| 0.75                     | 1.83763e+08                     | 1.72177e+08                     |
| 1                        | 2.4309e+08                      | 2.15994e+08                     |
| 1.5                      | 3.1237e+08                      | 2.88308e+08                     |
| 2                        | 3.75989e+08                     | 3.7801e+08                      |

**Table 4: Experimental data for the experiment described in Section 2.1.2.**

| calibrator<br>[ $\mu\text{L}$ ] | I_MK2_total<br>conc. [a.u.] | I_p38_total<br>conc. [a.u.] |
|---------------------------------|-----------------------------|-----------------------------|
| 15                              |                             | 3.15027e+08                 |
| 30                              | 1.58503e+08                 |                             |

**Table 5: Experimental data for the experiment described in Section 2.1.3.**

$$I_{\text{MK2\_total}} = \frac{\text{offset\_BSA\_MK2\_total} + \text{conc\_MK2\_total\_calibrator} \cdot m_{\text{molekule\_MK2}} \cdot \text{scale\_BSA\_MK2\_total} \cdot \text{calibrator}}{1000} \quad (55)$$

$$I_{\text{p38\_total}} = \frac{\text{offset\_BSA\_p38\_total} + \text{conc\_p38\_total\_calibrator} \cdot m_{\text{molekule\_p38}} \cdot \text{scale\_BSA\_p38\_total} \cdot \text{calibrator}}{1000} \quad (56)$$

with error models

$$\sigma\{I_{\text{MK2\_total}}\} = \text{sd\_BSA\_MK2\_total} \quad (57)$$

$$\sigma\{I_{\text{p38\_total}}\} = \text{sd\_BSA\_p38\_total} \quad (58)$$

For the molecular masses of p38 and MK2 we used

$$m_{\text{molekule\_p38}} = 67 \text{ kDalton} \quad (59)$$

$$m_{\text{molekule\_MK2}} = 70 \text{ kDalton.} \quad (60)$$

The parameter  $\text{conc\_p38\_total\_calibrator}$  gives the amount of p38\_total in  $\mu\text{Mol}$  in one litre of p38\_total calibrator, MK2\_total respectively.

The agreement of the model observables and the experimental data, given in Table 5, yields a value of the objective function  $-2 \log(L) = -12.015$  for 2 data points in this data set. The model observables and the experimental data is show in Figure 4.

### 2.1.3 Experiment: Cell\_volume

To obtain the protein concentrations in the used primary hepatocytes we need the total volume of the used cells. For this the volume of a single cells was measured ( $\text{cellvolume} = (15.475 \pm 4.044) \text{ pL}$ ). With a measured number of cells of 59524 one can calculate the total volume of the used cells. Since the error of the measured volume is relative high ( $\approx 26 \%$ ), we estimated the volume simultaneously with the other experiments. As data point we used the measured volume of a single cell with the fixed error on the logarithmic scale:

$$\sigma\{\text{cellvolume}\} = 0.2613 \quad (61)$$



**Figure 4: Observables and data for the experiment described in Section 2.1.3.** The observables are displayed as solid lines. The error model that describes the measurement noise is indicated by shades.

| n_cells | cell_volume |
|---------|-------------|
| [1]     | [μL]        |
| 1       | 1.548e-05   |

**Table 6: Experimental data for the experiment Cell\_volume**

As observation function we used

$$\text{cellvolume}(n\_cells) = \frac{V \cdot n\_cells}{59524}, \tag{62}$$

this gives the total volume  $V$ .

The agreement of the model observables and the experimental data, given in Table 6, yields a value of the objective function  $-2 \log(L) = -0.846295$  for 1 data points in this data set. The model observables and the experimental data is show in Figure 5.



**Figure 5: Cell\_volume observables and experimental data for the experiment.** The observables are displayed as solid lines. The error model that describes the measurement noise is indicated by shades.

#### 2.1.4 Summary of the calibration

With the calibration we can set the scaling parameters

$$\text{scale\_p38\_total} = \frac{\text{conc\_p38\_total\_calibrator}}{\text{intstd\_in\_p38\_total\_calibrator}} \quad (63)$$

$$\text{scale\_MK2\_total} = \frac{\text{conc\_MK2\_total\_calibrator}}{\text{intstd\_in\_MK2\_total\_calibrator}} \quad (64)$$

$$\text{scale\_pp38} = \frac{\text{frac\_massspec\_pp38} \cdot \text{conc\_p38\_total\_calibrator}}{\text{intstd\_in\_pp38\_calibrator}} \quad (65)$$

$$\text{scale\_pMK2} = \frac{\text{frac\_massspec\_pp38} \cdot \text{conc\_MK2\_total\_calibrator}}{\text{intstd\_in\_pMK2\_calibrator}} \quad (66)$$

These are defining the amount of the corresponding protein in  $\mu\text{Mol}$  in one litre internal standard. As mentioned above the ratio of pp38 and pMK2 in the calibrator was measured by mass spectroscopy:

$$\text{frac\_massspec\_pp38} = 7.2 \% \quad (67)$$

$$\text{frac\_massspec\_pMK2} = 59 \% \quad (68)$$

With this, typical observation functions for an experiment with measured internal standard, e. g. for pp38, are looking like

$$p\_p38\_au(t) = \text{offset\_gel\_pp38\_ExpID} + [pp38](t) \cdot \text{scale\_pp38\_ExpID} \quad (69)$$

$$\text{int\_p\_p38\_au}(\text{intstd}) = \text{offset\_gel\_pp38\_ExpID} + \frac{\text{scale\_pp38} \cdot \text{scale\_pp38\_ExpID} \cdot \text{intstd}}{V} \quad (70)$$

$p\_p38\_au$  is the simulated value of the measured protein. The intensity background of the gel is modeled by the gel specific offset parameter  $\text{offset\_gel\_pp38\_ExpID}$ .  $[pp38](t)$  is the by the ODE simulated concentration of pp38 in  $\mu\text{M}$  which is scaled by the scaling parameter  $\text{scale\_pp38\_ExpID}$  with the unit

Intensity/ $\mu\text{M}$ . This scaling parameter is determined by the internal standard *int\_p\_pp38\_au*, for which a calibration curve for different volumes *intstd* of internal standard is measured. The parameter *scale\_pp38* is determined in the previous calibration experiments (Section 2.1.1 and 2.1.2) and defines the amount of pp38 in the internal standard. This means the product *scale\_pp38*·*intstd* is the total amount of measured pp38 in the internal standard. To obtain the corresponding amount of pp38 in the measured cells one has to divide this by the total cell volume *V*:

$$\frac{\text{scale\_pp38} \cdot \text{intstd}}{V} \tag{71}$$

With this the parameter *scale\_pp38\_ExpID* has the correct unit and determines the correct scale of pp38 in  $\mu\text{M}$ .



**Figure 6: 090102\_page090116\_wt\_il1\_20\_pmk2 observables and experimental data for the experiment.** The observables are displayed as solid lines. The error model that describes the measurement noise is indicated by shades.

| time<br>[min] | input_il1b<br>[ng · ml <sup>-1</sup> ] | p_mk2_au<br>conc. [a.u.] |
|---------------|----------------------------------------|--------------------------|
| 0             | 20                                     | 40431                    |
| 10            | 20                                     | 519999                   |
| 20            | 20                                     | 389767                   |
| 40            | 20                                     | 308655                   |
| 120           | 20                                     | 86614                    |

**Table 7: Experimental data for the experiment 090102\_page090116\_wt\_il1\_20\_pmk2**

## 2.2 Time course experiments for different IL-1 $\beta$ doses and inhibitors

### 2.2.1 Experiment: 090102\_page090116\_wt\_il1\_20\_pmk2

**Comments** In this experiment the primary hepatocytes were treated with 20 ng/ml IL-1 $\beta$ .

**Model fit and plots** The agreement of the model observables and the experimental data, given in Table 7, yields a value of the objective function  $-2 \log(L) = 0.585488$  for 5 data points in this data set. The model observables and the experimental data is show in Figure 6.

**Observables** The following observables are added in this data set:

- **Observable:** p\_mk2\_au

$$p\_mk2\_au(t) = \text{offset\_gel\_pMK2\_090102} + [pMK2] \cdot \text{scale\_pMK2\_090102} \quad (72)$$

Unit: conc. [a.u.]; With error model:

$$\sigma\{p\_mk2\_au\}(t) = \text{sd\_pMK2\_au} \quad (73)$$

**Conditions** To evaluate the ODE system of Equation 23 – 27 for the conditions in this experiment, the following parameter transformations are applied:

$$\text{input\_il1b} \rightarrow 20$$

$$\text{scale\_pMK2\_090102} \rightarrow \frac{\text{scale\_pMK2\_090102}}{\text{init\_MK2}}$$



Figure 7: 090615d\_page090922a\_wt\_il1\_0u5u10u20u40\_pm2\_pp38 observables and experimental data for the experiment. The observables are displayed as solid lines. The error model that describes the measurement noise is indicated by shades.

### 2.2.2 Experiment: 090615d\_page090922a\_wt\_il1\_0u5u10u20u40\_pm2\_pp38

**Comments** In this experiment the primary hepatocytes were treated with IL-1 $\beta$  doses from 5–40 ng/ml.

**Model fit and plots** The agreement of the model observables and the experimental data, given in Table 8, yields a value of the objective function  $-2 \log(L) = -29.7675$  for 26 data points in this data set. The model observables and the experimental data is show in Figure 7.

**Observables** The following observables are added in this data set:

- **Observable:** p\_mk2\_au

$$p\_mk2\_au(t) = \text{offset\_gel\_pMK2\_090615d\_090922a} + [pMK2] \cdot \text{scale\_pMK2\_090615d\_090922a} \quad (74)$$

Unit: conc. [a.u.]; With error model:

$$\sigma\{p\_mk2\_au\}(t) = \text{sd\_pMK2\_au} \quad (75)$$

- **Observable:** p\_p38\_au

$$p\_p38\_au(t) = \text{offset\_gel\_pp38\_090615d\_090922a} + [pp38] \cdot \text{scale\_pp38\_090615d\_090922a} \quad (76)$$

| time<br>[min] | input_il1b<br>[ng · ml <sup>-1</sup> ] | p_p38_au<br>conc. [a.u.] | p_mk2_au<br>conc. [a.u.] |
|---------------|----------------------------------------|--------------------------|--------------------------|
| 5             | 5                                      | 463621                   | 86479                    |
| 5             | 10                                     | 478366                   | 136670                   |
| 5             | 20                                     | 767973                   | 220230                   |
| 5             | 40                                     | 998747                   | 275795                   |
| 10            | 5                                      | 841383                   | 294867                   |
| 10            | 10                                     | 1.22359e+06              | 345405                   |
| 10            | 20                                     | 1.15988e+06              | 341760                   |
| 10            | 40                                     | 949109                   | 265298                   |
| 30            | 5                                      | 725408                   | 348571                   |
| 30            | 10                                     | 603405                   | 217098                   |
| 30            | 20                                     | 609009                   | 248117                   |
| 30            | 40                                     | 395657                   | 188015                   |
| 0             | 5                                      | 15634                    | 42469                    |

**Table 8:** Experimental data for the experiment 090615d\_page090922a\_wt\_il1\_0u5u10u20u40\_pmk2\_pp38

Unit: conc. [a.u.]; With error model:

$$\sigma\{p\_p38\_au\}(t) = sd\_pp38\_au \tag{77}$$

**Conditions** To evaluate the ODE system of Equation 23 – 27 for the conditions in this experiment, the following parameter transformations are applied:

$$\begin{aligned} \text{input\_il1b} &\rightarrow 10 \mid 20 \mid 40 \mid 5 \\ \text{scale\_pMK2\_090615d\_090922a} &\rightarrow \frac{\text{scale\_pMK2\_090615d\_090922a}}{\text{init\_MK2}} \\ \text{scale\_pp38\_090615d\_090922a} &\rightarrow \frac{\text{scale\_pp38\_090615d\_090922a}}{\text{init\_p38}} \end{aligned}$$



Figure 8: 090615d\_page090922b\_wt\_il1\_0u5u10u20u40\_pmk2\_pp38 observables and experimental data for the experiment. The observables are displayed as solid lines. The error model that describes the measurement noise is indicated by shades.

### 2.2.3 Experiment: 090615d\_page090922b\_wt\_il1\_0u5u10u20u40\_pmk2\_pp38

**Comments** In this experiment the primary hepatocytes were treated with IL-1 $\beta$  doses from 5–40 ng/ml.

**Model fit and plots** The agreement of the model observables and the experimental data, given in Table 9, yields a value of the objective function  $-2 \log(L) = 10.7939$  for 26 data points in this data set. The model observables and the experimental data is show in Figure 8.

**Observables** The following observables are added in this data set:

- **Observable:** p\_mk2\_au

$$p\_mk2\_au(t) = \text{offset\_gel\_pMK2\_090615d\_090922b} + [pMK2] \cdot \text{scale\_pMK2\_090615d\_090922b} \quad (78)$$

Unit: conc. [a.u.]; With error model:

$$\sigma\{p\_mk2\_au\}(t) = \text{sd\_pMK2\_au} \quad (79)$$

- **Observable:** p\_p38\_au

$$p\_p38\_au(t) = \text{offset\_gel\_pp38\_090615d\_090922b} + [pp38] \cdot \text{scale\_pp38\_090615d\_090922b} \quad (80)$$

| time<br>[min] | input_il1b<br>[ng · ml <sup>-1</sup> ] | p_p38_au<br>conc. [a.u.] | p_mk2_au<br>conc. [a.u.] |
|---------------|----------------------------------------|--------------------------|--------------------------|
| 5             | 5                                      | 316559                   | 54389                    |
| 5             | 10                                     | 276372                   | 237636                   |
| 5             | 20                                     | 640375                   | 260276                   |
| 5             | 40                                     | 686666                   | 400926                   |
| 10            | 5                                      | 633892                   | 387492                   |
| 10            | 10                                     | 923556                   | 291766                   |
| 10            | 20                                     | 826173                   | 464694                   |
| 10            | 40                                     | 832909                   | 418138                   |
| 30            | 5                                      | 360133                   | 335219                   |
| 30            | 10                                     | 472570                   | 271549                   |
| 30            | 20                                     | 178493                   | 314745                   |
| 30            | 40                                     | 253719                   | 314434                   |
| 0             | 5                                      | 6238                     | 48922                    |

**Table 9: Experimental data for the experiment 090615d\_page090922b\_wt\_il1\_0u5u10u20u40\_pmk2\_pp38**

Unit: conc. [a.u.]; With error model:

$$\sigma\{p\_p38\_au\}(t) = sd\_pp38\_au \quad (81)$$

**Conditions** To evaluate the ODE system of Equation 23 – 27 for the conditions in this experiment, the following parameter transformations are applied:

$$\begin{aligned} \text{input\_il1b} &\rightarrow 10 \mid 20 \mid 40 \mid 5 \\ \text{scale\_pMK2\_090615d\_090922b} &\rightarrow \frac{\text{scale\_pMK2\_090615d\_090922b}}{\text{init\_MK2}} \\ \text{scale\_pp38\_090615d\_090922b} &\rightarrow \frac{\text{scale\_pp38\_090615d\_090922b}}{\text{init\_p38}} \end{aligned}$$



**Figure 9:** 090615d\_page090922d\_wt\_il1\_0u5u10u20u40\_pmK2\_pp38 observables and experimental data for the experiment. The observables are displayed as solid lines. The error model that describes the measurement noise is indicated by shades.

#### 2.2.4 Experiment: 090615d\_page090922d\_wt\_il1\_0u5u10u20u40\_pmK2\_pp38

**Comments** In this experiment the primary hepatocytes were treated with IL-1 $\beta$  doses from 5–40 ng/ml.

**Model fit and plots** The agreement of the model observables and the experimental data, given in Table 10, yields a value of the objective function  $-2 \log(L) = 5.52599$  for 26 data points in this data set. The model observables and the experimental data is show in Figure 9.

**Observables** The following observables are added in this data set:

- **Observable:** p\_mk2\_au

$$p\_mk2\_au(t) = \text{offset\_gel\_pMK2\_090615d\_090922d} + [pMK2] \cdot \text{scale\_pMK2\_090615d\_090922d} \quad (82)$$

Unit: conc. [a.u.]; With error model:

$$\sigma\{p\_mk2\_au\}(t) = \text{sd\_pMK2\_au} \quad (83)$$

- **Observable:** p\_p38\_au

$$p\_p38\_au(t) = \text{offset\_gel\_pp38\_090615d\_090922d} + [pp38] \cdot \text{scale\_pp38\_090615d\_090922d} \quad (84)$$

| time<br>[min] | input_il1b<br>[ng · ml <sup>-1</sup> ] | p_p38_au<br>conc. [a.u.] | p_mk2_au<br>conc. [a.u.] |
|---------------|----------------------------------------|--------------------------|--------------------------|
| 20            | 5                                      | 797129                   | 275248                   |
| 20            | 10                                     | 1.12635e+06              | 363543                   |
| 20            | 20                                     | 749117                   | 329073                   |
| 20            | 40                                     | 694659                   | 277874                   |
| 40            | 5                                      | 521691                   | 191276                   |
| 40            | 10                                     | 322413                   | 121595                   |
| 40            | 20                                     | 419944                   | 195814                   |
| 40            | 40                                     | 259587                   | 178017                   |
| 60            | 5                                      | 83158                    | 89755                    |
| 60            | 10                                     | 128606                   | 106983                   |
| 60            | 20                                     | 204702                   | 146477                   |
| 60            | 40                                     | 84661                    | 82470                    |
| 0             | 5                                      | 21421                    | 50438                    |

Table 10: Experimental data for the experiment 090615d\_page090922d\_wt\_il1\_0u5u10u20u40\_pmk2\_pp38

Unit: conc. [a.u.]; With error model:

$$\sigma\{p\_p38\_au\}(t) = sd\_pp38\_au \tag{85}$$

**Conditions** To evaluate the ODE system of Equation 23 – 27 for the conditions in this experiment, the following parameter transformations are applied:

$$\begin{aligned} \text{input\_il1b} &\rightarrow 10 \mid 20 \mid 40 \mid 5 \\ \text{scale\_pMK2\_090615d\_090922d} &\rightarrow \frac{\text{scale\_pMK2\_090615d\_090922d}}{\text{init\_MK2}} \\ \text{scale\_pp38\_090615d\_090922d} &\rightarrow \frac{\text{scale\_pp38\_090615d\_090922d}}{\text{init\_p38}} \end{aligned}$$

| time<br>[min] | input_il1b<br>[ng · ml <sup>-1</sup> ] | p_p38_au<br>conc. [a.u.] | p_mk2_au<br>conc. [a.u.] |
|---------------|----------------------------------------|--------------------------|--------------------------|
| 5             | 5                                      | 3.85704e+06              | 832129                   |
| 5             | 10                                     | 5.45230e+06              | 1.06561e+06              |
| 5             | 20                                     | 6.11666e+06              | 1.10801e+06              |
| 5             | 40                                     | 7.34388e+06              | 1.39979e+06              |
| 10            | 5                                      | 7.20263e+06              | 1.30066e+06              |
| 10            | 10                                     | 9.92429e+06              | 1.51536e+06              |
| 10            | 20                                     | 1.07679e+07              | 1.72398e+06              |
| 10            | 40                                     | 1.00502e+07              | 1.84325e+06              |
| 15            | 5                                      | 7.51519e+06              | 1.50596e+06              |
| 15            | 10                                     | 7.96418e+06              | 1.67580e+06              |
| 15            | 20                                     | 8.55007e+06              | 1.75636e+06              |
| 15            | 40                                     | 8.41126e+06              | 1.62515e+06              |
| 20            | 5                                      | 9.04304e+06              | 1.31570e+06              |
| 20            | 10                                     | 9.95753e+06              | 1.85173e+06              |
| 20            | 20                                     | 5.73780e+06              | 1.35735e+06              |
| 20            | 40                                     | 6.56592e+06              | 1.42385e+06              |
| 30            | 5                                      | 7.49298e+06              | 1.34872e+06              |
| 30            | 10                                     | 3.68589e+06              | 1.07438e+06              |
| 30            | 20                                     | 5.10401e+06              | 1.20820e+06              |
| 30            | 40                                     | 3.81070e+06              | 1.13802e+06              |
| 40            | 5                                      | 6.04455e+06              | 1.09083e+06              |
| 40            | 10                                     | 4.28244e+06              | 1.06774e+06              |
| 40            | 20                                     | 3.88159e+06              | 881711                   |
| 40            | 40                                     | 3.05142e+06              | 792293                   |
| 60            | 5                                      | 2.53057e+06              | 666561                   |
| 60            | 10                                     | 2.06356e+06              | 610114                   |
| 60            | 20                                     | 2.47781e+06              | 349859                   |
| 60            | 40                                     | 1.68575e+06              | 400739                   |
| 0             | 5                                      | 701946                   | 131368                   |
| 0             | 5                                      | 741466                   | 120531                   |

Table 11: Experimental data for the experiment 090615d\_page100416\_wt\_il1\_0u5u10u20u40\_pmk2\_pp38

### 2.2.5 Experiment: 090615d\_page100416\_wt\_il1\_0u5u10u20u40\_pmk2\_pp38

**Comments** In this experiment the primary hepatocytes were treated with IL-1 $\beta$  doses from 5–40 ng/ml and the internal standard was measured.

**Model fit and plots** The agreement of the model observables and the experimental data, given in Table 11 and 12 yields a value of the objective function  $-2 \log(L) = -15.7179$  for 70 data points in this data set. The model observables and the experimental data is show in Figure 10.

**Observables** The following observables are added in this data set:

- **Observable:** p\_mk2\_au

$$p\_mk2\_au(t) = \text{offset\_gel\_pMK2\_090615d\_100416} + [pMK2] \cdot \text{scale\_pMK2\_090615d\_100416} \quad (86)$$

| intstd<br>[ $\mu$ L] | int_p_p38_au<br>conc. [a.u.] | int_p_mk2_au<br>conc. [a.u.] |
|----------------------|------------------------------|------------------------------|
| 1                    | 16635                        | 113502                       |
| 5                    | 215793                       | 1.52989e+06                  |
| 10                   | 845957                       | 4.52694e+06                  |
| 20                   | 2.0123e+06                   | 1.07057e+07                  |
| 40                   | 4.2294e+06                   | 1.09304e+07                  |

Table 12: Internal standard for the experiment 090615d\_page100416\_wt\_il1\_0u5u10u20u40\_pmk2\_pp38



Figure 10: 090615d\_page100416\_wt\_il1\_0u5u10u20u40\_pmk2\_pp38 observables and experimental data for the experiment. The observables are displayed as solid lines. The error model that describes the measurement noise is indicated by shades.

Unit: conc. [a.u.]; With error model:

$$\sigma\{p\_mk2\_au\}(t) = sd\_pMK2\_au \quad (87)$$

• **Observable:** p\_p38\_au

$$p\_p38\_au(t) = offset\_gel\_pp38\_090615d\_100416 + [pp38] \cdot scale\_pp38\_090615d\_100416 \quad (88)$$

Unit: conc. [a.u.]; With error model:

$$\sigma\{p\_p38\_au\}(t) = sd\_pp38\_au \quad (89)$$

• **Observable:** int\_p\_mk2\_au

$$int\_p\_mk2\_au(intstd) = offset\_gel\_pMK2\_090615d\_100416 + \frac{scale\_pMK2 \cdot scale\_pMK2\_090615d\_100416 \cdot intstd}{V} \quad (90)$$

Unit: conc. [a.u.]; With error model:

$$\sigma\{int\_p\_mk2\_au\}(intstd) = sd\_pMK2\_au \quad (91)$$

• **Observable:** int\_p\_p38\_au

$$int\_p\_p38\_au(intstd) = offset\_gel\_pp38\_090615d\_100416 + \frac{scale\_pp38 \cdot scale\_pp38\_090615d\_100416 \cdot intstd}{V} \quad (92)$$

Unit: conc. [a.u.]; With error model:

$$\sigma\{int\_p\_p38\_au\}(intstd) = sd\_pp38\_au \quad (93)$$

**Conditions** To evaluate the ODE system of Equation 23 – 27 for the conditions in this experiment, the following parameter transformations are applied:

$$input\_il1b \rightarrow 10 \mid 20 \mid 40 \mid 5$$

$$scale\_090615d\_100416 \rightarrow \frac{scale\_090615d\_100416}{init\_MK2}$$

$$scale\_pp38\_090615d\_100416 \rightarrow \frac{scale\_pp38\_090615d\_100416}{init\_p38}$$

| time<br>[min] | input_il1b<br>[ng · ml <sup>-1</sup> ] | p_p38_au<br>conc. [a.u.] | p_mk2_au<br>conc. [a.u.] |
|---------------|----------------------------------------|--------------------------|--------------------------|
| 5             | 5                                      | 441436                   | 222497                   |
| 5             | 10                                     | 824574                   | 269158                   |
| 5             | 20                                     | 637912                   | 177187                   |
| 5             | 40                                     | 620782                   | 348341                   |
| 10            | 5                                      | 1.55456e+06              | 414908                   |
| 10            | 10                                     | 1.66948e+06              | 506620                   |
| 10            | 20                                     | 1.74006e+06              | 462302                   |
| 10            | 40                                     | 1.60241e+06              | 458197                   |
| 15            | 5                                      | 1.01049e+06              | 427271                   |
| 15            | 10                                     | 1.83170e+06              | 531053                   |
| 15            | 20                                     | 1.56507e+06              | 409766                   |
| 15            | 40                                     | 1.50000e+06              | 404697                   |
| 20            | 5                                      | 1.26182e+06              | 399013                   |
| 20            | 10                                     | 1.45601e+06              | 332797                   |
| 20            | 20                                     | 614984                   | 352496                   |
| 20            | 40                                     | 1.31569e+06              | 393247                   |
| 30            | 5                                      | 840187                   | 324738                   |
| 30            | 10                                     | 471757                   | 257150                   |
| 30            | 20                                     | 424028                   | 195467                   |
| 30            | 40                                     | 502516                   | 226108                   |
| 40            | 5                                      | 708126                   | 357230                   |
| 40            | 10                                     | 736960                   | 267618                   |
| 40            | 20                                     | 545801                   | 235957                   |
| 40            | 40                                     | 172379                   | 176232                   |
| 60            | 5                                      | 349761                   | 135355                   |
| 60            | 10                                     | 290272                   | 159155                   |
| 60            | 20                                     | 387787                   | 168381                   |
| 60            | 40                                     | 175167                   | 88950                    |
| 0             | 5                                      | 44235                    | 12126                    |
| 0             | 5                                      | 50732                    | 26077                    |

Table 13: Experimental data for the experiment 090615d\_page100419\_wt\_il1\_0u5u10u20u40\_pmk2\_pp38

### 2.2.6 Experiment: 090615d\_page100419\_wt\_il1\_0u5u10u20u40\_pmk2\_pp38

**Comments** In this experiment the primary hepatocytes were treated with IL-1 $\beta$  doses from 5–40 ng/ml and the internal standard was measured.

**Model fit and plots** The agreement of the model observables and the experimental data, given in Table 13 and 14, yields a value of the objective function  $-2\log(L) = 37.2513$  for 70 data points in this data set. The model observables and the experimental data is show in Figure 11.

**Observables** The following observables are added in this data set:

- **Observable:** p\_mk2\_au

$$p\_mk2\_au(t) = \text{offset\_gel\_pMK2\_090615d\_110419} + [pMK2] \cdot \text{scale\_pMK2\_090615d\_110419} \quad (94)$$

| intstd<br>[ $\mu$ L] | int_p_p38_au<br>conc. [a.u.] | int_p_mk2_au<br>conc. [a.u.] |
|----------------------|------------------------------|------------------------------|
| 1                    | 12501                        | 2456                         |
| 5                    | 227332                       | 75620                        |
| 10                   | 687776                       | 177162                       |
| 20                   | 920562                       | 444395                       |
| 40                   | 2.80949e+06                  | 1.27738e+06                  |

Table 14: Internal standard for the experiment 090615d\_page100419\_wt\_il1\_0u5u10u20u40\_pmk2\_pp38



Figure 11: 090615d\_page100419\_wt\_il1\_0u5u10u20u40\_pmk2\_pp38 observables and experimental data for the experiment. The observables are displayed as solid lines. The error model that describes the measurement noise is indicated by shades.

Unit: conc. [a.u.]; With error model:

$$\sigma\{p\_mk2\_au\}(t) = sd\_pMK2\_au \quad (95)$$

• **Observable:** p\_p38\_au

$$p\_p38\_au(t) = offset\_gel\_pp38\_090615d\_110419 + [pp38] \cdot scale\_pp38\_090615d\_110419 \quad (96)$$

Unit: conc. [a.u.]; With error model:

$$\sigma\{p\_p38\_au\}(t) = sd\_pp38\_au \quad (97)$$

• **Observable:** int\_p\_mk2\_au

$$int\_p\_mk2\_au(intstd) = offset\_gel\_pMK2\_090615d\_110419 + \frac{scale\_pMK2 \cdot scale\_pMK2\_090615d\_110419 \cdot intstd}{V} \quad (98)$$

Unit: conc. [a.u.]; With error model:

$$\sigma\{int\_p\_mk2\_au\}(intstd) = sd\_pMK2\_au \quad (99)$$

• **Observable:** int\_p\_p38\_au

$$int\_p\_p38\_au(intstd) = offset\_gel\_pp38\_090615d\_110419 + \frac{scale\_pp38 \cdot scale\_pp38\_090615d\_110419 \cdot intstd}{V} \quad (100)$$

Unit: conc. [a.u.]; With error model:

$$\sigma\{int\_p\_p38\_au\}(intstd) = sd\_pp38\_au \quad (101)$$

**Conditions** To evaluate the ODE system of Equation 23 – 27 for the conditions in this experiment, the following parameter transformations are applied:

$$input\_il1b \rightarrow 10 \mid 20 \mid 40 \mid 5$$

$$scale\_pMK2\_090615d\_110419 \rightarrow \frac{scale\_pMK2\_090615d\_110419}{init\_MK2}$$

$$scale\_pp38\_090615d\_110419 \rightarrow \frac{scale\_pp38\_090615d\_110419}{init\_p38}$$

| time<br>[min] | input_il1b<br>[ng · ml <sup>-1</sup> ] | p_p38_au<br>conc. [a.u.] | p_mk2_au<br>conc. [a.u.] |
|---------------|----------------------------------------|--------------------------|--------------------------|
| 5             | 1                                      | 1.50187e+06              | 1.11242e+06              |
| 5             | 2                                      | 1.71921e+06              | 1.30618e+06              |
| 5             | 5                                      | 1.89156e+06              | 1.06816e+06              |
| 5             | 10                                     | 1.48687e+06              | 1.03857e+06              |
| 10            | 1                                      | 2.18956e+06              | 982099                   |
| 10            | 2                                      | 2.88284e+06              | 1.52456e+06              |
| 10            | 5                                      | 3.32338e+06              | 1.56689e+06              |
| 10            | 10                                     | 1.70111e+06              | 1.19469e+06              |
| 15            | 1                                      | 2.57455e+06              | 1.17143e+06              |
| 15            | 2                                      | 3.01582e+06              | 1.63693e+06              |
| 15            | 5                                      | 2.35668e+06              | 1.02704e+06              |
| 15            | 10                                     | 2.74691e+06              | 1.47736e+06              |
| 20            | 1                                      | 3.34091e+06              | 1.55023e+06              |
| 20            | 2                                      | 3.02110e+06              | 1.21861e+06              |
| 20            | 5                                      | 3.11033e+06              | 1.49846e+06              |
| 20            | 10                                     | 2.96366e+06              | 1.28430e+06              |
| 30            | 1                                      | 2.88188e+06              | 1.65872e+06              |
| 30            | 2                                      | 2.10930e+06              | 1.56836e+06              |
| 30            | 5                                      | 2.51228e+06              | 1.42122e+06              |
| 30            | 10                                     | 1.74290e+06              | 1.02397e+06              |
| 40            | 1                                      | 2.35449e+06              | 1.51809e+06              |
| 40            | 2                                      | 1.27989e+06              | 1.01723e+06              |
| 40            | 5                                      | 1.35202e+06              | 1.07519e+06              |
| 40            | 10                                     | 1.75703e+06              | 1.29907e+06              |
| 60            | 1                                      | 903187                   | 1.01064e+06              |
| 60            | 2                                      | 847397                   | 842638                   |
| 60            | 5                                      | 1.49937e+06              | 1.16036e+06              |
| 60            | 10                                     | 1.14342e+06              | 1.04137e+06              |
| 0             | 1                                      | 612490                   | 684038                   |
| 0             | 1                                      | 717948                   | 751458                   |
| 0             | 1                                      | 629607                   | 676409                   |
| 0             | 1                                      | 698580                   | 755642                   |

Table 15: Experimental data for the experiment 100421\_page100428\_wt\_il1\_0u1u2u5u10\_pmk2\_pp38

### 2.2.7 Experiment: 100421\_page100428\_wt\_il1\_0u1u2u5u10\_pmk2\_pp38

**Comments** In this experiment the primary hepatocytes were treated with IL-1 $\beta$  doses from 1–10 ng/ml and the internal standard was measured.

**Model fit and plots** The agreement of the model observables and the experimental data, given in Table 15 and 15, yields a value of the objective function  $-2 \log(L) = -121.552$  for 74 data points in this data set. The model observables and the experimental data is show in Figure 12.

**Observables** The following observables are added in this data set:

- **Observable:** p\_mk2\_au

$$p\_mk2\_au(t) = \text{offset\_gel\_pMK2\_100241\_100428} + [pMK2] \cdot \text{scale\_pMK2\_100241\_100428} \quad (102)$$

Unit: conc. [a.u.]; With error model:

$$\sigma\{p\_mk2\_au\}(t) = \text{sd\_pMK2\_au} \quad (103)$$

- **Observable:** p\_p38\_au

$$p\_p38\_au(t) = \text{offset\_gel\_pp38\_100241\_100428} + [pp38] \cdot \text{scale\_pp38\_100241\_100428} \quad (104)$$

Unit: conc. [a.u.]; With error model:

$$\sigma\{p\_p38\_au\}(t) = \text{sd\_pp38\_au} \quad (105)$$



Figure 12: 100421\_page100428.wt\_il1\_0u1u2u5u10\_pmk2\_pp38 observables and experimental data for the experiment. The observables are displayed as solid lines. The error model that describes the measurement noise is indicated by shades.

| intstd<br>[ $\mu\text{L}$ ] | int_p_p38_au<br>conc. [a.u.] | int_p_mk2_au<br>conc. [a.u.] |
|-----------------------------|------------------------------|------------------------------|
| 1                           | 427058                       | 662529                       |
| 5                           | 1.05384e+06                  | 788116                       |
| 10                          | 1.50544e+06                  | 913120                       |
| 20                          | 2.74532e+06                  | 1.24266e+06                  |
| 40                          | 5.11046e+06                  | 2.66121e+06                  |

Table 16: Internal standard for the experiment 100421\_page100428.wt\_il1\_0u1u2u5u10\_pmk2\_pp38

- **Observable:** `int_p_mk2_au`

$$\text{int\_p\_mk2\_au}(\text{intstd}) = \text{offset\_gel\_pMK2\_100241\_100428} + \frac{\text{scale\_pMK2} \cdot \text{scale\_pMK2\_100241\_100428} \cdot \text{intstd}}{V} \quad (106)$$

Unit: conc. [a.u.]; With error model:

$$\sigma\{\text{int\_p\_mk2\_au}\}(\text{intstd}) = \text{sd\_pMK2\_au} \quad (107)$$

- **Observable:** `int_p_p38_au`

$$\text{int\_p\_p38\_au}(\text{intstd}) = \text{offset\_gel\_pp38\_100241\_100428} + \frac{\text{scale\_pp38} \cdot \text{scale\_pp38\_100241\_100428} \cdot \text{intstd}}{V} \quad (108)$$

Unit: conc. [a.u.]; With error model:

$$\sigma\{\text{int\_p\_p38\_au}\}(\text{intstd}) = \text{sd\_pp38\_au} \quad (109)$$

**Conditions** To evaluate the ODE system of Equation 23 – 27 for the conditions in this experiment, the following parameter transformations are applied:

$$\text{input\_il1b} \rightarrow 1 \mid 10 \mid 2 \mid 5$$

$$\text{scale\_pMK2\_100241\_100428} \rightarrow \frac{\text{scale\_pMK2\_100241\_100428}}{\text{init\_MK2}}$$

$$\text{scale\_pp38\_100241\_100428} \rightarrow \frac{\text{scale\_pp38\_100241\_100428}}{\text{init\_p38}}$$

| time<br>[min] | input_il1b<br>[ng · ml <sup>-1</sup> ] | p-p38_au<br>conc. [a.u.] | p_mk2_au<br>conc. [a.u.] |
|---------------|----------------------------------------|--------------------------|--------------------------|
| 5             | 1                                      | 925339                   | 79748                    |
| 5             | 2                                      | 934619                   | 89586                    |
| 5             | 5                                      | 1.07770e+06              | 122261                   |
| 5             | 10                                     | 1.38406e+06              | 137162                   |
| 10            | 1                                      | 1.28419e+06              | 151815                   |
| 10            | 2                                      | 1.48179e+06              | 158137                   |
| 10            | 5                                      | 1.39311e+06              | 190807                   |
| 10            | 10                                     | 1.47578e+06              | 173884                   |
| 15            | 1                                      | 1.80453e+06              | 194760                   |
| 15            | 2                                      | 1.51348e+06              | 210006                   |
| 15            | 5                                      | 1.47673e+06              | 204830                   |
| 15            | 10                                     | 1.60325e+06              | 236763                   |
| 20            | 1                                      | 1.21865e+06              | 130650                   |
| 20            | 2                                      | 1.63203e+06              | 243140                   |
| 20            | 5                                      | 1.90430e+06              | 226179                   |
| 20            | 10                                     | 1.77121e+06              | 217254                   |
| 30            | 1                                      | 1.39577e+06              | 164699                   |
| 30            | 2                                      | 1.27977e+06              | 133866                   |
| 30            | 5                                      | 1.08711e+06              | 189901                   |
| 30            | 10                                     | 1.18237e+06              | 122531                   |
| 40            | 1                                      | 965871                   | 106761                   |
| 40            | 2                                      | 1.01813e+06              | 168894                   |
| 40            | 5                                      | 1.10041e+06              | 105705                   |
| 40            | 10                                     | 882114                   | 134872                   |
| 60            | 1                                      | 892197                   | 96343                    |
| 60            | 2                                      | 768930                   | 116729                   |
| 60            | 5                                      | 742301                   | 61663                    |
| 60            | 10                                     | 861305                   | 73937                    |
| 0             | 1                                      | 612099                   | 14804                    |
| 0             | 1                                      | 654480                   | 5236                     |
| 0             | 1                                      | 592011                   | 20906                    |
| 0             | 1                                      | 609305                   | 6756                     |

Table 17: Experimental data for the experiment 100421\_page100430\_wt\_il1\_0u1u2u5u10\_pmk2\_pp38

### 2.2.8 Experiment: 100421\_page100430\_wt\_il1\_0u1u2u5u10\_pmk2\_pp38

**Comments** In this experiment the primary hepatocytes were treated with IL-1 $\beta$  doses from 1–10 ng/ml and the internal standard was measured.

**Model fit and plots** The agreement of the model observables and the experimental data, given in Table 17 and 18, yields a value of the objective function  $-2 \log(L) = -96.9426$  for 74 data points in this data set. The model observables and the experimental data is show in Figure 13.

**Observables** The following observables are added in this data set:

- **Observable:** p\_mk2\_au

$$p\_mk2\_au(t) = \text{offset\_gel\_pMK2\_100241\_100430} + [pMK2] \cdot \text{scale\_pMK2\_100241\_100430} \quad (110)$$

Unit: conc. [a.u.]; With error model:

$$\sigma\{p\_mk2\_au\}(t) = \text{sd\_pMK2\_au} \quad (111)$$

- **Observable:** p-p38\_au

$$p\_p38\_au(t) = \text{offset\_gel\_pp38\_100241\_100430} + [pp38] \cdot \text{scale\_pp38\_100241\_100430} \quad (112)$$

Unit: conc. [a.u.]; With error model:

$$\sigma\{p\_p38\_au\}(t) = \text{sd\_pp38\_au} \quad (113)$$



Figure 13: 100421\_page100430\_wt\_il1\_0u1u2u5u10\_pmk2\_pp38 observables and experimental data for the experiment. The observables are displayed as solid lines. The error model that describes the measurement noise is indicated by shades.

| intstd<br>[ $\mu$ L] | int_p_p38_au<br>conc. [a.u.] | int_p_mk2_au<br>conc. [a.u.] |
|----------------------|------------------------------|------------------------------|
| 1                    | 526196                       | 7486                         |
| 5                    | 727135                       | 38881                        |
| 10                   | 1.02843e+06                  | 132803                       |
| 20                   | 1.75768e+06                  | 354564                       |
| 40                   | 3.78369e+06                  | 805892                       |

Table 18: Internal standard for the experiment 100421\_page100430\_wt\_il1\_0u1u2u5u10\_pmk2\_pp38

- **Observable:** `int_p_mk2_au`

$$\text{int\_p\_mk2\_au}(\text{intstd}) = \text{offset\_gel\_pMK2\_100241\_100430} + \frac{\text{scale\_pMK2} \cdot \text{scale\_pMK2\_100241\_100430} \cdot \text{intstd}}{V} \quad (114)$$

Unit: conc. [a.u.]; With error model:

$$\sigma\{\text{int\_p\_mk2\_au}\}(\text{intstd}) = \text{sd\_pMK2\_au} \quad (115)$$

- **Observable:** `int_p_p38_au`

$$\text{int\_p\_p38\_au}(\text{intstd}) = \text{offset\_gel\_pp38\_100241\_100430} + \frac{\text{scale\_pp38} \cdot \text{scale\_pp38\_100241\_100430} \cdot \text{intstd}}{V} \quad (116)$$

Unit: conc. [a.u.]; With error model:

$$\sigma\{\text{int\_p\_p38\_au}\}(\text{intstd}) = \text{sd\_pp38\_au} \quad (117)$$

**Conditions** To evaluate the ODE system of Equation 23 – 27 for the conditions in this experiment, the following parameter transformations are applied:

$$\text{input\_il1b} \rightarrow 1 \mid 10 \mid 2 \mid 5$$

$$\text{scale\_pMK2\_100241\_100430} \rightarrow \frac{\text{scale\_pMK2\_100241\_100430}}{\text{init\_MK2}}$$

$$\text{scale\_pp38\_100241\_100430} \rightarrow \frac{\text{scale\_pp38\_100241\_100430}}{\text{init\_p38}}$$

| time<br>[min] | input_il1b<br>[ng · ml <sup>-1</sup> ] | p_p38_au<br>conc. [a.u.] | p_mk2_au<br>conc. [a.u.] |
|---------------|----------------------------------------|--------------------------|--------------------------|
| 5             | 1                                      | 759356                   | 1.62877e+06              |
| 5             | 2                                      | 911797                   | 1.32369e+06              |
| 5             | 5                                      | 1.10082e+06              | 1.49914e+06              |
| 5             | 10                                     | 1.29946e+06              | 1.75591e+06              |
| 10            | 1                                      | 1.52933e+06              | 1.55353e+06              |
| 10            | 2                                      | 1.63557e+06              | 1.53194e+06              |
| 10            | 5                                      | 1.98894e+06              | 751224                   |
| 10            | 10                                     | 1.97715e+06              | 1.72726e+06              |
| 15            | 1                                      | 1.71820e+06              | 1.07659e+06              |
| 15            | 2                                      | 1.87097e+06              | 2.14204e+06              |
| 15            | 5                                      | 2.20478e+06              | 1.04897e+06              |
| 15            | 10                                     | 2.01690e+06              | 2.22913e+06              |
| 20            | 1                                      | 2.02467e+06              | 1.46725e+06              |
| 20            | 2                                      | 1.35225e+06              | 1.76359e+06              |
| 20            | 5                                      | 1.93808e+06              | 2.09011e+06              |
| 20            | 10                                     | 1.90135e+06              | 2.04503e+06              |
| 30            | 1                                      | 1.58485e+06              | 1.79597e+06              |
| 30            | 2                                      | 1.37374e+06              | 2.00700e+06              |
| 30            | 5                                      | 1.55227e+06              | 1.66012e+06              |
| 30            | 10                                     | 1.45740e+06              | 1.73791e+06              |
| 40            | 1                                      | 1.14096e+06              | 849242                   |
| 40            | 2                                      | 1.11313e+06              | 1.25292e+06              |
| 40            | 5                                      | 1.06826e+06              | 1.59457e+06              |
| 40            | 10                                     | 1.12252e+06              | 1.23639e+06              |
| 60            | 1                                      | 1.03999e+06              | 702862                   |
| 60            | 2                                      | 1.05752e+06              | 1.42231e+06              |
| 60            | 5                                      | 893271                   | 2.00756e+06              |
| 60            | 10                                     | 792604                   | 1.13760e+06              |
| 0             | 1                                      | 594037                   | 792582                   |
| 0             | 1                                      | 560650                   | 1.17330e+06              |
| 0             | 1                                      | 585123                   | 801775                   |
| 0             | 1                                      | 607990                   | 1.07508e+06              |

Table 19: Experimental data for the experiment 100421\_page100505\_wt\_il1\_0u1u2u5u10\_pmk2\_pp38

### 2.2.9 Experiment: 100421\_page100505\_wt\_il1\_0u1u2u5u10\_pmk2\_pp38

**Comments** In this experiment the primary hepatocytes were treated with IL-1 $\beta$  doses from 1–10 ng/ml and the internal standard was measured.

**Model fit and plots** The agreement of the model observables and the experimental data, given in Table 19 and 20, yields a value of the objective function  $-2 \log(L) = -96.2628$  for 74 data points in this data set. The model observables and the experimental data is show in Figure 14.

**Observables** The following observables are added in this data set:

- **Observable:** p\_mk2\_au

$$p\_mk2\_au(t) = \text{offset\_gel\_pMK2\_100241\_100505} + [pMK2] \cdot \text{scale\_pMK2\_100241\_100505} \quad (118)$$

Unit: conc. [a.u.]; With error model:

$$\sigma\{p\_mk2\_au\}(t) = \text{sd\_pMK2\_au} \quad (119)$$

- **Observable:** p\_p38\_au

$$p\_p38\_au(t) = \text{offset\_gel\_pp38\_100241\_100505} + [pp38] \cdot \text{scale\_pp38\_100241\_100505} \quad (120)$$

Unit: conc. [a.u.]; With error model:

$$\sigma\{p\_p38\_au\}(t) = \text{sd\_pp38\_au} \quad (121)$$



Figure 14: 100421\_page100505\_wt\_il1\_0u1u2u5u10\_pmk2\_pp38 observables and experimental data for the experiment. The observables are displayed as solid lines. The error model that describes the measurement noise is indicated by shades.

| intstd<br>[ $\mu\text{L}$ ] | int_p_p38_au<br>conc. [a.u.] | int_p_mk2_au<br>conc. [a.u.] |
|-----------------------------|------------------------------|------------------------------|
| 1                           | 546004                       | 375348                       |
| 5                           | 1.20220e+06                  | 1.05445e+06                  |
| 10                          | 1.84295e+06                  | 1.29914e+06                  |
| 20                          | 3.56130e+06                  | 2.87569e+06                  |
| 40                          | 5.58367e+06                  | 5.06114e+06                  |

Table 20: Internal standard for the experiment 100421\_page100505\_wt\_il1\_0u1u2u5u10\_pmk2\_pp38

- **Observable:** `int_p_mk2_au`

$$\text{int\_p\_mk2\_au}(\text{intstd}) = \text{offset\_gel\_pMK2\_100241\_100505} + \frac{\text{scale\_pMK2} \cdot \text{scale\_pMK2\_100241\_100505} \cdot \text{intstd}}{V} \quad (122)$$

Unit: conc. [a.u.]; With error model:

$$\sigma\{\text{int\_p\_mk2\_au}\}(\text{intstd}) = \text{sd\_pMK2\_au} \quad (123)$$

- **Observable:** `int_p_p38_au`

$$\text{int\_p\_p38\_au}(\text{intstd}) = \text{offset\_gel\_pp38\_100241\_100505} + \frac{\text{scale\_pp38} \cdot \text{scale\_pp38\_100241\_100505} \cdot \text{intstd}}{V} \quad (124)$$

Unit: conc. [a.u.]; With error model:

$$\sigma\{\text{int\_p\_p38\_au}\}(\text{intstd}) = \text{sd\_pp38\_au} \quad (125)$$

**Conditions** To evaluate the ODE system of Equation 23 – 27 for the conditions in this experiment, the following parameter transformations are applied:

$$\text{input\_il1b} \rightarrow 1 \mid 10 \mid 2 \mid 5$$

$$\text{scale\_pMK2\_100241\_100505} \rightarrow \frac{\text{scale\_pMK2\_100241\_100505}}{\text{init\_MK2}}$$

$$\text{scale\_pp38\_100241\_100505} \rightarrow \frac{\text{scale\_pp38\_100241\_100505}}{\text{init\_p38}}$$

| time<br>[min] | input_il1b<br>[ng · ml <sup>-1</sup> ] | p_p38_au<br>conc. [a.u.] | p_mk2_au<br>conc. [a.u.] |
|---------------|----------------------------------------|--------------------------|--------------------------|
| 5             | 0.1                                    | 655788                   | 1.23377e+06              |
| 5             | 0.2                                    | 680181                   | 1.20598e+06              |
| 5             | 0.5                                    | 670694                   | 1.39637e+06              |
| 5             | 1                                      | 902767                   | 1.39392e+06              |
| 10            | 0.1                                    | 743838                   | 1.24324e+06              |
| 10            | 0.2                                    | 803710                   | 1.63004e+06              |
| 10            | 0.5                                    | 976969                   | 1.91712e+06              |
| 10            | 1                                      | 1.14049e+06              | 2.02172e+06              |
| 15            | 0.1                                    | 886648                   | 1.34560e+06              |
| 15            | 0.2                                    | 833157                   | 1.68593e+06              |
| 15            | 0.5                                    | 927728                   | 1.87098e+06              |
| 15            | 1                                      | 1.16055e+06              | 2.08684e+06              |
| 20            | 0.1                                    | 795094                   | 1.33514e+06              |
| 20            | 0.2                                    | 933583                   | 1.73856e+06              |
| 20            | 0.5                                    | 1.06691e+06              | 2.20341e+06              |
| 20            | 1                                      | 1.12970e+06              | 2.11432e+06              |
| 30            | 0.1                                    | 707073                   | 1.59443e+06              |
| 30            | 0.2                                    | 881612                   | 1.57580e+06              |
| 30            | 0.5                                    | 1.05158e+06              | 2.46336e+06              |
| 30            | 1                                      | 1.02165e+06              | 2.21556e+06              |
| 40            | 0.1                                    | 743265                   | 1.37064e+06              |
| 40            | 0.2                                    | 829158                   | 1.79449e+06              |
| 40            | 0.5                                    | 871513                   | 2.14972e+06              |
| 40            | 1                                      | 747174                   | 1.85104e+06              |
| 60            | 0.1                                    | 844785                   | 1.32768e+06              |
| 60            | 0.2                                    | 736592                   | 1.36100e+06              |
| 60            | 0.5                                    | 745767                   | 1.44543e+06              |
| 60            | 1                                      | 726370                   | 1.66707e+06              |
| 0             | 0.1                                    | 640530                   | 980406                   |
| 0             | 0.1                                    | 637960                   | 863996                   |
| 0             | 0.1                                    | 712929                   | 942422                   |
| 0             | 0.1                                    | 591955                   | 780806                   |

Table 21: Experimental data for the experiment 100504\_page100527\_wt\_il1\_0u01u02u05u1\_pmK2\_pp38

### 2.2.10 Experiment: 100504\_page100527\_wt\_il1\_0u01u02u05u1\_pmK2\_pp38

**Comments** In this experiment the primary hepatocytes were treated with IL-1 $\beta$  doses from 0.1–1 ng/ml and the internal standard was measured.

**Model fit and plots** The agreement of the model observables and the experimental data, given in Table 21 and 21, yields a value of the objective function  $-2 \log(L) = -150.792$  for 74 data points in this data set. The model observables and the experimental data is show in Figure 15.

**Observables** The following observables are added in this data set:

- **Observable:** p\_mk2\_au

$$p\_mk2\_au(t) = \text{offset\_gel\_pMK2\_100504\_100527} + [pMK2] \cdot \text{scale\_pMK2\_100504\_100527} \quad (126)$$

Unit: conc. [a.u.]; With error model:

$$\sigma\{p\_mk2\_au\}(t) = \text{sd\_pMK2\_au} \quad (127)$$

- **Observable:** p\_p38\_au

$$p\_p38\_au(t) = \text{offset\_gel\_pp38\_100504\_100527} + [pp38] \cdot \text{scale\_pp38\_100504\_100527} \quad (128)$$

Unit: conc. [a.u.]; With error model:

$$\sigma\{p\_p38\_au\}(t) = \text{sd\_pp38\_au} \quad (129)$$



Figure 15: 100504\_page100527\_wt\_il1\_0u01u02u05u1\_pmk2\_pp38 observables and experimental data for the experiment. The observables are displayed as solid lines. The error model that describes the measurement noise is indicated by shades.

| intstd<br>[ $\mu\text{L}$ ] | int_p_p38_au<br>conc. [a.u.] | int_p_mk2_au<br>conc. [a.u.] |
|-----------------------------|------------------------------|------------------------------|
| 1                           | 788202                       | 520015                       |
| 5                           | 823964                       | 1.03403e+06                  |
| 10                          | 1.26961e+06                  | 1.53923e+06                  |
| 20                          | 1.85502e+06                  | 3.28215e+06                  |
| 40                          | 3.32714e+06                  | 5.64156e+06                  |

Table 22: Internal standard for the experiment 100504\_page100527\_wt\_il1\_0u01u02u05u1\_pmk2\_pp38

- **Observable:** `int_p_mk2_au`

$$\text{int\_p\_mk2\_au}(\text{intstd}) = \text{offset\_gel\_pMK2\_100504\_100527} + \frac{\text{scale\_pMK2} \cdot \text{scale\_pMK2\_100504\_100527} \cdot \text{intstd}}{V} \quad (130)$$

Unit: conc. [a.u.]; With error model:

$$\sigma\{\text{int\_p\_mk2\_au}\}(\text{intstd}) = \text{sd\_pMK2\_au} \quad (131)$$

- **Observable:** `int_p_p38_au`

$$\text{int\_p\_p38\_au}(\text{intstd}) = \text{offset\_gel\_pp38\_100504\_100527} + \frac{\text{scale\_pp38} \cdot \text{scale\_pp38\_100504\_100527} \cdot \text{intstd}}{V} \quad (132)$$

Unit: conc. [a.u.]; With error model:

$$\sigma\{\text{int\_p\_p38\_au}\}(\text{intstd}) = \text{sd\_pp38\_au} \quad (133)$$

**Conditions** To evaluate the ODE system of Equation 23 – 27 for the conditions in this experiment, the following parameter transformations are applied:

$$\text{input\_il1b} \rightarrow 0.1 \mid 0.2 \mid 0.5 \mid 1$$

$$\text{scale\_pMK2\_100504\_100527} \rightarrow \frac{\text{scale\_pMK2\_100504\_100527}}{\text{init\_MK2}}$$

$$\text{scale\_pp38\_100504\_100527} \rightarrow \frac{\text{scale\_pp38\_100504\_100527}}{\text{init\_p38}}$$

| time<br>[min] | input_il1b<br>[ng · ml <sup>-1</sup> ] | p_p38_au<br>conc. [a.u.] | p_mk2_au<br>conc. [a.u.] |
|---------------|----------------------------------------|--------------------------|--------------------------|
| 5             | 0.1                                    | 550897                   | 646582                   |
| 5             | 0.2                                    | 593221                   | 954446                   |
| 5             | 0.5                                    | 779551                   | 923157                   |
| 5             | 1                                      | 848287                   | 938554                   |
| 10            | 0.1                                    | 754585                   | 922032                   |
| 10            | 0.2                                    | 866653                   | 628859                   |
| 10            | 0.5                                    | 1.27894e+06              | 1.20937e+06              |
| 10            | 1                                      | 1.57159e+06              | 1.46954e+06              |
| 15            | 0.1                                    | 777535                   | 710791                   |
| 15            | 0.2                                    | 1.06002e+06              | 1.17807e+06              |
| 15            | 0.5                                    | 1.53187e+06              | 1.33487e+06              |
| 15            | 1                                      | 1.95532e+06              | 1.80957e+06              |
| 20            | 0.1                                    | 807512                   | 916207                   |
| 20            | 0.2                                    | 1.47264e+06              | 1.27341e+06              |
| 20            | 0.5                                    | 1.86917e+06              | 1.61236e+06              |
| 20            | 1                                      | 2.07454e+06              | 1.80864e+06              |
| 30            | 0.1                                    | 966461                   | 1.07429e+06              |
| 30            | 0.2                                    | 1.08517e+06              | 1.45219e+06              |
| 30            | 0.5                                    | 1.83886e+06              | 1.61689e+06              |
| 30            | 1                                      | 1.72210e+06              | 1.46825e+06              |
| 40            | 0.1                                    | 788372                   | 1.08898e+06              |
| 40            | 0.2                                    | 968676                   | 1.18565e+06              |
| 40            | 0.5                                    | 1.21770e+06              | 1.28502e+06              |
| 40            | 1                                      | 1.03184e+06              | 1.16326e+06              |
| 60            | 0.1                                    | 672987                   | 1.00642e+06              |
| 60            | 0.2                                    | 837162                   | 1.18775e+06              |
| 60            | 0.5                                    | 852687                   | 1.10349e+06              |
| 60            | 1                                      | 767548                   | 1.22126e+06              |
| 0             | 0.1                                    | 444955                   | 695275                   |
| 0             | 0.1                                    | 438132                   | 618163                   |
| 0             | 0.1                                    | 484372                   | 861630                   |
| 0             | 0.1                                    | 479522                   | 745207                   |

Table 23: Experimental data for the experiment 100504\_pagedate100512\_wt\_il1\_0u01u02u05u1\_pmk2\_pp38

### 2.2.11 Experiment: 100504\_pagedate100512\_wt\_il1\_0u01u02u05u1\_pmk2\_pp38

**Comments** In this experiment the primary hepatocytes were treated with IL-1 $\beta$  doses from 0.1–1 ng/ml and the internal standard was measured.

**Model fit and plots** The agreement of the model observables and the experimental data, given in Table 23 and 24, yields a value of the objective function  $-2 \log(L) = -126.257$  for 74 data points in this data set. The model observables and the experimental data is show in Figure 16.

**Observables** The following observables are added in this data set:

- **Observable:** p\_mk2\_au

$$p\_mk2\_au(t) = \text{offset\_gel\_pMK2\_100504\_100512} + [pMK2] \cdot \text{scale\_pMK2\_100504\_100512} \quad (134)$$

Unit: conc. [a.u.]; With error model:

$$\sigma\{p\_mk2\_au\}(t) = \text{sd\_pMK2\_au} \quad (135)$$

- **Observable:** p\_p38\_au

$$p\_p38\_au(t) = \text{offset\_gel\_pp38\_100504\_100512} + [pp38] \cdot \text{scale\_pp38\_100504\_100512} \quad (136)$$

Unit: conc. [a.u.]; With error model:

$$\sigma\{p\_p38\_au\}(t) = \text{sd\_pp38\_au} \quad (137)$$



Figure 16: 100504\_pagedate100512\_wt\_il1\_0u01u02u05u1\_pmk2\_pp38 observables and experimental data for the experiment. The observables are displayed as solid lines. The error model that describes the measurement noise is indicated by shades.

| intstd<br>[ $\mu$ L] | int_p_p38_au<br>conc. [a.u.] | int_p_mk2_au<br>conc. [a.u.] |
|----------------------|------------------------------|------------------------------|
| 1                    | 341090                       | 526025                       |
| 5                    | 919734                       | 577067                       |
| 10                   | 1.19395e+06                  | 643572                       |
| 20                   | 2.48881e+06                  | 1.93437e+06                  |
| 40                   | 4.42954e+06                  | 4.16300e+06                  |

Table 24: Internal standard for the experiment 100504\_pagedate100512\_wt\_il1\_0u01u02u05u1\_pmk2\_pp38

- **Observable:** `int_p_mk2_au`

$$\text{int\_p\_mk2\_au}(\text{intstd}) = \text{offset\_gel\_pMK2\_100504\_100512} + \frac{\text{scale\_pMK2} \cdot \text{scale\_pMK2\_100504\_100512} \cdot \text{intstd}}{V} \quad (138)$$

Unit: conc. [a.u.]; With error model:

$$\sigma\{\text{int\_p\_mk2\_au}\}(\text{intstd}) = \text{sd\_pMK2\_au} \quad (139)$$

- **Observable:** `int_p_p38_au`

$$\text{int\_p\_p38\_au}(\text{intstd}) = \text{offset\_gel\_pp38\_100504\_100512} + \frac{\text{scale\_pp38} \cdot \text{scale\_pp38\_100504\_100512} \cdot \text{intstd}}{V} \quad (140)$$

Unit: conc. [a.u.]; With error model:

$$\sigma\{\text{int\_p\_p38\_au}\}(\text{intstd}) = \text{sd\_pp38\_au} \quad (141)$$

**Conditions** To evaluate the ODE system of Equation 23 – 27 for the conditions in this experiment, the following parameter transformations are applied:

$$\text{input\_il1b} \rightarrow 0.1 \mid 0.2 \mid 0.5 \mid 1$$

$$\text{scale\_pMK2\_100504\_100512} \rightarrow \frac{\text{scale\_pMK2\_100504\_100512}}{\text{init\_MK2}}$$

$$\text{scale\_pp38\_100504\_100512} \rightarrow \frac{\text{scale\_pp38\_100504\_100512}}{\text{init\_p38}}$$

| time<br>[min] | input_il1b<br>[ng · ml <sup>-1</sup> ] | p_p38_au<br>conc. [a.u.] | p_mk2_au<br>conc. [a.u.] |
|---------------|----------------------------------------|--------------------------|--------------------------|
| 5             | 0.1                                    | 550897                   | 646582                   |
| 5             | 0.2                                    | 593221                   | 954446                   |
| 5             | 0.5                                    | 779551                   | 923157                   |
| 5             | 1                                      | 848287                   | 938554                   |
| 10            | 0.1                                    | 754585                   | 922032                   |
| 10            | 0.2                                    | 866653                   | 628859                   |
| 10            | 0.5                                    | 1.27894e+06              | 1.20937e+06              |
| 10            | 1                                      | 1.57159e+06              | 1.46954e+06              |
| 15            | 0.1                                    | 777535                   | 710791                   |
| 15            | 0.2                                    | 1.06002e+06              | 1.17807e+06              |
| 15            | 0.5                                    | 1.53187e+06              | 1.33487e+06              |
| 15            | 1                                      | 1.95532e+06              | 1.80957e+06              |
| 20            | 0.1                                    | 807512                   | 916207                   |
| 20            | 0.2                                    | 1.47264e+06              | 1.27341e+06              |
| 20            | 0.5                                    | 1.86917e+06              | 1.61236e+06              |
| 20            | 1                                      | 2.07454e+06              | 1.80864e+06              |
| 30            | 0.1                                    | 966461                   | 1.07429e+06              |
| 30            | 0.2                                    | 1.08517e+06              | 1.45219e+06              |
| 30            | 0.5                                    | 1.83886e+06              | 1.61689e+06              |
| 30            | 1                                      | 1.72210e+06              | 1.46825e+06              |
| 40            | 0.1                                    | 788372                   | 1.08898e+06              |
| 40            | 0.2                                    | 968676                   | 1.18565e+06              |
| 40            | 0.5                                    | 1.21770e+06              | 1.28502e+06              |
| 40            | 1                                      | 1.03184e+06              | 1.16326e+06              |
| 60            | 0.1                                    | 672987                   | 1.00642e+06              |
| 60            | 0.2                                    | 837162                   | 1.18775e+06              |
| 60            | 0.5                                    | 852687                   | 1.10349e+06              |
| 60            | 1                                      | 767548                   | 1.22126e+06              |
| 0             | 0.1                                    | 444955                   | 695275                   |
| 0             | 0.1                                    | 438132                   | 618163                   |
| 0             | 0.1                                    | 484372                   | 861630                   |
| 0             | 0.1                                    | 479522                   | 745207                   |

Table 25: Experimental data for the experiment 100504\_pagedate100520\_wt\_il1\_0u01u02u05u1\_pmk2\_pp38

### 2.2.12 Experiment: 100504\_pagedate100520\_wt\_il1\_0u01u02u05u1\_pmk2\_pp38

**Comments** In this experiment the primary hepatocytes were treated with IL-1 $\beta$  doses from 0.1–1 ng/ml and the internal standard was measured.

**Model fit and plots** The agreement of the model observables and the experimental data, given in Table 25 and 26, yields a value of the objective function  $-2 \log(L) = -92.2201$  for 74 data points in this data set. The model observables and the experimental data is show in Figure 17.

**Observables** The following observables are added in this data set:

- **Observable:** p\_mk2\_au

$$p\_mk2\_au(t) = \text{offset\_gel\_pMK2\_100504\_100520} + [pMK2] \cdot \text{scale\_pMK2\_100504\_100520} \quad (142)$$

Unit: conc. [a.u.]; With error model:

$$\sigma\{p\_mk2\_au\}(t) = \text{sd\_pMK2\_au} \quad (143)$$

- **Observable:** p\_p38\_au

$$p\_p38\_au(t) = \text{offset\_gel\_pp38\_100504\_100520} + [pp38] \cdot \text{scale\_pp38\_100504\_100520} \quad (144)$$

Unit: conc. [a.u.]; With error model:

$$\sigma\{p\_p38\_au\}(t) = \text{sd\_pp38\_au} \quad (145)$$



Figure 17: 100504\_pagedate100520\_wt\_il1\_0u01u02u05u1\_pmk2\_pp38 observables and experimental data for the experiment. The observables are displayed as solid lines. The error model that describes the measurement noise is indicated by shades.

| intstd<br>[ $\mu\text{L}$ ] | int_p_p38_au<br>conc. [a.u.] | int_p_mk2_au<br>conc. [a.u.] |
|-----------------------------|------------------------------|------------------------------|
| 1                           | 341090                       | 526025                       |
| 5                           | 919734                       | 577067                       |
| 10                          | 1.19395e+06                  | 643572                       |
| 20                          | 2.48881e+06                  | 1.93437e+06                  |
| 40                          | 4.42954e+06                  | 4.16300e+06                  |

Table 26: Internal standard for the experiment 100504\_pagedate100520\_wt\_il1\_0u01u02u05u1\_pmk2\_pp38

- **Observable:** `int_p_mk2_au`

$$\text{int\_p\_mk2\_au}(\text{intstd}) = \text{offset\_gel\_pMK2\_100504\_100520} + \frac{\text{scale\_pMK2} \cdot \text{scale\_pMK2\_100504\_100520} \cdot \text{intstd}}{V} \quad (146)$$

Unit: conc. [a.u.]; With error model:

$$\sigma\{\text{int\_p\_mk2\_au}\}(\text{intstd}) = \text{sd\_pMK2\_au} \quad (147)$$

- **Observable:** `int_p_p38_au`

$$\text{int\_p\_p38\_au}(\text{intstd}) = \text{offset\_gel\_pp38\_100504\_100520} + \frac{\text{scale\_pp38} \cdot \text{scale\_pp38\_100504\_100520} \cdot \text{intstd}}{V} \quad (148)$$

Unit: conc. [a.u.]; With error model:

$$\sigma\{\text{int\_p\_p38\_au}\}(\text{intstd}) = \text{sd\_pp38\_au} \quad (149)$$

**Conditions** To evaluate the ODE system of Equation 23 – 27 for the conditions in this experiment, the following parameter transformations are applied:

$$\text{input\_il1b} \rightarrow 0.1 \mid 0.2 \mid 0.5 \mid 1$$

$$\text{scale\_pMK2\_100504\_100520} \rightarrow \frac{\text{scale\_pMK2\_100504\_100520}}{\text{init\_MK2}}$$

$$\text{scale\_pp38\_100504\_100520} \rightarrow \frac{\text{scale\_pp38\_100504\_100520}}{\text{init\_p38}}$$

| time<br>[min] | input_il1b<br>[ng · ml <sup>-1</sup> ] | p_p38_au<br>conc. [a.u.] | p_mk2_au<br>conc. [a.u.] |
|---------------|----------------------------------------|--------------------------|--------------------------|
| 5             | 0.1                                    | 611388                   | 1.31108e+06              |
| 5             | 0.2                                    | 700501                   | 1.27185e+06              |
| 5             | 0.5                                    | 843973                   | 1.20029e+06              |
| 5             | 1                                      | 953226                   | 1.53775e+06              |
| 10            | 0.1                                    | 627227                   | 1.59945e+06              |
| 10            | 0.2                                    | 793338                   | 1.48103e+06              |
| 10            | 0.5                                    | 1.01861e+06              | 2.03053e+06              |
| 10            | 1                                      | 808778                   | 1.91912e+06              |
| 15            | 0.1                                    | 705661                   | 1.42510e+06              |
| 15            | 0.2                                    | 514395                   | 1.82443e+06              |
| 15            | 0.5                                    | 5.64022e+06              | 2.37820e+06              |
| 15            | 1                                      | 1.55542e+06              | 2.12796e+06              |
| 20            | 0.1                                    | 858252                   | 1.53842e+06              |
| 20            | 0.2                                    | 550771                   | 1.90316e+06              |
| 20            | 0.5                                    | 1.35245e+06              | 1.91573e+06              |
| 20            | 1                                      | 1.53784e+06              | 2.40599e+06              |
| 30            | 0.1                                    | 675127                   | 1.78579e+06              |
| 30            | 0.2                                    | 1.06472e+06              | 1.76892e+06              |
| 30            | 0.5                                    | 663295                   | 2.41105e+06              |
| 30            | 1                                      | 1.48249e+06              | 2.02300e+06              |
| 40            | 0.1                                    | 1.32378e+06              | 1.62853e+06              |
| 40            | 0.2                                    | 752021                   | 1.58714e+06              |
| 40            | 0.5                                    | 1.08471e+06              | 2.24647e+06              |
| 40            | 1                                      | 847625                   | 1.95800e+06              |
| 60            | 0.1                                    | 746054                   | 1.07998e+06              |
| 60            | 0.2                                    | 864440                   | 1.24344e+06              |
| 60            | 0.5                                    | 793432                   | 1.54367e+06              |
| 60            | 1                                      | 1.16038e+06              | 1.65111e+06              |
| 0             | 0.1                                    | 857935                   | 932919                   |
| 0             | 0.1                                    | 572159                   | 903869                   |
| 0             | 0.1                                    | 978195                   | 1.08669e+06              |
| 0             | 0.1                                    | 503616                   | 959204                   |

Table 27: Experimental data for the experiment 100517\_page100610a\_wt\_il1\_0u001u005u01u02\_pmk2\_pp38

### 2.2.13 Experiment: 100517\_page100610a\_wt\_il1\_0u001u005u01u02\_pmk2\_pp38

**Comments** In this experiment the primary hepatocytes were treated with IL-1 $\beta$  doses from 0.01–0.2 ng/ml and the internal standard was measured.

**Model fit and plots** The agreement of the model observables and the experimental data, given in Table 27 and 28, yields a value of the objective function  $-2 \log(L) = -134.815$  for 74 data points in this data set. The model observables and the experimental data is show in Figure 18.

**Observables** The following observables are added in this data set:

- **Observable:** p\_mk2\_au

$$p\_mk2\_au(t) = \text{offset\_gel\_pMK2\_100517\_100610a} + [pMK2] \cdot \text{scale\_pMK2\_100517\_100610a} \quad (150)$$

Unit: conc. [a.u.]; With error model:

$$\sigma\{p\_mk2\_au\}(t) = \text{sd\_pMK2\_au} \quad (151)$$

- **Observable:** p\_p38\_au

$$p\_p38\_au(t) = \text{offset\_gel\_pp38\_100517\_100610a} + [pp38] \cdot \text{scale\_pp38\_100517\_100610a} \quad (152)$$

Unit: conc. [a.u.]; With error model:

$$\sigma\{p\_p38\_au\}(t) = \text{sd\_pp38\_au} \quad (153)$$



Figure 18: 100517\_page100610a\_wt\_il1\_0u001u005u01u02\_pmK2\_pp38 observables and experimental data for the experiment. The observables are displayed as solid lines. The error model that describes the measurement noise is indicated by shades.

| intstd<br>[μL] | int_p_p38_au<br>conc. [a.u.] | int_p_mk2_au<br>conc. [a.u.] |
|----------------|------------------------------|------------------------------|
| 1              | 575955                       | 610735                       |
| 5              | 684132                       | 1.11098e+06                  |
| 10             | 1.67026e+06                  | 1.61732e+06                  |
| 20             | 2.92129e+06                  | 2.89679e+06                  |
| 40             | 1.21973e+06                  | 7.45377e+06                  |

Table 28: Internal standard for the experiment 100517\_page100610a\_wt\_il1\_0u001u005u01u02\_pmK2\_pp38

- **Observable:** `int_p_mk2_au`

$$\text{int\_p\_mk2\_au}(\text{intstd}) = \text{offset\_gel\_pMK2\_100517\_100610a} + \frac{\text{scale\_pMK2} \cdot \text{scale\_pMK2\_100517\_100610a} \cdot \text{intstd}}{V} \quad (154)$$

Unit: conc. [a.u.]; With error model:

$$\sigma\{\text{int\_p\_mk2\_au}\}(\text{intstd}) = \text{sd\_pMK2\_au} \quad (155)$$

- **Observable:** `int_p_p38_au`

$$\text{int\_p\_p38\_au}(\text{intstd}) = \text{offset\_gel\_pp38\_100517\_100610a} + \frac{\text{scale\_pp38} \cdot \text{scale\_pp38\_100517\_100610a} \cdot \text{intstd}}{V} \quad (156)$$

Unit: conc. [a.u.]; With error model:

$$\sigma\{\text{int\_p\_p38\_au}\}(\text{intstd}) = \text{sd\_pp38\_au} \quad (157)$$

**Conditions** To evaluate the ODE system of Equation 23 – 27 for the conditions in this experiment, the following parameter transformations are applied:

$$\text{input\_il1b} \rightarrow 0.01 \mid 0.05 \mid 0.1 \mid 0.2$$

$$\text{scale\_pMK2\_100517\_100610a} \rightarrow \frac{\text{scale\_pMK2\_100517\_100610a}}{\text{init\_MK2}}$$

$$\text{scale\_pp38\_100517\_100610a} \rightarrow \frac{\text{scale\_pp38\_100517\_100610a}}{\text{init\_p38}}$$

| time<br>[min] | input_il1b<br>[ng · ml <sup>-1</sup> ] | p_p38_au<br>conc. [a.u.] | p_mk2_au<br>conc. [a.u.] |
|---------------|----------------------------------------|--------------------------|--------------------------|
| 5             | 0                                      | 512904                   | 1.21761e+06              |
| 5             | 0.1                                    | 655351                   | 1.04402e+06              |
| 5             | 0.1                                    | 786666                   | 1.23575e+06              |
| 5             | 0.2                                    | 622180                   | 1.19598e+06              |
| 10            | 0                                      | 669629                   | 1.20979e+06              |
| 10            | 0.1                                    | 740234                   | 1.21667e+06              |
| 10            | 0.1                                    | 687462                   | 1.03375e+06              |
| 10            | 0.2                                    | 666854                   | 1.14704e+06              |
| 15            | 0                                      | 1.01786e+06              | 1.33826e+06              |
| 15            | 0.1                                    | 583867                   | 1.25687e+06              |
| 15            | 0.1                                    | 630434                   | 1.04149e+06              |
| 15            | 0.2                                    | 567266                   | 1.08303e+06              |
| 20            | 0                                      | 916585                   | 1.43808e+06              |
| 20            | 0.1                                    | 830774                   | 1.12124e+06              |
| 20            | 0.1                                    | 877106                   | 1.09974e+06              |
| 20            | 0.2                                    | 623863                   | 944999                   |
| 30            | 0                                      | 836922                   | 1.27386e+06              |
| 30            | 0.1                                    | 756458                   | 1.22893e+06              |
| 30            | 0.1                                    | 620519                   | 1.01399e+06              |
| 30            | 0.2                                    | 624886                   | 1.05330e+06              |
| 40            | 0                                      | 876375                   | 1.51971e+06              |
| 40            | 0.1                                    | 678762                   | 1.27345e+06              |
| 40            | 0.1                                    | 658906                   | 1.09799e+06              |
| 40            | 0.2                                    | 536348                   | 931296                   |
| 60            | 0                                      | 766241                   | 1.12814e+06              |
| 60            | 0.1                                    | 691864                   | 1.17149e+06              |
| 60            | 0.1                                    | 569824                   | 1.17547e+06              |
| 60            | 0.2                                    | 515089                   | 1.04646e+06              |
| 0             | 0                                      | 583520                   | 950892                   |
| 0             | 0                                      | 546991                   | 938847                   |
| 0             | 0                                      | 522963                   | 940606                   |
| 0             | 0                                      | 556109                   | 999735                   |

Table 29: Experimental data for the experiment 100517\_page100610b\_wt\_il1\_0u001u005u01u02\_pmK2\_pp38

### 2.2.14 Experiment: 100517\_page100610b\_wt\_il1\_0u001u005u01u02\_pmK2\_pp38

**Comments** In this experiment the primary hepatocytes were treated with IL-1 $\beta$  doses from 0.01–0.2 ng/ml and the internal standard was measured.

**Model fit and plots** The agreement of the model observables and the experimental data, given in Table 29 and 30, yields a value of the objective function  $-2\log(L) = -131.12$  for 74 data points in this data set. The model observables and the experimental data is show in Figure 19.

**Observables** The following observables are added in this data set:

- **Observable:** p\_mk2\_au

$$p\_mk2\_au(t) = \text{offset\_gel\_pMK2\_100517\_100610b} + [pMK2] \cdot \text{scale\_pMK2\_100517\_100610b} \quad (158)$$

Unit: conc. [a.u.]; With error model:

$$\sigma\{p\_mk2\_au\}(t) = \text{sd\_pMK2\_au} \quad (159)$$

- **Observable:** p\_p38\_au

$$p\_p38\_au(t) = \text{offset\_gel\_pp38\_100517\_100610b} + [pp38] \cdot \text{scale\_pp38\_100517\_100610b} \quad (160)$$

Unit: conc. [a.u.]; With error model:

$$\sigma\{p\_p38\_au\}(t) = \text{sd\_pp38\_au} \quad (161)$$



Figure 19: 100517\_page100610b\_wt\_il1\_0u001u005u01u02\_pmk2\_pp38 observables and experimental data for the experiment. The observables are displayed as solid lines. The error model that describes the measurement noise is indicated by shades.

| intstd<br>[μL] | int_p_p38_au<br>conc. [a.u.] | int_p_mk2_au<br>conc. [a.u.] |
|----------------|------------------------------|------------------------------|
| 1              | 395377                       | 809644                       |
| 5              | 682798                       | 754921                       |
| 10             | 1.04934e+06                  | 1.38762e+06                  |
| 20             | 1.85184e+06                  | 2.16022e+06                  |
| 40             | 3.73713e+06                  | 3.58624e+06                  |

Table 30: Internal standard for the experiment 100517\_page100610b\_wt\_il1\_0u001u005u01u02\_pmk2\_pp38

- **Observable:** `int_p_mk2_au`

$$\text{int\_p\_mk2\_au}(\text{intstd}) = \text{offset\_gel\_pMK2\_100517\_100610b} + \frac{\text{scale\_pMK2} \cdot \text{scale\_pMK2\_100517\_100610b} \cdot \text{intstd}}{V} \quad (162)$$

Unit: conc. [a.u.]; With error model:

$$\sigma\{\text{int\_p\_mk2\_au}\}(\text{intstd}) = \text{sd\_pMK2\_au} \quad (163)$$

- **Observable:** `int_p_p38_au`

$$\text{int\_p\_p38\_au}(\text{intstd}) = \text{offset\_gel\_pp38\_100517\_100610b} + \frac{\text{scale\_pp38} \cdot \text{scale\_pp38\_100517\_100610b} \cdot \text{intstd}}{V} \quad (164)$$

Unit: conc. [a.u.]; With error model:

$$\sigma\{\text{int\_p\_p38\_au}\}(\text{intstd}) = \text{sd\_pp38\_au} \quad (165)$$

**Conditions** To evaluate the ODE system of Equation 23 – 27 for the conditions in this experiment, the following parameter transformations are applied:

$$\text{input\_il1b} \rightarrow 0.01 \mid 0.05 \mid 0.1 \mid 0.2$$

$$\text{scale\_pMK2\_100517\_100610b} \rightarrow \frac{\text{scale\_pMK2\_100517\_100610b}}{\text{init\_MK2}}$$

$$\text{scale\_pp38\_100517\_100610b} \rightarrow \frac{\text{scale\_pp38\_100517\_100610b}}{\text{init\_p38}}$$

| time<br>[min] | input_il1b<br>[ng · ml <sup>-1</sup> ] | p_p38_au<br>conc. [a.u.] | p_mk2_au<br>conc. [a.u.] |
|---------------|----------------------------------------|--------------------------|--------------------------|
| 5             | 0.1                                    | 722748                   | 1.23312e+06              |
| 5             | 0.2                                    | 853284                   | 1.41382e+06              |
| 5             | 0.5                                    | 795463                   | 1.31188e+06              |
| 5             | 1                                      | 729087                   | 1.31844e+06              |
| 10            | 0.1                                    | 890756                   | 1.28138e+06              |
| 10            | 0.2                                    | 940408                   | 1.48264e+06              |
| 10            | 0.5                                    | 940873                   | 1.64226e+06              |
| 10            | 1                                      | 1.12751e+06              | 1.95073e+06              |
| 15            | 0.1                                    | 910431                   | 1.56493e+06              |
| 15            | 0.2                                    | 976939                   | 1.67838e+06              |
| 15            | 0.5                                    | 1.15763e+06              | 2.00292e+06              |
| 15            | 1                                      | 883537                   | 1.82138e+06              |
| 20            | 0.1                                    | 845467                   | 1.37735e+06              |
| 20            | 0.2                                    | 898157                   | 1.80550e+06              |
| 20            | 0.5                                    | 1.30277e+06              | 2.15814e+06              |
| 20            | 1                                      | 1.11108e+06              | 2.10824e+06              |
| 30            | 0.1                                    | 838474                   | 1.38483e+06              |
| 30            | 0.2                                    | 821183                   | 1.46551e+06              |
| 30            | 0.5                                    | 1.25536e+06              | 1.92678e+06              |
| 30            | 1                                      | 862630                   | 1.74131e+06              |
| 40            | 0.1                                    | 929900                   | 1.46569e+06              |
| 40            | 0.2                                    | 943543                   | 1.69050e+06              |
| 40            | 0.5                                    | 833884                   | 1.62309e+06              |
| 40            | 1                                      | 884284                   | 1.68571e+06              |
| 60            | 0.1                                    | 742860                   | 1.35426e+06              |
| 60            | 0.2                                    | 680502                   | 1.31949e+06              |
| 60            | 0.5                                    | 1.06434e+06              | 1.80862e+06              |
| 60            | 1                                      | 627056                   | 1.69537e+06              |
| 0             | 0.1                                    | 688344                   | 1.07255e+06              |
| 0             | 0.1                                    | 848932                   | 1.29901e+06              |

Table 31: Experimental data for the experiment 100628b\_page100727\_wt\_il1\_0u01u02u05u1\_pmk2\_pp38

### 2.2.15 Experiment: 100628b\_page100727\_wt\_il1\_0u01u02u05u1\_pmk2\_pp38

**Comments** In this experiment the primary hepatocytes were treated with IL-1 $\beta$  doses from 0.1–1 ng/ml and the internal standard was measured.

**Model fit and plots** The agreement of the model observables and the experimental data, given in Table 31 and 32, yields a value of the objective function  $-2\log(L) = -128.85$  for 70 data points in this data set. The model observables and the experimental data is show in Figure 20.

**Observables** The following observables are added in this data set:

- **Observable:** p\_mk2\_au

$$p\_mk2\_au(t) = \text{offset\_gel\_pMK2\_100628b\_100727} + [pMK2] \cdot \text{scale\_pMK2\_100628b\_100727} \quad (166)$$

| intstd<br>[ $\mu$ L] | int_p_p38_au<br>conc. [a.u.] | int_p_mk2_au<br>conc. [a.u.] |
|----------------------|------------------------------|------------------------------|
| 1                    | 853993                       | 1.06075e+06                  |
| 5                    | 1.22405e+06                  | 1.16091e+06                  |
| 10                   | 2.35711e+06                  | 1.94750e+06                  |
| 20                   | 4.04057e+06                  | 3.47802e+06                  |
| 40                   | 6.68282e+06                  | 7.35191e+06                  |

Table 32: Internal standard for the experiment 100628b\_page100727\_wt\_il1\_0u01u02u05u1\_pmk2\_pp38



**Figure 20:** 100628b\_page100727\_wt\_il1\_0u01u02u05u1\_pmk2\_pp38 observables and experimental data for the experiment. The observables are displayed as solid lines. The error model that describes the measurement noise is indicated by shades.

Unit: conc. [a.u.]; With error model:

$$\sigma\{p\_mk2\_au\}(t) = sd\_pMK2\_au \quad (167)$$

• **Observable:** p\_p38\_au

$$p\_p38\_au(t) = offset\_gel\_pp38\_100628b\_100727 + [pp38] \cdot scale\_pp38\_100628b\_100727 \quad (168)$$

Unit: conc. [a.u.]; With error model:

$$\sigma\{p\_p38\_au\}(t) = sd\_pp38\_au \quad (169)$$

• **Observable:** int\_p\_mk2\_au

$$int\_p\_mk2\_au(intstd) = offset\_gel\_pMK2\_100628b\_100727 + \frac{scale\_pMK2 \cdot scale\_pMK2\_100628b\_100727 \cdot intstd}{V} \quad (170)$$

Unit: conc. [a.u.]; With error model:

$$\sigma\{int\_p\_mk2\_au\}(intstd) = sd\_pMK2\_au \quad (171)$$

• **Observable:** int\_p\_p38\_au

$$int\_p\_p38\_au(intstd) = offset\_gel\_pp38\_100628b\_100727 + \frac{scale\_pp38 \cdot scale\_pp38\_100628b\_100727 \cdot intstd}{V} \quad (172)$$

Unit: conc. [a.u.]; With error model:

$$\sigma\{int\_p\_p38\_au\}(intstd) = sd\_pp38\_au \quad (173)$$

**Conditions** To evaluate the ODE system of Equation 23 – 27 for the conditions in this experiment, the following parameter transformations are applied:

$$input\_il1b \rightarrow 0.1 \mid 0.2 \mid 0.5 \mid 1$$

$$scale\_pMK2\_100628b\_100727 \rightarrow \frac{scale\_pMK2\_100628b\_100727}{init\_MK2}$$

$$scale\_pp38\_100628b\_100727 \rightarrow \frac{scale\_pp38\_100628b\_100727}{init\_p38}$$

| time<br>[min] | input_il1b<br>[ng · ml <sup>-1</sup> ] | p_p38_au<br>conc. [a.u.] | p_mk2_au<br>conc. [a.u.] |
|---------------|----------------------------------------|--------------------------|--------------------------|
| 5             | 0.1                                    | 722952                   | 1.03004e+06              |
| 5             | 0.2                                    | 615439                   | 1.20730e+06              |
| 5             | 0.5                                    | 761457                   | 1.08321e+06              |
| 5             | 1                                      | 610840                   | 1.20782e+06              |
| 10            | 0.1                                    | 619458                   | 1.01476e+06              |
| 10            | 0.2                                    | 833647                   | 929497                   |
| 10            | 0.5                                    | 796891                   | 1.34044e+06              |
| 10            | 1                                      | 834316                   | 1.48273e+06              |
| 15            | 0.1                                    | 613677                   | 1.15900e+06              |
| 15            | 0.2                                    | 684809                   | 1.01944e+06              |
| 15            | 0.5                                    | 659067                   | 1.36406e+06              |
| 15            | 1                                      | 863195                   | 1.65046e+06              |
| 20            | 0.1                                    | 687624                   | 863952                   |
| 20            | 0.2                                    | 680610                   | 1.59208e+06              |
| 20            | 0.5                                    | 688219                   | 1.01759e+06              |
| 20            | 1                                      | 1.04158e+06              | 1.67175e+06              |
| 30            | 0.1                                    | 613909                   | 1.20728e+06              |
| 30            | 0.2                                    | 861346                   | 1.21168e+06              |
| 30            | 0.5                                    | 795048                   | 1.05817e+06              |
| 30            | 1                                      | 814250                   | 1.96829e+06              |
| 40            | 0.1                                    | 811689                   | 990572                   |
| 40            | 0.2                                    | 630124                   | 1.16036e+06              |
| 40            | 0.5                                    | 788092                   | 1.42571e+06              |
| 40            | 1                                      | 933532                   | 1.48742e+06              |
| 60            | 0.1                                    | 622588                   | 1.06130e+06              |
| 60            | 0.2                                    | 630252                   | 1.40708e+06              |
| 60            | 0.5                                    | 679701                   | 1.36327e+06              |
| 60            | 1                                      | 749906                   | 1.28721e+06              |
| 0             | 0.1                                    | 700990                   | 942007                   |
| 0             | 0.1                                    | 680600                   | 1.07009e+06              |

Table 33: Experimental data for the experiment 100628b\_page100728a\_wt\_il1\_0u01u02u05u1\_pm2\_pp38

### 2.2.16 Experiment: 100628b\_page100728a\_wt\_il1\_0u01u02u05u1\_pm2\_pp38

**Comments** In this experiment the primary hepatocytes were treated with IL-1 $\beta$  doses from 0.1–1 ng/ml and the internal standard was measured.

**Model fit and plots** The agreement of the model observables and the experimental data, given in Table 33 and 34, yields a value of the objective function  $-2 \log(L) = -132.704$  for 70 data points in this data set. The model observables and the experimental data is show in Figure 21.

**Observables** The following observables are added in this data set:

- **Observable:** p\_mk2\_au

$$p\_mk2\_au(t) = \text{offset\_gel\_pMK2\_100628b\_100728a} + [pMK2] \cdot \text{scale\_pMK2\_100628b\_100728a} \quad (174)$$

| intstd<br>[ $\mu$ L] | int_p_p38_au<br>conc. [a.u.] | int_p_mk2_au<br>conc. [a.u.] |
|----------------------|------------------------------|------------------------------|
| 1                    | 497475                       | 831934                       |
| 5                    | 938067                       | 992907                       |
| 10                   | 1.65583e+06                  | 1.63055e+06                  |
| 20                   | 3.10860e+06                  | 3.20702e+06                  |
| 40                   | 2.92403e+06                  | 3.60867e+06                  |

Table 34: Internal standard for the experiment 100628b\_page100728a\_wt\_il1\_0u01u02u05u1\_pm2\_pp38



**Figure 21:** 100628b\_page100728a\_wt\_il1\_0u01u02u05u1\_pmk2\_pp38 observables and experimental data for the experiment. The observables are displayed as solid lines. The error model that describes the measurement noise is indicated by shades.

Unit: conc. [a.u.]; With error model:

$$\sigma\{p\_mk2\_au\}(t) = sd\_pMK2\_au \quad (175)$$

• **Observable:** p\_p38\_au

$$p\_p38\_au(t) = offset\_gel\_pp38\_100628b\_100728a + [pp38] \cdot scale\_pp38\_100628b\_100728a \quad (176)$$

Unit: conc. [a.u.]; With error model:

$$\sigma\{p\_p38\_au\}(t) = sd\_pp38\_au \quad (177)$$

• **Observable:** int\_p\_mk2\_au

$$int\_p\_mk2\_au(intstd) = offset\_gel\_pMK2\_100628b\_100728a + \frac{scale\_pMK2 \cdot scale\_pMK2\_100628b\_100728a \cdot intstd}{V} \quad (178)$$

Unit: conc. [a.u.]; With error model:

$$\sigma\{int\_p\_mk2\_au\}(intstd) = sd\_pMK2\_au \quad (179)$$

• **Observable:** int\_p\_p38\_au

$$int\_p\_p38\_au(intstd) = offset\_gel\_pp38\_100628b\_100728a + \frac{scale\_pp38 \cdot scale\_pp38\_100628b\_100728a \cdot intstd}{V} \quad (180)$$

Unit: conc. [a.u.]; With error model:

$$\sigma\{int\_p\_p38\_au\}(intstd) = sd\_pp38\_au \quad (181)$$

**Conditions** To evaluate the ODE system of Equation 23 – 27 for the conditions in this experiment, the following parameter transformations are applied:

$$input\_il1b \rightarrow 0.1 \mid 0.2 \mid 0.5 \mid 1$$

$$scale\_pMK2\_100628b\_100727 \rightarrow \frac{scale\_pMK2\_100628b\_100727}{init\_MK2}$$

$$scale\_pp38\_100628b\_100728a \rightarrow \frac{scale\_pp38\_100628b\_100728a}{init\_p38}$$

| time<br>[min] | input_il1b<br>[ng · ml <sup>-1</sup> ] | p_p38_au<br>conc. [a.u.] | p_mk2_au<br>conc. [a.u.] |
|---------------|----------------------------------------|--------------------------|--------------------------|
| 5             | 0.1                                    | 686212                   | 1.07256e+06              |
| 5             | 0.2                                    | 724354                   | 927487                   |
| 5             | 0.5                                    | 647093                   | 913891                   |
| 5             | 1                                      | 735123                   | 1.10162e+06              |
| 10            | 0.1                                    | 578242                   | 1.02273e+06              |
| 10            | 0.2                                    | 585371                   | 1.00378e+06              |
| 10            | 0.5                                    | 758707                   | 1.52011e+06              |
| 10            | 1                                      | 944310                   | 1.82361e+06              |
| 15            | 0.1                                    | 635523                   | 950488                   |
| 15            | 0.2                                    | 660105                   | 1.30188e+06              |
| 15            | 0.5                                    | 665869                   | 1.49120e+06              |
| 15            | 1                                      | 938847                   | 1.58311e+06              |
| 20            | 0.1                                    | 733571                   | 769158                   |
| 20            | 0.2                                    | 653741                   | 1.15237e+06              |
| 20            | 0.5                                    | 697333                   | 1.62825e+06              |
| 20            | 1                                      | 908029                   | 1.51383e+06              |
| 30            | 0.1                                    | 654582                   | 1.04047e+06              |
| 30            | 0.2                                    | 532231                   | 1.07726e+06              |
| 30            | 0.5                                    | 837961                   | 1.14097e+06              |
| 30            | 1                                      | 878256                   | 1.56617e+06              |
| 40            | 0.1                                    | 644657                   | 827687                   |
| 40            | 0.2                                    | 696826                   | 1.29390e+06              |
| 40            | 0.5                                    | 846472                   | 1.52030e+06              |
| 40            | 1                                      | 794731                   | 1.51025e+06              |
| 60            | 0.1                                    | 700220                   | 1.07511e+06              |
| 60            | 0.2                                    | 837888                   | 1.35190e+06              |
| 60            | 0.5                                    | 679119                   | 1.45311e+06              |
| 60            | 1                                      | 680833                   | 1.34025e+06              |
| 0             | 0.1                                    | 752977                   | 965299                   |
| 0             | 0.1                                    | 619005                   | 826662                   |

Table 35: Experimental data for the experiment 100628b\_page100728b\_wt\_il1\_0u01u02u05u1\_pm2\_pp38

### 2.2.17 Experiment: 100628b\_page100728b\_wt\_il1\_0u01u02u05u1\_pm2\_pp38

**Comments** In this experiment the primary hepatocytes were treated with IL-1 $\beta$  doses from 0.1–1 ng/ml and the internal standard was measured.

**Model fit and plots** The agreement of the model observables and the experimental data, given in Table 35 and 36, yields a value of the objective function  $-2 \log(L) = -136.472$  for 70 data points in this data set. The model observables and the experimental data is show in Figure 22.

**Observables** The following observables are added in this data set:

- **Observable:** p\_mk2\_au

$$p\_mk2\_au(t) = \text{offset\_gel\_pMK2\_100628b\_100728b} + [pMK2] \cdot \text{scale\_pMK2\_100628b\_100728b} \quad (182)$$

| intstd<br>[ $\mu$ L] | int_p_p38_au<br>conc. [a.u.] | int_p_mk2_au<br>conc. [a.u.] |
|----------------------|------------------------------|------------------------------|
| 1                    | 755987                       | 798249                       |
| 5                    | 1.05470e+06                  | 932393                       |
| 10                   | 1.39170e+06                  | 1.25241e+06                  |
| 20                   | 2.34829e+06                  | 2.75439e+06                  |
| 40                   | 3.73817e+06                  | 5.30541e+06                  |

Table 36: Internal standard for the experiment 100628b\_page100728b\_wt\_il1\_0u01u02u05u1\_pm2\_pp38



Figure 22: 100628b\_page100728b\_wt\_il1\_0u01u02u05u1\_pmk2\_pp38 observables and experimental data for the experiment. The observables are displayed as solid lines. The error model that describes the measurement noise is indicated by shades.

Unit: conc. [a.u.]; With error model:

$$\sigma\{p\_mk2\_au\}(t) = sd\_pMK2\_au \quad (183)$$

• **Observable:** p\_p38\_au

$$p\_p38\_au(t) = offset\_gel\_pp38\_100628b\_100728b + [pp38] \cdot scale\_pp38\_100628b\_100728b \quad (184)$$

Unit: conc. [a.u.]; With error model:

$$\sigma\{p\_p38\_au\}(t) = sd\_pp38\_au \quad (185)$$

• **Observable:** int\_p\_mk2\_au

$$int\_p\_mk2\_au(intstd) = offset\_gel\_pMK2\_100628b\_100728b + \frac{scale\_pMK2 \cdot scale\_pMK2\_100628b\_100728b \cdot intstd}{V} \quad (186)$$

Unit: conc. [a.u.]; With error model:

$$\sigma\{int\_p\_mk2\_au\}(intstd) = sd\_pMK2\_au \quad (187)$$

• **Observable:** int\_p\_p38\_au

$$int\_p\_p38\_au(intstd) = offset\_gel\_pp38\_100628b\_100728b + \frac{scale\_pp38 \cdot scale\_pp38\_100628b\_100728b \cdot intstd}{V} \quad (188)$$

Unit: conc. [a.u.]; With error model:

$$\sigma\{int\_p\_p38\_au\}(intstd) = sd\_pp38\_au \quad (189)$$

**Conditions** To evaluate the ODE system of Equation 23 – 27 for the conditions in this experiment, the following parameter transformations are applied:

$$input\_il1b \rightarrow 0.1 \mid 0.2 \mid 0.5 \mid 1$$

$$scale\_pMK2\_100628b\_100728b \rightarrow \frac{scale\_pMK2\_100628b\_100728b}{init\_MK2}$$

$$scale\_pp38\_100628b\_100728b \rightarrow \frac{scale\_pp38\_100628b\_100728b}{init\_p38}$$



**Figure 23:** 100708\_page100715\_mk2ko\_il1\_0u01u02u05u1\_pp38 observables and experimental data for the experiment. The observables are displayed as solid lines. The error model that describes the measurement noise is indicated by shades.

### 2.2.18 Experiment: 100708\_page100715\_mk2ko\_il1\_0u01u02u05u1\_pp38

**Comments** In this experiment the primary hepatocytes from MK2 knockout mice were treated with IL-1 $\beta$  doses from 0.1–1 ng/ml and the internal standard was measured.

**Model fit and plots** The agreement of the model observables and the experimental data, given in Table 37 and 38, yields a value of the objective function  $-2 \log(L) = -18.3896$  for 39 data points in this data set. The model observables and the experimental data is show in Figure 23.

**Observables** The following observables are added in this data set:

- **Observable:** p\_p38\_au

$$p\_p38\_au(t) = \text{offset\_gel\_pp38\_100708\_100715} + [pp38] \cdot \text{scale\_pp38\_100708\_100715} \quad (190)$$

Unit: conc. [a.u.]; With error model:

$$\sigma\{p\_p38\_au\}(t) = \text{sd\_pp38\_mk2ko\_au} \quad (191)$$

| time<br>[min] | input_il1b<br>[ng · ml <sup>-1</sup> ] | p_p38_au<br>conc. [a.u.] |
|---------------|----------------------------------------|--------------------------|
| 0             | 0.1                                    | 471660                   |
| 0             | 0.1                                    | 542351                   |
| 5             | 0.1                                    | 543452                   |
| 5             | 0.2                                    | 672041                   |
| 5             | 0.5                                    | 689239                   |
| 5             | 1                                      | 758785                   |
| 10            | 0.1                                    | 519485                   |
| 10            | 0.2                                    | 543243                   |
| 10            | 0.5                                    | 515491                   |
| 10            | 1                                      | 893561                   |
| 15            | 0.1                                    | 736482                   |
| 15            | 0.2                                    | 1.01229e+06              |
| 15            | 0.5                                    | 999797                   |
| 15            | 1                                      | 912484                   |
| 20            | 0.1                                    | 946794                   |
| 20            | 0.2                                    | 655664                   |
| 20            | 0.5                                    | 1.09972e+06              |
| 20            | 1                                      | 1.02823e+06              |
| 30            | 0.1                                    | 726980                   |
| 30            | 0.2                                    | 283747                   |
| 30            | 0.5                                    | 793640                   |
| 30            | 1                                      | 843829                   |
| 40            | 0.1                                    | 545233                   |
| 40            | 0.2                                    | 294180                   |
| 40            | 0.5                                    | 796746                   |
| 40            | 1                                      | 786521                   |
| 50            | 0.1                                    | 770414                   |
| 50            | 0.2                                    | 824163                   |
| 50            | 0.5                                    | 748981                   |
| 50            | 1                                      | 799512                   |
| 60            | 0.1                                    | 559958                   |
| 60            | 0.2                                    | 235539                   |
| 60            | 0.5                                    | 671028                   |
| 60            | 1                                      | 655039                   |

Table 37: Experimental data for the experiment 100708\_page100715\_mk2ko\_il1\_0u01u02u05u1\_pp38

| intstd<br>[ $\mu$ L] | int_p_p38_au<br>conc. [a.u.] |
|----------------------|------------------------------|
| 1                    | 163348                       |
| 5                    | 290048                       |
| 10                   | 316838                       |
| 20                   | 641530                       |
| 40                   | 1.13665e+06                  |

Table 38: Internal standard for the experiment 100708\_page100715\_mk2ko\_il1\_0u01u02u05u1\_pp38

- **Observable:** `int_p_p38_au`

$$\text{int\_p\_p38\_au}(\text{intstd}) = \text{offset\_gel\_pp38\_100708\_100715} + \frac{\text{scale\_pp38} \cdot \text{scale\_pp38\_100708\_100715} \cdot \text{intstd}}{V} \quad (192)$$

Unit: conc. [a.u.]; With error model:

$$\sigma\{\text{int\_p\_p38\_au}\}(\text{intstd}) = \text{sd\_pp38\_mk2ko\_au} \quad (193)$$

**Conditions** To evaluate the ODE system of Equation 23 – 27 for the conditions in this experiment, the following parameter transformations are applied:

$$\begin{array}{lcl} \text{init\_pMK2} & \rightarrow & 0 \mid 0 \mid 0 \mid 0 \\ \text{input\_il1b} & \rightarrow & 0.1 \mid 0.2 \mid 0.5 \mid 1 \\ \text{mk2\_ko} & \rightarrow & 1 \mid 1 \mid 1 \mid 1 \\ \text{scale\_pp38\_100708\_100715} & \rightarrow & \frac{\text{scale\_pp38\_100708\_100715}}{\text{init\_p38}} \end{array}$$

| time<br>[min] | input_il1b<br>[ng · ml <sup>-1</sup> ] | p_p38_au<br>conc. [a.u.] | p_mk2_au<br>conc. [a.u.] |
|---------------|----------------------------------------|--------------------------|--------------------------|
| 5             | 0.1                                    | 97135                    | 1915                     |
| 5             | 0.2                                    | 82234                    | 1970                     |
| 5             | 0.5                                    | 146671                   | 539                      |
| 5             | 1                                      | 161571                   | 1283                     |
| 10            | 0.1                                    | 83978                    | 1778                     |
| 10            | 0.2                                    | 52779                    | 352                      |
| 10            | 0.5                                    | 48381                    | 917                      |
| 10            | 1                                      | 46537                    | 589                      |
| 15            | 0.1                                    | 141415                   | 1272                     |
| 15            | 0.2                                    | 342034                   | 904                      |
| 15            | 0.5                                    | 526824                   | 1906                     |
| 15            | 1                                      | 427968                   | 599                      |
| 20            | 0.1                                    | 260521                   | 1456                     |
| 20            | 0.2                                    | 312900                   | 695                      |
| 20            | 0.5                                    | 480261                   | 1242                     |
| 20            | 1                                      | 570023                   | 668                      |
| 30            | 0.1                                    | 97293                    | 1639                     |
| 30            | 0.2                                    | 171201                   | 1111                     |
| 30            | 0.5                                    | 400935                   | 1269                     |
| 30            | 1                                      | 267549                   | 1354                     |
| 40            | 0.1                                    | 110081                   | 1403                     |
| 40            | 0.2                                    | 162383                   | 976                      |
| 40            | 0.5                                    | 297922                   | 1430                     |
| 40            | 1                                      | 234021                   | 1646                     |
| 60            | 0.1                                    | 145303                   | 449                      |
| 60            | 0.2                                    | 256956                   | 1354                     |
| 60            | 0.5                                    | 186469                   | 699                      |
| 60            | 1                                      | 247898                   | 560                      |
| 0             | 0.1                                    | 52436.8                  | 1244                     |

Table 39: Experimental data for the experiment 110317a\_page110406a\_mk2ko\_il1\_0u01u02u05u1\_pmk2\_pp38

### 2.2.19 Experiment: 110317a\_page110406a\_mk2ko\_il1\_0u01u02u05u1\_pmk2\_pp38

**Comments** In this experiment the primary hepatocytes from MK2 knockout mice were treated with IL-1 $\beta$  doses from 0.1–1 ng/ml and the internal standard was measured.

**Model fit and plots** The agreement of the model observables and the experimental data, given in Table 39 and 40, yields a value of the objective function  $-2 \log(L) = 30.5296$  for 68 data points in this data set. The model observables and the experimental data is show in Figure 24.

**Observables** The following observables are added in this data set:

- **Observable:** p\_mk2\_au

$$p\_mk2\_au(t) = \text{offset\_gel\_pMK2\_110317a\_110406a} + [pMK2] \cdot \text{scale\_pMK2\_110317a\_110406a} \quad (194)$$

Unit: conc. [a.u.]; With error model:

$$\sigma\{p\_mk2\_au\}(t) = \text{sd\_pMK2\_mk2ko\_au} \quad (195)$$

- **Observable:** p\_p38\_au

$$p\_p38\_au(t) = \text{offset\_gel\_pp38\_110317a\_110406a} + [pp38] \cdot \text{scale\_pp38\_110317a\_110406a} \quad (196)$$

Unit: conc. [a.u.]; With error model:

$$\sigma\{p\_p38\_au\}(t) = \text{sd\_pp38\_mk2ko\_au} \quad (197)$$



Figure 24: 110317a\_page110406a\_mk2ko\_il1\_0u01u02u05u1\_pmk2\_pp38 observables and experimental data for the experiment. The observables are displayed as solid lines. The error model that describes the measurement noise is indicated by shades.

| intstd     | int_p-p38_au | int_p-mk2_au |
|------------|--------------|--------------|
| [ $\mu$ L] | conc. [a.u.] | conc. [a.u.] |
| 1          | 19189        | 2749         |
| 5          | 158482       | 158846       |
| 10         | 686623       | 125961       |
| 20         | 1.24233e+06  | 881268       |
| 40         | 3.35953e+06  | 1.82000e+06  |

Table 40: Internal standard for the experiment 110317a\_page110406a\_mk2ko\_il1\_0u01u02u05u1\_pmk2\_pp38

- **Observable:** `int_p_mk2_au`

$$\text{int\_p\_mk2\_au}(\text{intstd}) = \text{offset\_gel\_pMK2\_110317a\_110406a} + \frac{\text{scale\_pMK2} \cdot \text{scale\_pMK2\_110317a\_110406a} \cdot \text{intstd}}{V} \quad (198)$$

Unit: conc. [a.u.]; With error model:

$$\sigma\{\text{int\_p\_mk2\_au}\}(\text{intstd}) = \text{sd\_pMK2\_mk2ko\_au} \quad (199)$$

- **Observable:** `int_p_p38_au`

$$\text{int\_p\_p38\_au}(\text{intstd}) = \text{offset\_gel\_pp38\_110317a\_110406a} + \frac{\text{scale\_pp38} \cdot \text{scale\_pp38\_110317a\_110406a} \cdot \text{intstd}}{V} \quad (200)$$

Unit: conc. [a.u.]; With error model:

$$\sigma\{\text{int\_p\_p38\_au}\}(\text{intstd}) = \text{sd\_pp38\_mk2ko\_au} \quad (201)$$

**Conditions** To evaluate the ODE system of Equation 23 – 27 for the conditions in this experiment, the following parameter transformations are applied:

$$\begin{array}{lcl} \text{init\_pMK2} & \rightarrow & 0 \mid 0 \mid 0 \mid 0 \\ \text{input\_il1b} & \rightarrow & 0.1 \mid 0.2 \mid 0.5 \mid 1 \\ \text{mk2\_ko} & \rightarrow & 1 \mid 1 \mid 1 \mid 1 \end{array}$$

$$\begin{array}{lcl} \text{scale\_pMK2\_110317a\_110406a} & \rightarrow & \frac{\text{scale\_pMK2\_110317a\_110406a}}{\text{init\_MK2}} \\ \text{scale\_pp38\_110317a\_110406a} & \rightarrow & \frac{\text{scale\_pp38\_110317a\_110406a}}{\text{init\_p38}} \end{array}$$

| time<br>[min] | input_il1b<br>[ng · ml <sup>-1</sup> ] | p_p38_au<br>conc. [a.u.] | p_mk2_au<br>conc. [a.u.] |
|---------------|----------------------------------------|--------------------------|--------------------------|
| 5             | 0.1                                    | 197334                   | 1862                     |
| 5             | 0.2                                    | 187852                   | 1933                     |
| 5             | 0.5                                    | 192547                   | 1048                     |
| 5             | 1                                      | 313470                   | 1829                     |
| 10            | 0.1                                    | 256709                   | 1576                     |
| 10            | 0.2                                    | 471102                   | 644                      |
| 10            | 0.5                                    | 620356                   | 1175                     |
| 10            | 1                                      | 986698                   | 1661                     |
| 15            | 0.1                                    | 530063                   | 1260                     |
| 15            | 0.2                                    | 590219                   | 841                      |
| 15            | 0.5                                    | 893335                   | 760                      |
| 15            | 1                                      | 1.12626e+06              | 740                      |
| 20            | 0.1                                    | 390573                   | 1404                     |
| 20            | 0.2                                    | 672365                   | 1028                     |
| 20            | 0.5                                    | 1.19592e+06              | 773                      |
| 20            | 1                                      | 1.31411e+06              | 1682                     |
| 30            | 0.1                                    | 254872                   | 1455                     |
| 30            | 0.2                                    | 568442                   | 1125                     |
| 30            | 0.5                                    | 508149                   | 935                      |
| 30            | 1                                      | 673881                   | 1653                     |
| 40            | 0.1                                    | 178479                   | 1791                     |
| 40            | 0.2                                    | 485888                   | 1370                     |
| 40            | 0.5                                    | 560572                   | 1376                     |
| 40            | 1                                      | 494034                   | 900                      |
| 60            | 0.1                                    | 373746                   | 2271                     |
| 60            | 0.2                                    | 516312                   | 1393                     |
| 60            | 0.5                                    | 430163                   | 556                      |
| 60            | 1                                      | 358029                   | 1619                     |
| 0             | 0.1                                    | 74994                    | 1864                     |
| 0             | 0.1                                    | 107340                   | 828                      |
| 0             | 0.1                                    | 78317                    | 1798                     |
| 0             | 0.1                                    | 98164                    | 1339                     |

Table 41: Experimental data for the experiment 110317b\_page110405a\_mk2ko\_il1\_0u01u02u05u1\_pm2\_pp38

### 2.2.20 Experiment: 110317b\_page110405a\_mk2ko\_il1\_0u01u02u05u1\_pm2\_pp38

**Comments** In this experiment the primary hepatocytes from MK2 knockout mice were treated with IL-1 $\beta$  doses from 0.1–1 ng/ml and the internal standard was measured.

**Model fit and plots** The agreement of the model observables and the experimental data, given in Table 41 and 42, yields a value of the objective function  $-2 \log(L) = -36.4771$  for 74 data points in this data set. The model observables and the experimental data is show in Figure 25.

**Observables** The following observables are added in this data set:

- **Observable:** p\_mk2\_au

$$p\_mk2\_au(t) = \text{offset\_gel\_pMK2\_110317b\_110405a} + [pMK2] \cdot \text{scale\_pMK2\_110317b\_110405a} \quad (202)$$

Unit: conc. [a.u.]; With error model:

$$\sigma\{p\_mk2\_au\}(t) = \text{sd\_pMK2\_mk2ko\_au} \quad (203)$$

- **Observable:** p\_p38\_au

$$p\_p38\_au(t) = \text{offset\_gel\_pp38\_110317b\_110405a} + [pp38] \cdot \text{scale\_pp38\_110317b\_110405a} \quad (204)$$

Unit: conc. [a.u.]; With error model:

$$\sigma\{p\_p38\_au\}(t) = \text{sd\_pp38\_mk2ko\_au} \quad (205)$$



Figure 25: 110317b\_page110405a\_mk2ko\_il1\_0u01u02u05u1\_pmk2\_pp38 observables and experimental data for the experiment. The observables are displayed as solid lines. The error model that describes the measurement noise is indicated by shades.

| intstd            | int_p-p38_au | int_p-mk2_au |
|-------------------|--------------|--------------|
| [ $\mu\text{L}$ ] | conc. [a.u.] | conc. [a.u.] |
| 1                 | 87314        | 12350        |
| 5                 | 516245       | 106423       |
| 10                | 1.43372e+06  | 339135       |
| 20                | 3.02486e+06  | 1.12443e+06  |
| 40                | 4.19630e+06  | 1.54314e+06  |

Table 42: Internal standard for the experiment 110317b\_page110405a\_mk2ko\_il1\_0u01u02u05u1\_pmk2\_pp38

- **Observable:** `int_p_mk2_au`

$$\text{int\_p\_mk2\_au}(\text{intstd}) = \text{offset\_gel\_pMK2\_110317b\_110405a} + \frac{\text{scale\_pMK2} \cdot \text{scale\_pMK2\_110317b\_110405a} \cdot \text{intstd}}{V} \quad (206)$$

Unit: conc. [a.u.]; With error model:

$$\sigma\{\text{int\_p\_mk2\_au}\}(\text{intstd}) = \text{sd\_pMK2\_mk2ko\_au} \quad (207)$$

- **Observable:** `int_p_p38_au`

$$\text{int\_p\_p38\_au}(\text{intstd}) = \text{offset\_gel\_pp38\_110317b\_110405a} + \frac{\text{scale\_pp38} \cdot \text{scale\_pp38\_110317b\_110405a} \cdot \text{intstd}}{V} \quad (208)$$

Unit: conc. [a.u.]; With error model:

$$\sigma\{\text{int\_p\_p38\_au}\}(\text{intstd}) = \text{sd\_pp38\_mk2ko\_au} \quad (209)$$

**Conditions** To evaluate the ODE system of Equation 23 – 27 for the conditions in this experiment, the following parameter transformations are applied:

$$\begin{array}{lcl} \text{init\_pMK2} & \rightarrow & 0 \mid 0 \mid 0 \mid 0 \\ \text{input\_il1b} & \rightarrow & 0.1 \mid 0.2 \mid 0.5 \mid 1 \\ \text{mk2\_ko} & \rightarrow & 1 \mid 1 \mid 1 \mid 1 \end{array}$$

$$\begin{array}{lcl} \text{scale\_pMK2\_110317b\_110405a} & \rightarrow & \frac{\text{scale\_pMK2\_110317b\_110405a}}{\text{init\_MK2}} \\ \text{scale\_pp38\_110317b\_110405a} & \rightarrow & \frac{\text{scale\_pp38\_110317b\_110405a}}{\text{init\_p38}} \end{array}$$

| time<br>[min] | input_il1b<br>[ng · ml <sup>-1</sup> ] | p_p38_au<br>conc. [a.u.] | p_mk2_au<br>conc. [a.u.] |
|---------------|----------------------------------------|--------------------------|--------------------------|
| 5             | 0.1                                    | 148327                   | 1832                     |
| 5             | 0.2                                    | 187653                   | 74                       |
| 5             | 0.5                                    | 226551                   | 389                      |
| 5             | 1                                      | 231847                   | 832                      |
| 10            | 0.1                                    | 188980                   | 1934                     |
| 10            | 0.2                                    | 395707                   | 512                      |
| 10            | 0.5                                    | 613017                   | 110                      |
| 10            | 1                                      | 723956                   | 1367                     |
| 15            | 0.1                                    | 398911                   | 331                      |
| 15            | 0.2                                    | 624777                   | 1042                     |
| 15            | 0.5                                    | 875329                   | 942                      |
| 15            | 1                                      | 986283                   | 346                      |
| 20            | 0.1                                    | 332037                   | 912                      |
| 20            | 0.2                                    | 511633                   | 921                      |
| 20            | 0.5                                    | 905815                   | 1440                     |
| 20            | 1                                      | 830682                   | 373                      |
| 30            | 0.1                                    | 190136                   | 1244                     |
| 30            | 0.2                                    | 440311                   | 1777                     |
| 30            | 0.5                                    | 524312                   | 456                      |
| 30            | 1                                      | 547606                   | 53                       |
| 40            | 0.1                                    | 254455                   | 1289                     |
| 40            | 0.2                                    | 409144                   | 1246                     |
| 40            | 0.5                                    | 441799                   | 1576                     |
| 40            | 1                                      | 381959                   | 565                      |
| 60            | 0.1                                    | 229065                   | 1261                     |
| 60            | 0.2                                    | 415263                   | 1086                     |
| 60            | 0.5                                    | 338963                   | 515                      |
| 60            | 1                                      | 427740                   | 1472                     |
| 0             | 0.1                                    | 112547                   | 544                      |
| 0             | 0.1                                    | 86139                    | 1381                     |
| 0             | 0.1                                    | 84687                    | 1149                     |
| 0             | 0.1                                    | 88053                    | 666                      |

Table 43: Experimental data for the experiment 110317b\_page110405b\_mk2ko\_il1\_0u01u02u05u1\_pm2\_pp38

### 2.2.21 Experiment: 110317b\_page110405b\_mk2ko\_il1\_0u01u02u05u1\_pm2\_pp38

**Comments** In this experiment the primary hepatocytes from MK2 knockout mice were treated with IL-1 $\beta$  doses from 0.1–1 ng/ml and the internal standard was measured.

**Model fit and plots** The agreement of the model observables and the experimental data, given in Table 43 and 44, yields a value of the objective function  $-2\log(L) = 24.7832$  for 74 data points in this data set. The model observables and the experimental data is show in Figure 26.

**Observables** The following observables are added in this data set:

- **Observable:** p\_mk2\_au

$$p\_mk2\_au(t) = \text{offset\_gel\_pMK2\_110317b\_110405b} + [pMK2] \cdot \text{scale\_pMK2\_110317b\_110405b} \quad (210)$$

Unit: conc. [a.u.]; With error model:

$$\sigma\{p\_mk2\_au\}(t) = \text{sd\_pMK2\_mk2ko\_au} \quad (211)$$

- **Observable:** p\_p38\_au

$$p\_p38\_au(t) = \text{offset\_gel\_pp38\_110317b\_110405b} + [pp38] \cdot \text{scale\_pp38\_110317b\_110405b} \quad (212)$$

Unit: conc. [a.u.]; With error model:

$$\sigma\{p\_p38\_au\}(t) = \text{sd\_pp38\_mk2ko\_au} \quad (213)$$



Figure 26: 110317b\_page110405b\_mk2ko\_il1\_0u01u02u05u1\_pmk2\_pp38 observables and experimental data for the experiment. The observables are displayed as solid lines. The error model that describes the measurement noise is indicated by shades.

| intstd     | int_p-p38_au | int_p-mk2_au |
|------------|--------------|--------------|
| [ $\mu$ L] | conc. [a.u.] | conc. [a.u.] |
| 1          | 37792        | 1152         |
| 5          | 658621       | 165154       |
| 10         | 1.07282e+06  | 157547       |
| 20         | 3.12227e+06  | 720680       |
| 40         | 4.47625e+06  | 1.18408e+06  |

Table 44: Internal standard for the experiment 110317b\_page110405b\_mk2ko\_il1\_0u01u02u05u1\_pmk2\_pp38

- **Observable:** `int_p_mk2_au`

$$\text{int\_p\_mk2\_au}(\text{intstd}) = \text{offset\_gel\_pMK2\_110317b\_110405b} + \frac{\text{scale\_pMK2} \cdot \text{scale\_pMK2\_110317b\_110405b} \cdot \text{intstd}}{V} \quad (214)$$

Unit: conc. [a.u.]; With error model:

$$\sigma\{\text{int\_p\_mk2\_au}\}(\text{intstd}) = \text{sd\_pMK2\_mk2ko\_au} \quad (215)$$

- **Observable:** `int_p_p38_au`

$$\text{int\_p\_p38\_au}(\text{intstd}) = \text{offset\_gel\_pp38\_110317b\_110405b} + \frac{\text{scale\_pp38} \cdot \text{scale\_pp38\_110317b\_110405b} \cdot \text{intstd}}{V} \quad (216)$$

Unit: conc. [a.u.]; With error model:

$$\sigma\{\text{int\_p\_p38\_au}\}(\text{intstd}) = \text{sd\_pp38\_mk2ko\_au} \quad (217)$$

**Conditions** To evaluate the ODE system of Equation 23 – 27 for the conditions in this experiment, the following parameter transformations are applied:

$$\begin{array}{lcl} \text{init\_pMK2} & \rightarrow & 0 \mid 0 \mid 0 \mid 0 \\ \text{input\_il1b} & \rightarrow & 0.1 \mid 0.2 \mid 0.5 \mid 1 \\ \text{mk2\_ko} & \rightarrow & 1 \mid 1 \mid 1 \mid 1 \end{array}$$

$$\begin{array}{lcl} \text{scale\_pMK2\_110317b\_110405b} & \rightarrow & \frac{\text{scale\_pMK2\_110317b\_110405b}}{\text{init\_MK2}} \\ \text{scale\_pp38\_110317b\_110405b} & \rightarrow & \frac{\text{scale\_pp38\_110317b\_110405b}}{\text{init\_p38}} \end{array}$$



Figure 27: total\_mk2\_p38\_100421\_page111026a\_wt\_il1\_10\_mk2\_p38 observables and experimental data for the experiment. The observables are displayed as solid lines. The error model that describes the measurement noise is indicated by shades.

### 2.2.22 Experiment: total\_mk2\_p38\_100421\_page111026a\_wt\_il1\_10\_mk2\_p38

**Comments** In this experiment total amount of p38 and MK2 was measured. The primary hepatocytes were treated with IL-1 $\beta$  doses from 0–10 ng/ml and the internal standard was measured.

**Model fit and plots** The agreement of the model observables and the experimental data, given in Table 45 and 46, yields a value of the objective function  $-2 \log(L) = -50.7301$  for 20 data points in this data set. The model observables and the experimental data is show in Figure 27.

**Observables** The following observables are added in this data set:

- **Observable:** mk2ges\_au

$$\text{mk2ges\_au}(t) = \text{offset\_MK2ges\_100421\_111026a} + \text{scale\_MK2ges\_100421\_111026a} \cdot ([\text{MK2}] + [\text{pMK2}]) \quad (218)$$

Unit: conc. [a.u.]; With error model:

$$\sigma\{\text{mk2ges\_au}\}(t) = \text{sd\_MK2ges\_au} \quad (219)$$

| time<br>[min] | input_il1b<br>[ng · ml <sup>-1</sup> ] | p_p38_au<br>conc. [a.u.] | p_mk2_au<br>conc. [a.u.] |
|---------------|----------------------------------------|--------------------------|--------------------------|
| 0             | 0                                      | 2.82171e+06              | 2.26655e+06              |
| 0             | 0                                      | 2.96895e+06              | 2.33498e+06              |
| 20            | 10                                     | 2.59523e+06              | 2.18127e+06              |
| 40            | 10                                     | 3.06990e+06              | 2.11051e+06              |
| 60            | 10                                     | 2.82180e+06              | 2.24559e+06              |

**Table 45: Experimental data for the experiment total\_mk2\_p38\_100421\_page111026a\_wt\_il1\_10\_mk2\_p38**

| intstd<br>[μL] | int_p_p38_au<br>conc. [a.u.] | int_p_mk2_au<br>conc. [a.u.] |
|----------------|------------------------------|------------------------------|
| 1              | 1.22937e+06                  | 1.12596e+06                  |
| 5              | 1.74551e+06                  | 1.55161e+06                  |
| 10             | 2.44295e+06                  | 2.11495e+06                  |
| 20             | 4.45987e+06                  | 4.09525e+06                  |
| 40             | 5.96806e+06                  | 4.78014e+06                  |

**Table 46: Internal standard for the experiment total\_mk2\_p38\_100421\_page111026a\_wt\_il1\_10\_mk2\_p38**

- **Observable:** p38ges\_au

$$p38ges\_au(t) = \text{offset\_p38ges\_100421\_111026a} + \text{scale\_p38ges\_100421\_111026a} \cdot ([p38] + [pp38]) \quad (220)$$

Unit: conc. [a.u.]; With error model:

$$\sigma\{p38ges\_au\}(t) = \text{sd\_p38ges\_au} \quad (221)$$

- **Observable:** int\_mk2ges\_au

$$\text{int\_mk2ges\_au}(\text{intstd}) = \text{offset\_MK2ges\_100421\_111026a} + \frac{\text{scale\_MK2\_total} \cdot \text{scale\_MK2ges\_100421\_111026a} \cdot \text{intstd}}{V} \quad (222)$$

Unit: conc. [a.u.]; With error model:

$$\sigma\{\text{int\_mk2ges\_au}\}(\text{intstd}) = \text{sd\_MK2ges\_au} \quad (223)$$

- **Observable:** int\_p38ges\_au

$$\text{int\_p38ges\_au}(\text{intstd}) = \text{offset\_p38ges\_100421\_111026a} + \frac{\text{scale\_p38\_total} \cdot \text{scale\_p38ges\_100421\_111026a} \cdot \text{intstd}}{V} \quad (224)$$

Unit: conc. [a.u.]; With error model:

$$\sigma\{\text{int\_p38ges\_au}\}(\text{intstd}) = \text{sd\_p38ges\_au} \quad (225)$$

**Conditions** To evaluate the ODE system of Equation 23 – 27 for the conditions in this experiment, the following parameter transformations are applied:

$$\text{input\_il1b} \rightarrow 0 \mid 10$$

$$\text{scale\_MK2ges\_100421\_111026a} \rightarrow \frac{\text{scale\_MK2ges\_100421\_111026a}}{\text{init\_MK2}}$$

$$\text{scale\_p38ges\_100421\_111026a} \rightarrow \frac{\text{scale\_p38ges\_100421\_111026a}}{\text{init\_p38}}$$



**Figure 28:** total\_mk2\_p38\_100504\_page111027a\_wt\_il1\_5\_mk2\_p38 observables and experimental data for the experiment. The observables are displayed as solid lines. The error model that describes the measurement noise is indicated by shades.

### 2.2.23 Experiment: total\_mk2\_p38\_100504\_page111027a\_wt\_il1\_5\_mk2\_p38

**Comments** In this experiment total amount of p38 and MK2 was measured. The primary hepatocytes were treated with IL-1 $\beta$  doses from 0-5 ng/ml and the internal standard was measured.

**Model fit and plots** The agreement of the model observables and the experimental data, given in Table 47 and 48, yields a value of the objective function  $-2 \log(L) = -72.1133$  for 19 data points in this data set. The model observables and the experimental data is show in Figure 28.

**Observables** The following observables are added in this data set:

- **Observable:** mk2ges\_au

$$\text{mk2ges\_au}(t) = \text{offset\_MK2ges\_100504\_111027a} + \text{scale\_MK2ges\_100504\_111027a} \cdot ([\text{MK2}] + [\text{pMK2}]) \quad (226)$$

Unit: conc. [a.u.]; With error model:

$$\sigma\{\text{mk2ges\_au}\}(t) = \text{sd\_MK2ges\_au} \quad (227)$$

| time<br>[min] | input_il1b<br>[ng · ml <sup>-1</sup> ] | p_p38_au<br>conc. [a.u.] | p_mk2_au<br>conc. [a.u.] |
|---------------|----------------------------------------|--------------------------|--------------------------|
| 0             | 0                                      | 1.13458e+06              | 2.74896e+06              |
| 0             | 0                                      | 1.31037e+06              | 2.66821e+06              |
| 5             | 5                                      | 1.38379e+06              | 2.86749e+06              |
| 20            | 5                                      | 1.45768e+06              | 2.47299e+06              |
| 40            | 5                                      | 1.34023e+06              | 2.43708e+06              |

Table 47: Experimental data for the experiment total\_mk2\_p38\_100504\_page111027a\_wt\_il1\_5\_mk2\_p38

| intstd<br>[μL] | int_p_p38_au<br>conc. [a.u.] | int_p_mk2_au<br>conc. [a.u.] |
|----------------|------------------------------|------------------------------|
| 1              | 933036                       | 1.04596e+06                  |
| 5              | 1.04899e+06                  | 1.52063e+06                  |
| 10             | 1.15622e+06                  | 1.89575e+06                  |
| 20             |                              | 2.50508e+06                  |
| 40             | 1.84423e+06                  | 3.74103e+06                  |

Table 48: Internal standard for the experiment total\_mk2\_p38\_100504\_page111027a\_wt\_il1\_5\_mk2\_p38

- **Observable:** p38ges\_au

$$p38ges\_au(t) = \text{offset\_p38ges\_100504\_111027a} + \text{scale\_p38ges\_100504\_111027a} \cdot ([p38] + [pp38]) \quad (228)$$

Unit: conc. [a.u.]; With error model:

$$\sigma\{p38ges\_au\}(t) = \text{sd\_p38ges\_au} \quad (229)$$

- **Observable:** int\_mk2ges\_au

$$\text{int\_mk2ges\_au}(\text{intstd}) = \text{offset\_MK2ges\_100504\_111027a} + \frac{\text{scale\_MK2\_total} \cdot \text{scale\_MK2ges\_100504\_111027a} \cdot \text{intstd}}{V} \quad (230)$$

Unit: conc. [a.u.]; With error model:

$$\sigma\{\text{int\_mk2ges\_au}\}(\text{intstd}) = \text{sd\_MK2ges\_au} \quad (231)$$

- **Observable:** int\_p38ges\_au

$$\text{int\_p38ges\_au}(\text{intstd}) = \text{offset\_p38ges\_100504\_111027a} + \frac{\text{scale\_p38\_total} \cdot \text{scale\_p38ges\_100504\_111027a} \cdot \text{intstd}}{V} \quad (232)$$

Unit: conc. [a.u.]; With error model:

$$\sigma\{\text{int\_p38ges\_au}\}(\text{intstd}) = \text{sd\_p38ges\_au} \quad (233)$$

**Conditions** To evaluate the ODE system of Equation 23 – 27 for the conditions in this experiment, the following parameter transformations are applied:

$$\begin{aligned} \text{input\_il1b} &\rightarrow 0 \mid 5 \\ \text{scale\_MK2ges\_100504\_111027a} &\rightarrow \frac{\text{scale\_MK2ges\_100504\_111027a}}{\text{init\_MK2}} \\ \text{scale\_p38ges\_100504\_111027a} &\rightarrow \frac{\text{scale\_p38ges\_100504\_111027a}}{\text{init\_p38}} \end{aligned}$$



**Figure 29: total\_mk2\_p38\_100504\_page111027b\_wt\_il1\_5\_mk2\_p38 observables and experimental data for the experiment.** The observables are displayed as solid lines. The error model that describes the measurement noise is indicated by shades.

### 2.2.24 Experiment: total\_mk2\_p38\_100504\_page111027b\_wt\_il1\_5\_mk2\_p38

**Comments** In this experiment total amount of p38 and MK2 was measured. The primary hepatocytes were treated with IL-1 $\beta$  doses from 0-5 ng/ml and the internal standard was measured.

**Model fit and plots** The agreement of the model observables and the experimental data, given in Table 49 and 50, yields a value of the objective function  $-2 \log(L) = -73.8161$  for 20 data points in this data set. The model observables and the experimental data is show in Figure 29.

**Observables** The following observables are added in this data set:

- **Observable:** mk2ges\_au

$$\text{mk2ges\_au}(t) = \text{offset\_MK2ges\_100504\_111027b} + \text{scale\_MK2ges\_100504\_111027b} \cdot ([\text{MK2}] + [\text{pMK2}]) \quad (234)$$

Unit: conc. [a.u.]; With error model:

$$\sigma\{\text{mk2ges\_au}\}(t) = \text{sd\_MK2ges\_au} \quad (235)$$

| time<br>[min] | input_il1b<br>[ng · ml <sup>-1</sup> ] | p_p38_au<br>conc. [a.u.] | p_mk2_au<br>conc. [a.u.] |
|---------------|----------------------------------------|--------------------------|--------------------------|
| 0             | 0                                      | 2.50455e+06              | 2.41411e+06              |
| 0             | 0                                      | 2.81358e+06              | 2.07751e+06              |
| 5             | 5                                      | 2.75888e+06              | 2.45709e+06              |
| 20            | 5                                      | 2.43368e+06              | 2.20163e+06              |
| 40            | 5                                      | 2.64688e+06              | 2.21497e+06              |

**Table 49: Experimental data for the experiment total\_mk2\_p38\_100504\_page111027b\_wt\_il1\_5\_mk2\_p38**

| intstd<br>[μL] | int_p_p38_au<br>conc. [a.u.] | int_p_mk2_au<br>conc. [a.u.] |
|----------------|------------------------------|------------------------------|
| 1              | 999898                       | 1.12246e+06                  |
| 5              | 1.31228e+06                  | 1.34348e+06                  |
| 10             | 1.95430e+06                  | 1.69211e+06                  |
| 20             | 2.97289e+06                  | 2.35929e+06                  |
| 40             | 3.81699e+06                  | 3.27855e+06                  |

**Table 50: Internal standard for the experiment total\_mk2\_p38\_100504\_page111027b\_wt\_il1\_5\_mk2\_p38**

- **Observable:** p38ges\_au

$$p38ges\_au(t) = \text{offset\_p38ges\_100504\_111027b} + \text{scale\_p38ges\_100504\_111027b} \cdot ([p38] + [pp38]) \quad (236)$$

Unit: conc. [a.u.]; With error model:

$$\sigma\{p38ges\_au\}(t) = \text{sd\_p38ges\_au} \quad (237)$$

- **Observable:** int\_mk2ges\_au

$$\text{int\_mk2ges\_au}(\text{intstd}) = \text{offset\_MK2ges\_100504\_111027b} + \frac{\text{scale\_MK2\_total} \cdot \text{scale\_MK2ges\_100504\_111027b} \cdot \text{intstd}}{V} \quad (238)$$

Unit: conc. [a.u.]; With error model:

$$\sigma\{\text{int\_mk2ges\_au}\}(\text{intstd}) = \text{sd\_MK2ges\_au} \quad (239)$$

- **Observable:** int\_p38ges\_au

$$\text{int\_p38ges\_au}(\text{intstd}) = \text{offset\_p38ges\_100504\_111027b} + \frac{\text{scale\_p38\_total} \cdot \text{scale\_p38ges\_100504\_111027b} \cdot \text{intstd}}{V} \quad (240)$$

Unit: conc. [a.u.]; With error model:

$$\sigma\{\text{int\_p38ges\_au}\}(\text{intstd}) = \text{sd\_p38ges\_au} \quad (241)$$

**Conditions** To evaluate the ODE system of Equation 23 – 27 for the conditions in this experiment, the following parameter transformations are applied:

$$\begin{aligned} \text{input\_il1b} &\rightarrow 0 \mid 5 \\ \text{scale\_MK2ges\_100504\_111027b} &\rightarrow \frac{\text{scale\_MK2ges\_100504\_111027b}}{\text{init\_MK2}} \\ \text{scale\_p38ges\_100504\_111027b} &\rightarrow \frac{\text{scale\_p38ges\_100504\_111027b}}{\text{init\_p38}} \end{aligned}$$



Figure 30: total\_mk2\_p38\_100628b\_page111027b\_wt\_il1\_1\_mk2\_p38 observables and experimental data for the experiment. The observables are displayed as solid lines. The error model that describes the measurement noise is indicated by shades.

### 2.2.25 Experiment: total\_mk2\_p38\_100628b\_page111027b\_wt\_il1\_1\_mk2\_p38

**Comments** In this experiment total amount of p38 and MK2 was measured. The primary hepatocytes were treated with IL-1 $\beta$  doses from 0–1 ng/ml and the internal standard was measured.

**Model fit and plots** The agreement of the model observables and the experimental data, given in Table 51 and 52, yields a value of the objective function  $-2 \log(L) = -81.7463$  for 20 data points in this data set. The model observables and the experimental data is show in Figure 30.

**Observables** The following observables are added in this data set:

- **Observable:** mk2ges\_au

$$\text{mk2ges\_au}(t) = \text{offset\_MK2ges\_100628b\_111027b} + \text{scale\_MK2ges\_100628b\_111027b} \cdot ([\text{MK2}] + [\text{pMK2}]) \quad (242)$$

Unit: conc. [a.u.]; With error model:

$$\sigma\{\text{mk2ges\_au}\}(t) = \text{sd\_MK2ges\_au} \quad (243)$$

| time<br>[min] | input_il1b<br>[ng · ml <sup>-1</sup> ] | p_p38_au<br>conc. [a.u.] | p_mk2_au<br>conc. [a.u.] |
|---------------|----------------------------------------|--------------------------|--------------------------|
| 0             | 0                                      | 2.36876e+06              | 2.86563e+06              |
| 0             | 0                                      | 2.44209e+06              | 2.73325e+06              |
| 10            | 1                                      | 2.34872e+06              | 2.59539e+06              |
| 20            | 1                                      | 2.16521e+06              | 2.26539e+06              |
| 40            | 1                                      | 2.43101e+06              | 2.49016e+06              |

Table 51: Experimental data for the experiment total\_mk2\_p38\_100628b\_page111027b\_wt\_il1\_1\_mk2\_p38

| intstd<br>[μL] | int_p_p38_au<br>conc. [a.u.] | int_p_mk2_au<br>conc. [a.u.] |
|----------------|------------------------------|------------------------------|
| 1              | 830642                       | 1.21564e+06                  |
| 5              | 1.15726e+06                  | 1.58153e+06                  |
| 10             | 1.53408e+06                  | 1.89023e+06                  |
| 20             | 2.53425e+06                  | 3.09650e+06                  |
| 40             | 4.99150e+06                  | 4.29449e+06                  |

Table 52: Internal standard for the experiment total\_mk2\_p38\_100628b\_page111027b\_wt\_il1\_1\_mk2\_p38

- **Observable:** p38ges\_au

$$p38ges\_au(t) = \text{offset\_p38ges\_100628b\_111027b} + \text{scale\_p38ges\_100628b\_111027b} \cdot ([p38] + [pp38]) \quad (244)$$

Unit: conc. [a.u.]; With error model:

$$\sigma\{p38ges\_au\}(t) = \text{sd\_p38ges\_au} \quad (245)$$

- **Observable:** int\_mk2ges\_au

$$\text{int\_mk2ges\_au}(\text{intstd}) = \text{offset\_MK2ges\_100628b\_111027b} + \frac{\text{scale\_MK2\_total} \cdot \text{scale\_MK2ges\_100628b\_111027b} \cdot \text{intstd}}{V} \quad (246)$$

Unit: conc. [a.u.]; With error model:

$$\sigma\{\text{int\_mk2ges\_au}\}(\text{intstd}) = \text{sd\_MK2ges\_au} \quad (247)$$

- **Observable:** int\_p38ges\_au

$$\text{int\_p38ges\_au}(\text{intstd}) = \text{offset\_p38ges\_100628b\_111027b} + \frac{\text{scale\_p38\_total} \cdot \text{scale\_p38ges\_100628b\_111027b} \cdot \text{intstd}}{V} \quad (248)$$

Unit: conc. [a.u.]; With error model:

$$\sigma\{\text{int\_p38ges\_au}\}(\text{intstd}) = \text{sd\_p38ges\_au} \quad (249)$$

**Conditions** To evaluate the ODE system of Equation 23 – 27 for the conditions in this experiment, the following parameter transformations are applied:

$$\begin{aligned} \text{input\_il1b} &\rightarrow 0 \mid 1 \\ \text{scale\_MK2ges\_100628b\_111027b} &\rightarrow \frac{\text{scale\_MK2ges\_100628b\_111027b}}{\text{init\_MK2}} \\ \text{scale\_p38ges\_100628b\_111027b} &\rightarrow \frac{\text{scale\_p38ges\_100628b\_111027b}}{\text{init\_p38}} \end{aligned}$$



Figure 31: 101029\_page101103\_wt\_sb203580.0u1u2u5\_IL1.0u1\_pmK2\_pp38 observables and experimental data for the experiment. The observables are displayed as solid lines. The error model that describes the measurement noise is indicated by shades.

### 2.2.26 Experiment: 101029\_page101103\_wt\_sb203580.0u1u2u5\_IL1.0u1\_pmK2\_pp38

**Comments** In this experiment the MK2 phosphorylation inhibitor SB203580 was applied. For this the primary hepatocytes were treated with 1 ng/ml IL-1 $\beta$  and SB203580 doses from 0–5  $\mu$ M. Additionally the internal standard was measured.

**Model fit and plots** The agreement of the model observables and the experimental data, given in Table 53 and 54, yields a value of the objective function  $-2 \log(L) = -133.303$  for 74 data points in this data set. The model observables and the experimental data is show in Figure 31.

**Observables** The following observables are added in this data set:

- **Observable:** p\_mk2\_au

$$p\_mk2\_au(t) = \text{offset\_gel\_pMK2.101029.101103} + [pMK2] \cdot \text{scale\_pMK2.101029.101103} \quad (250)$$

Unit: conc. [a.u.]; With error model:

$$\sigma\{p\_mk2\_au\}(t) = \text{sd\_pMK2\_au} \quad (251)$$

- **Observable:** p\_p38\_au

$$p\_p38\_au(t) = \text{offset\_gel\_pp38.101029.101103} + [pp38] \cdot \text{scale\_pp38.101029.101103} \quad (252)$$

| time<br>[min] | input_il1b<br>[ng · ml <sup>-1</sup> ] | input_sb203580<br>[ $\mu$ M] | p_p38_au<br>conc. [a.u.] | p_mk2_au<br>conc. [a.u.] |
|---------------|----------------------------------------|------------------------------|--------------------------|--------------------------|
| 0             | 1                                      | 0                            | 735284                   | 848361                   |
| 0             | 1                                      | 1                            | 603951                   | 697907                   |
| 0             | 1                                      | 2                            | 696307                   | 599446                   |
| 0             | 1                                      | 5                            | 611001                   | 529219                   |
| 5             | 1                                      | 0                            | 1.02896e+06              | 999565                   |
| 5             | 1                                      | 1                            | 722458                   | 740718                   |
| 5             | 1                                      | 2                            | 803861                   | 664841                   |
| 5             | 1                                      | 5                            | 671255                   | 521877                   |
| 10            | 1                                      | 0                            | 1.28109e+06              | 1.24114e+06              |
| 10            | 1                                      | 1                            | 1.09860e+06              | 1.00994e+06              |
| 10            | 1                                      | 2                            | 993429                   | 727516                   |
| 10            | 1                                      | 5                            | 837672                   | 634761                   |
| 15            | 1                                      | 0                            | 1.76656e+06              | 1.68886e+06              |
| 15            | 1                                      | 1                            | 1.31511e+06              | 871951                   |
| 15            | 1                                      | 2                            | 1.29623e+06              | 919964                   |
| 15            | 1                                      | 5                            | 931075                   | 544657                   |
| 30            | 1                                      | 0                            | 2.48634e+06              | 1.52388e+06              |
| 30            | 1                                      | 1                            | 1.29507e+06              | 1.21566e+06              |
| 30            | 1                                      | 2                            | 1.42330e+06              | 1.00706e+06              |
| 30            | 1                                      | 5                            | 1.17927e+06              | 609843                   |
| 40            | 1                                      | 0                            | 1.29936e+06              | 1.46279e+06              |
| 40            | 1                                      | 1                            | 1.38636e+06              | 1.26362e+06              |
| 40            | 1                                      | 2                            | 1.29148e+06              | 977088                   |
| 40            | 1                                      | 5                            | 1.05906e+06              | 577322                   |
| 60            | 1                                      | 0                            | 1.05453e+06              | 851922                   |
| 60            | 1                                      | 1                            | 1.03397e+06              | 929609                   |
| 60            | 1                                      | 2                            | 840976                   | 630960                   |
| 60            | 1                                      | 5                            | 1.27959e+06              | 645061                   |
| 0             | 1                                      | 0                            | 652016                   | 792501                   |
| 0             | 1                                      | 0                            | 580202                   | 520617                   |
| 0             | 1                                      | 0                            | 593352                   | 768107                   |
| 0             | 1                                      | 0                            | 557860                   | 534190                   |

Table 53: Experimental data for the experiment 101029\_page101103\_wt\_sb203580\_0u1u2u5\_IL1\_0u1\_pmk2\_pp38

| intstd<br>[ $\mu$ L] | int_p_p38_au<br>conc. [a.u.] | int_p_mk2_au<br>conc. [a.u.] |
|----------------------|------------------------------|------------------------------|
| 1                    | 595912                       | 571008                       |
| 5                    | 1.04455e+06                  | 630084                       |
| 10                   | 1.63935e+06                  | 942521                       |
| 20                   | 3.32822e+06                  | 2.15618e+06                  |
| 40                   | 5.99954e+06                  | 3.38350e+06                  |

Table 54: Internal standard for the experiment 101029\_page101103\_wt\_sb203580\_0u1u2u5\_IL1\_0u1\_pmk2\_pp38

Unit: conc. [a.u.]; With error model:

$$\sigma\{p\_p38\_au\}(t) = sd\_pp38\_au \quad (253)$$

• **Observable:** int\_p\_mk2\_au

$$int\_p\_mk2\_au(intstd) = offset\_gel\_pMK2\_101029\_101103 + \frac{scale\_pMK2 \cdot scale\_pMK2\_101029\_101103 \cdot intstd}{V} \quad (254)$$

Unit: conc. [a.u.]; With error model:

$$\sigma\{int\_p\_mk2\_au\}(intstd) = sd\_pMK2\_au \quad (255)$$

• **Observable:** int\_p\_p38\_au

$$int\_p\_p38\_au(intstd) = offset\_gel\_pp38\_101029\_101103 + \frac{scale\_pp38 \cdot scale\_pp38\_101029\_101103 \cdot intstd}{V} \quad (256)$$

Unit: conc. [a.u.]; With error model:

$$\sigma\{int\_p\_p38\_au\}(intstd) = sd\_pp38\_au \quad (257)$$

**Conditions** To evaluate the ODE system of Equation 23 – 27 for the conditions in this experiment, the following parameter transformations are applied:

$$\begin{aligned} input\_il1b &\rightarrow 1 \mid 1 \mid 1 \mid 1 \\ input\_sb203580 &\rightarrow 0 \mid 1 \mid 2 \mid 5 \\ scale\_pMK2\_101029\_101103 &\rightarrow \frac{scale\_pMK2\_101029\_101103}{init\_MK2} \\ scale\_pp38\_101029\_101103 &\rightarrow \frac{scale\_pp38\_101029\_101103}{init\_p38} \end{aligned}$$

| time<br>[min] | input_il1b<br>[ng · ml <sup>-1</sup> ] | input_sb203580<br>[μM] | p_p38_au<br>conc. [a.u.] | p_mk2_au<br>conc. [a.u.] |
|---------------|----------------------------------------|------------------------|--------------------------|--------------------------|
| 0             | 1                                      | 0                      | 103658                   | 586856                   |
| 0             | 1                                      | 1                      | 77856                    | 733768                   |
| 0             | 1                                      | 2                      | 74155                    | 698585                   |
| 0             | 1                                      | 5                      | 72443                    | 811885                   |
| 5             | 1                                      | 0                      | 312633                   | 923500                   |
| 5             | 1                                      | 1                      | 172327                   | 922656                   |
| 5             | 1                                      | 2                      | 157775                   | 700111                   |
| 5             | 1                                      | 5                      | 128307                   | 742669                   |
| 10            | 1                                      | 0                      | 667776                   | 1.47309e+06              |
| 10            | 1                                      | 1                      | 256140                   | 739410                   |
| 10            | 1                                      | 2                      | 247303                   | 780899                   |
| 10            | 1                                      | 5                      | 231791                   | 815149                   |
| 15            | 1                                      | 0                      | 549225                   | 1.42542e+06              |
| 15            | 1                                      | 1                      | 319101                   | 826135                   |
| 15            | 1                                      | 2                      | 308990                   | 986727                   |
| 15            | 1                                      | 5                      | 308797                   | 759980                   |
| 30            | 1                                      | 0                      | 959532                   | 1.48212e+06              |
| 30            | 1                                      | 1                      | 633826                   | 1.40186e+06              |
| 30            | 1                                      | 2                      | 440344                   | 767252                   |
| 30            | 1                                      | 5                      | 428702                   | 952018                   |
| 40            | 1                                      | 0                      | 758419                   | 1.44705e+06              |
| 40            | 1                                      | 1                      | 368355                   | 1.25521e+06              |
| 40            | 1                                      | 2                      | 438241                   | 953201                   |
| 40            | 1                                      | 5                      | 391364                   | 827865                   |
| 60            | 1                                      | 0                      | 74562                    | 1.10879e+06              |
| 60            | 1                                      | 1                      | 277138                   | 949016                   |
| 60            | 1                                      | 2                      | 235699                   | 845418                   |
| 60            | 1                                      | 5                      | 388385                   | 862444                   |
| 0             | 1                                      | 0                      | 102305                   | 793036                   |
| 0             | 1                                      | 0                      | 7909                     | 781798                   |
| 0             | 1                                      | 0                      | 92686                    | 816210                   |
| 0             | 1                                      | 0                      | 67749                    | 660193                   |

Table 55: Experimental data for the experiment 101029\_page101104\_wt\_sb203580\_0u1u2u5\_IL1\_0u1\_pmk2\_pp38

### 2.2.27 Experiment: 101029\_page101104\_wt\_sb203580\_0u1u2u5\_IL1\_0u1\_pmk2\_pp38

**Comments** In this experiment the MK2 phosphorylation inhibitor SB203580 was applied. For this the primary hepatocytes were treated with 1 ng/ml IL-1 $\beta$  and SB203580 doses from 0–5  $\mu$ M. Additionally the internal standard was measured.

**Model fit and plots** The agreement of the model observables and the experimental data, given in Table 55 and 56, yields a value of the objective function  $-2 \log(L) = -22.2383$  for 74 data points in this data set. The model observables and the experimental data is show in Figure 32.

**Observables** The following observables are added in this data set:

- **Observable:** p\_mk2\_au

$$p\_mk2\_au(t) = \text{offset\_gel\_pMK2\_101029\_101104} + [pMK2] \cdot \text{scale\_pMK2\_101029\_101104} \quad (258)$$

Unit: conc. [a.u.]; With error model:

$$\sigma\{p\_mk2\_au\}(t) = \text{sd\_pMK2\_au} \quad (259)$$

- **Observable:** p\_p38\_au

$$p\_p38\_au(t) = \text{offset\_gel\_pp38\_101029\_101104} + [pp38] \cdot \text{scale\_pp38\_101029\_101104} \quad (260)$$

Unit: conc. [a.u.]; With error model:

$$\sigma\{p\_p38\_au\}(t) = \text{sd\_pp38\_au} \quad (261)$$



Figure 32: 101029\_page101104\_wt\_sb203580\_0u1u2u5\_IL1\_0u1\_pmK2\_pp38 observables and experimental data for the experiment. The observables are displayed as solid lines. The error model that describes the measurement noise is indicated by shades.

| intstd            | int_p-p38_au | int_p-mk2_au |
|-------------------|--------------|--------------|
| [ $\mu\text{L}$ ] | conc. [a.u.] | conc. [a.u.] |
| 1                 | 39099        | 469560       |
| 5                 | 389222       | 678027       |
| 10                | 1.14619e+06  | 1.16915e+06  |
| 20                | 1.83635e+06  | 1.44178e+06  |
| 40                | 3.41852e+06  | 4.30400e+06  |

Table 56: Internal standard for the experiment 101029\_page101104\_wt\_sb203580\_0u1u2u5\_IL1\_0u1\_pmK2\_pp38

- **Observable:** `int_p_mk2_au`

$$\text{int\_p\_mk2\_au}(\text{intstd}) = \text{offset\_gel\_pMK2\_101029\_101104} + \frac{\text{scale\_pMK2} \cdot \text{scale\_pMK2\_101029\_101104} \cdot \text{intstd}}{V} \quad (262)$$

Unit: conc. [a.u.]; With error model:

$$\sigma\{\text{int\_p\_mk2\_au}\}(\text{intstd}) = \text{sd\_pMK2\_au} \quad (263)$$

- **Observable:** `int_p_p38_au`

$$\text{int\_p\_p38\_au}(\text{intstd}) = \text{offset\_gel\_pp38\_101029\_101104} + \frac{\text{scale\_pp38} \cdot \text{scale\_pp38\_101029\_101104} \cdot \text{intstd}}{V} \quad (264)$$

Unit: conc. [a.u.]; With error model:

$$\sigma\{\text{int\_p\_p38\_au}\}(\text{intstd}) = \text{sd\_pp38\_au} \quad (265)$$

**Conditions** To evaluate the ODE system of Equation 23 – 27 for the conditions in this experiment, the following parameter transformations are applied:

$$\begin{array}{lcl} \text{input\_il1b} & \rightarrow & \begin{array}{c|c|c|c} 1 & 1 & 1 & 1 \\ \hline \text{input\_sb203580} & \rightarrow & 0 & 1 & 2 & 5 \end{array} \end{array}$$

$$\text{scale\_pMK2\_101029\_101104} \rightarrow \frac{\text{scale\_pMK2\_101029\_101104}}{\text{init\_MK2}}$$

$$\text{scale\_pp38\_101029\_101104} \rightarrow \frac{\text{scale\_pp38\_101029\_101104}}{\text{init\_p38}}$$



**Figure 33: phosphatase\_inhibitor\_121024\_pagewb121029** observables and experimental data for the experiment. The observables are displayed as solid lines. The error model that describes the measurement noise is indicated by shades.

### 2.2.28 Experiment: phosphatase\_inhibitor\_121024\_pagewb121029

**Comments** In this experiment the cells were treated with phosphatase inhibitors. After 30 minutes 1 ng/ml IL-1 $\beta$  was added. This is modeled by an inverse tangent which turns from zero to one at 30 minutes.

**Modelfit and plots** The agreement of the model observables and the experimental data, given in Table 57, yields a value of the objective function  $-2\log(L) = -21.8964$  for 24 data points in this data set. The model observables and the experimental data is show in Figure 33.

**Input variables** The following inputs variables are modified in this data set:

- **Input variable 1: IL1b**

$$[\text{IL1b}](t) = \text{input\_il1b} \cdot \left( \frac{\arctan(1000.0 \cdot t - 30000.0)}{\pi} + \frac{1}{2} \right) \quad (266)$$

**Observables** The following observables are added in this data set:

- **Observable: p\_mk2\_au**

$$\text{p\_mk2\_au}(t) = \text{offset\_gel\_pMK2\_121024\_wb121029} + [\text{pMK2}] \cdot \text{scale\_pMK2\_121024\_wb121029} \quad (267)$$

| time<br>[min] | input_il1b<br>[ng · ml <sup>-1</sup> ] | input_phosphaInh<br>[μM] | p_p38_au<br>conc. [a.u.] | p_mk2_au<br>conc. [a.u.] |
|---------------|----------------------------------------|--------------------------|--------------------------|--------------------------|
| 0             | 1                                      | 0                        | 1.16717e+06              | 74139                    |
| 30            | 0                                      | 200                      | 2.60536e+06              | 279697                   |
| 50            | 1                                      | 0                        | 1.01351e+07              | 1.57927e+06              |
| 50            | 1                                      | 200                      | 1.09184e+07              | 1.89352e+06              |
| 60            | 1                                      | 0                        | 8.30094e+06              | 1.34497e+06              |
| 60            | 1                                      | 200                      | 1.11480e+07              | 1.87178e+06              |
| 70            | 1                                      | 0                        | 5.42071e+06              | 928693                   |
| 70            | 1                                      | 200                      | 6.27355e+06              | 1.58877e+06              |
| 80            | 1                                      | 0                        | 2.71386e+06              | 489766                   |
| 80            | 1                                      | 200                      | 5.29587e+06              | 1.21616e+06              |
| 90            | 1                                      | 0                        | 2.74134e+06              | 359892                   |
| 90            | 1                                      | 200                      | 4.07690e+06              | 877404                   |

**Table 57: Experimental data for the experiment phosphatase\_inhibitor\_121024\_pagewb121029**

Unit: conc. [a.u.]; With error model:

$$\sigma\{p\_mk2\_au\}(t) = \text{sd\_pMK2\_phosphaInh\_au} \quad (268)$$

• **Observable:** p\_p38\_au

$$p\_p38\_au(t) = \text{offset\_gel\_pp38\_121024\_wb121029} + [pp38] \cdot \text{scale\_pp38\_121024\_wb121029} \quad (269)$$

Unit: conc. [a.u.]; With error model:

$$\sigma\{p\_p38\_au\}(t) = \text{sd\_pp38\_phosphaInh\_au} \quad (270)$$

**Conditions** To evaluate the ODE system of Equation 23 – 27 for the conditions in this experiment, the following parameter transformations are applied:

$$\begin{aligned} \text{input\_il1b} &\rightarrow 0 \mid 1 \mid 1 \\ \text{input\_phosphaInh} &\rightarrow 200 \mid 0 \mid 200 \\ \text{scale\_pMK2\_121024\_wb121029} &\rightarrow \frac{\text{scale\_pMK2\_121024\_wb121029}}{\text{init\_MK2}} \\ \text{scale\_pp38\_121024\_wb121029} &\rightarrow \frac{\text{scale\_pp38\_121024\_wb121029}}{\text{init\_p38}} \end{aligned}$$



**Figure 34: phosphatase\_inhibitor\_121031A\_pagewb121105 observables and experimental data for the experiment.** The observables are displayed as solid lines. The error model that describes the measurement noise is indicated by shades.

### 2.2.29 Experiment: phosphatase\_inhibitor\_121031A\_pagewb121105

**Comments** In this experiment the cells were treated with phosphatase inhibitors. After 30 minutes 1 ng/ml IL-1 $\beta$  was added. This is modeled by an inverse tangent which turns from zero to one at 30 minutes.

**Modelfit and plots** The agreement of the model observables and the experimental data, given in Table 58, yields a value of the objective function  $-2\log(L) = -27.5417$  for 24 data points in this data set. The model observables and the experimental data is show in Figure 34.

**Input variables** The following inputs variables are modified in this data set:

- **Input variable 1: IL1b**

$$[\text{IL1b}](t) = \text{input\_il1b} \cdot \left( \frac{\arctan(1000.0 \cdot t - 30000.0)}{\pi} + \frac{1}{2} \right) \quad (271)$$

**Observables** The following observables are added in this data set:

- **Observable: p\_mk2\_au**

$$\text{p\_mk2\_au}(t) = \text{offset\_gel\_pMK2\_121031A\_wb121105} + [\text{pMK2}] \cdot \text{scale\_pMK2\_121031A\_wb121105} \quad (272)$$

| time<br>[min] | input_il1b<br>[ng · ml <sup>-1</sup> ] | input_phosphaInh<br>[μM] | p_p38_au<br>conc. [a.u.] | p_mk2_au<br>conc. [a.u.] |
|---------------|----------------------------------------|--------------------------|--------------------------|--------------------------|
| 0             | 1                                      | 0                        | 89268                    | 386742                   |
| 30            | 0                                      | 200                      | 325608                   | 1.12428e+06              |
| 50            | 1                                      | 0                        | 553657                   | 1.85810e+06              |
| 50            | 1                                      | 200                      | 586548                   | 1.87078e+06              |
| 60            | 1                                      | 0                        | 906081                   | 1.80025e+06              |
| 60            | 1                                      | 200                      | 1.23349e+06              | 2.57584e+06              |
| 70            | 1                                      | 0                        | 489339                   | 1.83536e+06              |
| 70            | 1                                      | 200                      | 857009                   | 2.22222e+06              |
| 80            | 1                                      | 0                        | 321624                   | 1.14132e+06              |
| 80            | 1                                      | 200                      | 458335                   | 2.28364e+06              |
| 90            | 1                                      | 0                        | 314085                   | 934820                   |
| 90            | 1                                      | 200                      | 547105                   | 1.99048e+06              |

**Table 58: Experimental data for the experiment phosphatase\_inhibitor\_121031A\_pagewb121105**

Unit: conc. [a.u.]; With error model:

$$\sigma\{p\_mk2\_au\}(t) = \text{sd\_pMK2\_phosphaInh\_au} \quad (273)$$

• **Observable:** p\_p38\_au

$$p\_p38\_au(t) = \text{offset\_gel\_pp38\_121031A\_wb121105} + [pp38] \cdot \text{scale\_pp38\_121031A\_wb121105} \quad (274)$$

Unit: conc. [a.u.]; With error model:

$$\sigma\{p\_p38\_au\}(t) = \text{sd\_pp38\_phosphaInh\_au} \quad (275)$$

**Conditions** To evaluate the ODE system of Equation 23 – 27 for the conditions in this experiment, the following parameter transformations are applied:

$$\begin{aligned} \text{input\_il1b} &\rightarrow 0 \mid 1 \mid 1 \\ \text{input\_phosphaInh} &\rightarrow 200 \mid 0 \mid 200 \\ \text{scale\_pMK2\_121031A\_wb121105} &\rightarrow \frac{\text{scale\_pMK2\_121031A\_wb121105}}{\text{init\_MK2}} \\ \text{scale\_pp38\_121031A\_wb121105} &\rightarrow \frac{\text{scale\_pp38\_121031A\_wb121105}}{\text{init\_p38}} \end{aligned}$$



**Figure 35: phosphatase\_inhibitor\_121031B\_pagewb121105 observables and experimental data for the experiment.** The observables are displayed as solid lines. The error model that describes the measurement noise is indicated by shades.

### 2.2.30 Experiment: phosphatase\_inhibitor\_121031B\_pagewb121105

**Comments** In this experiment the cells were treated with phosphatase inhibitors. After 30 minutes 1 ng/ml IL-1 $\beta$  was added. This is modeled by an inverse tangent which turns from zero to one at 30 minutes.

**Modelfit and plots** The agreement of the model observables and the experimental data, given in Table 59, yields a value of the objective function  $-2\log(L) = -27.89$  for 24 data points in this data set. The model observables and the experimental data is show in Figure 35.

**Input variables** The following inputs variables are modified in this data set:

- **Input variable 1: IL1b**

$$[\text{IL1b}](t) = \text{input\_il1b} \cdot \left( \frac{\arctan(1000.0 \cdot t - 30000.0)}{\pi} + \frac{1}{2} \right) \quad (276)$$

**Observables** The following observables are added in this data set:

- **Observable: p\_mk2\_au**

$$\text{p\_mk2\_au}(t) = \text{offset\_gel\_pMK2\_121031B\_wb121105} + [\text{pMK2}] \cdot \text{scale\_pMK2\_121031B\_wb121105} \quad (277)$$

| time<br>[min] | input_il1b<br>[ng · ml <sup>-1</sup> ] | input_phosphaInh<br>[μM] | p_p38_au<br>conc. [a.u.] | p_mk2_au<br>conc. [a.u.] |
|---------------|----------------------------------------|--------------------------|--------------------------|--------------------------|
| 0             | 1                                      | 0                        | 177029                   | 108376                   |
| 30            | 0                                      | 200                      | 521556                   | 243801                   |
| 50            | 1                                      | 0                        | 828271                   | 495849                   |
| 50            | 1                                      | 200                      | 1.11618e+06              | 892591                   |
| 60            | 1                                      | 0                        | 370678                   | 574631                   |
| 60            | 1                                      | 200                      | 1.63418e+06              | 1.27762e+06              |
| 70            | 1                                      | 0                        | 812240                   | 572737                   |
| 70            | 1                                      | 200                      | 1.48880e+06              | 1.07299e+06              |
| 80            | 1                                      | 0                        | 515901                   | 275781                   |
| 80            | 1                                      | 200                      | 1.06130e+06              | 472729                   |
| 90            | 1                                      | 0                        | 454857                   | 356962                   |
| 90            | 1                                      | 200                      | 909068                   | 783494                   |

**Table 59: Experimental data for the experiment phosphatase\_inhibitor\_121031B\_pagewb121105**

Unit: conc. [a.u.]; With error model:

$$\sigma\{p\_mk2\_au\}(t) = \text{sd\_pMK2\_phosphaInh\_au} \quad (278)$$

• **Observable:** p\_p38\_au

$$p\_p38\_au(t) = \text{offset\_gel\_pp38\_121031B\_wb121105} + [pp38] \cdot \text{scale\_pp38\_121031B\_wb121105} \quad (279)$$

Unit: conc. [a.u.]; With error model:

$$\sigma\{p\_p38\_au\}(t) = \text{sd\_pp38\_phosphaInh\_au} \quad (280)$$

**Conditions** To evaluate the ODE system of Equation 23 – 27 for the conditions in this experiment, the following parameter transformations are applied:

$$\begin{aligned} \text{input\_il1b} &\rightarrow 0 \mid 1 \mid 1 \\ \text{input\_phosphaInh} &\rightarrow 200 \mid 0 \mid 200 \\ \text{scale\_pMK2\_121031B\_wb121105} &\rightarrow \frac{\text{scale\_pMK2\_121031B\_wb121105}}{\text{init\_MK2}} \\ \text{scale\_pp38\_121031B\_wb121105} &\rightarrow \frac{\text{scale\_pp38\_121031B\_wb121105}}{\text{init\_p38}} \end{aligned}$$



**Figure 36: phosphatase\_inhibitor\_121114A\_pagewb121119** observables and experimental data for the experiment. The observables are displayed as solid lines. The error model that describes the measurement noise is indicated by shades.

### 2.2.31 Experiment: phosphatase\_inhibitor\_121114A\_pagewb121119

**Comments** In this experiment the cells were treated with phosphatase inhibitors. After 30 minutes 1 ng/ml IL-1 $\beta$  was added. This is modeled by an inverse tangent which turns from zero to one at 30 minutes.

**Model fit and plots** The agreement of the model observables and the experimental data, given in Table 60, yields a value of the objective function  $-2\log(L) = -32.0982$  for 24 data points in this data set. The model observables and the experimental data is show in Figure 36.

**Input variables** The following inputs variables are modified in this data set:

- **Input variable 1: IL1b**

$$[\text{IL1b}](t) = \text{input\_il1b} \cdot \left( \frac{\arctan(1000.0 \cdot t - 30000.0)}{\pi} + \frac{1}{2} \right) \quad (281)$$

**Observables** The following observables are added in this data set:

- **Observable: p\_mk2\_au**

$$\text{p\_mk2\_au}(t) = \text{offset\_gel\_pMK2\_121114A\_wb121119} + [\text{pMK2}] \cdot \text{scale\_pMK2\_121114A\_wb121119} \quad (282)$$

| time<br>[min] | input_il1b<br>[ng · ml <sup>-1</sup> ] | input_phosphaInh<br>[μM] | p_p38_au<br>conc. [a.u.] | p_mk2_au<br>conc. [a.u.] |
|---------------|----------------------------------------|--------------------------|--------------------------|--------------------------|
| 0             | 1                                      | 0                        | 149371                   | 152581                   |
| 30            | 0                                      | 200                      | 107611                   | 423049                   |
| 50            | 1                                      | 0                        | 242583                   | 432968                   |
| 50            | 1                                      | 200                      | 864848                   | 742429                   |
| 60            | 1                                      | 0                        | 525795                   | 424501                   |
| 60            | 1                                      | 200                      | 810508                   | 816665                   |
| 70            | 1                                      | 0                        | 286639                   | 424908                   |
| 70            | 1                                      | 200                      | 417462                   | 849717                   |
| 80            | 1                                      | 0                        | 207168                   | 354398                   |
| 80            | 1                                      | 200                      | 521571                   | 699460                   |
| 90            | 1                                      | 0                        | 137469                   | 247320                   |
| 90            | 1                                      | 200                      | 386281                   | 609517                   |

**Table 60: Experimental data for the experiment phosphatase\_inhibitor\_121114A\_pagewb121119**

Unit: conc. [a.u.]; With error model:

$$\sigma\{p\_mk2\_au\}(t) = \text{sd\_pMK2\_phosphaInh\_au} \quad (283)$$

• **Observable:** p\_p38\_au

$$p\_p38\_au(t) = \text{offset\_gel\_pp38\_121114A\_wb121119} + [pp38] \cdot \text{scale\_pp38\_121114A\_wb121119} \quad (284)$$

Unit: conc. [a.u.]; With error model:

$$\sigma\{p\_p38\_au\}(t) = \text{sd\_pp38\_phosphaInh\_au} \quad (285)$$

**Conditions** To evaluate the ODE system of Equation 23 – 27 for the conditions in this experiment, the following parameter transformations are applied:

$$\begin{array}{lcl} \text{input\_il1b} & \rightarrow & 0 \mid 1 \mid 1 \\ \text{input\_phosphaInh} & \rightarrow & 200 \mid 0 \mid 200 \end{array}$$

$$\text{scale\_pMK2\_121114A\_wb121119} \rightarrow \frac{\text{scale\_pMK2\_121114A\_wb121119}}{\text{init\_MK2}}$$

$$\text{scale\_pp38\_121114A\_wb121119} \rightarrow \frac{\text{scale\_pp38\_121114A\_wb121119}}{\text{init\_p38}}$$



**Figure 37: phosphatase\_inhibitor\_121114B\_pagewb121119 observables and experimental data for the experiment.** The observables are displayed as solid lines. The error model that describes the measurement noise is indicated by shades.

### 2.2.32 Experiment: phosphatase\_inhibitor\_121114B\_pagewb121119

**Comments** In this experiment the cells were treated with phosphatase inhibitors. After 30 minutes 1 ng/ml IL-1 $\beta$  was added. This is modeled by an inverse tangent which turns from zero to one at 30 minutes.

**Modelfit and plots** The agreement of the model observables and the experimental data, given in Table 61, yields a value of the objective function  $-2\log(L) = -27.3527$  for 24 data points in this data set. The model observables and the experimental data is show in Figure 37.

**Input variables** The following inputs variables are modified in this data set:

- **Input variable 1: IL1b**

$$[\text{IL1b}](t) = \text{input\_il1b} \cdot \left( \frac{\arctan(1000.0 \cdot t - 30000.0)}{\pi} + \frac{1}{2} \right) \quad (286)$$

**Observables** The following observables are added in this data set:

- **Observable: p\_mk2\_au**

$$\text{p\_mk2\_au}(t) = \text{offset\_gel\_pMK2.121114B.wb121119} + [\text{pMK2}] \cdot \text{scale\_pMK2.121114B.wb121119} \quad (287)$$

| time<br>[min] | input_il1b<br>[ng · ml <sup>-1</sup> ] | input_phosphaInh<br>[μM] | p_p38_au<br>conc. [a.u.] | p_mk2_au<br>conc. [a.u.] |
|---------------|----------------------------------------|--------------------------|--------------------------|--------------------------|
| 0             | 1                                      | 0                        | 124097                   | 198255                   |
| 30            | 0                                      | 200                      | 325015                   | 548473                   |
| 50            | 1                                      | 0                        | 324828                   | 494813                   |
| 50            | 1                                      | 200                      | 624428                   | 913986                   |
| 60            | 1                                      | 0                        | 324602                   | 379371                   |
| 60            | 1                                      | 200                      | 745521                   | 764129                   |
| 70            | 1                                      | 0                        | 226158                   | 463513                   |
| 70            | 1                                      | 200                      | 397655                   | 1.04176e+06              |
| 80            | 1                                      | 0                        | 180346                   | 356365                   |
| 80            | 1                                      | 200                      | 451579                   | 963283                   |
| 90            | 1                                      | 0                        | 165000                   | 245840                   |
| 90            | 1                                      | 200                      | 444486                   | 683812                   |

**Table 61: Experimental data for the experiment phosphatase\_inhibitor\_121114B\_pagewb121119**

Unit: conc. [a.u.]; With error model:

$$\sigma\{p\_mk2\_au\}(t) = \text{sd\_pMK2\_phosphaInh\_au} \quad (288)$$

• **Observable:** p\_p38\_au

$$p\_p38\_au(t) = \text{offset\_gel\_pp38\_121114B\_wb121119} + [pp38] \cdot \text{scale\_pp38\_121114B\_wb121119} \quad (289)$$

Unit: conc. [a.u.]; With error model:

$$\sigma\{p\_p38\_au\}(t) = \text{sd\_pp38\_phosphaInh\_au} \quad (290)$$

**Conditions** To evaluate the ODE system of Equation 23 – 27 for the conditions in this experiment, the following parameter transformations are applied:

$$\begin{aligned} \text{input\_il1b} &\rightarrow 0 \mid 1 \mid 1 \\ \text{input\_phosphaInh} &\rightarrow 200 \mid 0 \mid 200 \\ \text{scale\_pMK2\_121114B\_wb121119} &\rightarrow \frac{\text{scale\_pMK2\_121114B\_wb121119}}{\text{init\_MK2}} \\ \text{scale\_pp38\_121114B\_wb121119} &\rightarrow \frac{\text{scale\_pp38\_121114B\_wb121119}}{\text{init\_p38}} \end{aligned}$$



**Figure 38:** Sorted values of the objective function obtained by 1000 parameter estimation runs initialized with parameter sets chosen by a latin hypercube sampling. The different levels correspond to different local optima. More than 65 % of all fits reached the lowest local optimum. This is a strong indication that we found the global optimum.

### 2.3 Estimated model parameters

In total 169 parameters are estimated from the experimental data. In order to reveal possible local optima we performed in total 1000 parameter estimation runs with different random sampled starting parameters. More than 650 runs directed to the same optimum, which is a strong hint that we found the global optimum (Figure 38). Local minima were found by our approach, however, at likelihood values that are significantly worse than the global optimum and can be neglected for the further investigation. The best optimum yields a value of the objective function  $-2\log(L) = -2113.29$  for a total of 1676 data points. The model parameter were estimated by maximum likelihood estimation applying the MATLAB lsqnonlin algorithm. In Table 62–65 the estimated parameter values are given. Parameters highlighted in red color indicate parameter values close to their bounds. The parameter name prefix `init_` indicates the initial value of a dynamic variable. The parameter name prefix `offset_` indicates a offset of the experimental data. The parameter name prefix `scale_` indicates a scaling factor of the experimental data. The parameter name prefix `sd_` indicates the magnitude of the measurement noise for a specific measurement.

|    | name                             | $\theta_{min}$ | $\hat{\theta}$ | $\theta_{max}$ | log | non-log $\hat{\theta}$ | fitted |
|----|----------------------------------|----------------|----------------|----------------|-----|------------------------|--------|
| 1  | V                                | -5             | -0.0355        | +3             | 1   | $+9.21 \cdot 10^{-01}$ | 1      |
| 2  | conc_MK2_total_calibrator        | -5             | -0.5154        | +8             | 1   | $+3.05 \cdot 10^{-01}$ | 1      |
| 3  | conc_p38_total_calibrator        | -5             | +0.1990        | +8             | 1   | $+1.58 \cdot 10^{+00}$ | 1      |
| 4  | dePhospho_inh                    | -5             | -2.1641        | +3             | 1   | $+6.85 \cdot 10^{-03}$ | 1      |
| 5  | il1b_sat                         | -5             | -0.2806        | +3             | 1   | $+5.24 \cdot 10^{-01}$ | 1      |
| 6  | init_MK2                         | -5             | +0.6582        | +3             | 1   | $+4.55 \cdot 10^{+00}$ | 1      |
| 7  | init_p38                         | -5             | -0.4462        | +3             | 1   | $+3.58 \cdot 10^{-01}$ | 1      |
| 8  | intstd_in_MK2_total_calibrator   | -5             | +0.0773        | +8             | 1   | $+1.19 \cdot 10^{+00}$ | 1      |
| 9  | intstd_in_p38_total_calibrator   | -5             | +1.8997        | +8             | 1   | $+7.94 \cdot 10^{+01}$ | 1      |
| 10 | intstd_in_pMK2_calibrator        | -5             | +0.4249        | +8             | 1   | $+2.66 \cdot 10^{+00}$ | 1      |
| 11 | intstd_in_pp38_calibrator        | -5             | +1.7431        | +8             | 1   | $+5.53 \cdot 10^{+01}$ | 1      |
| 12 | mk2_act_p38                      | -5             | +1.0070        | +3             | 1   | $+1.02 \cdot 10^{+01}$ | 1      |
| 13 | mk2_dea                          | -5             | -0.1461        | +3             | 1   | $+7.14 \cdot 10^{-01}$ | 1      |
| 14 | mk2_inh_sb                       | -5             | +0.0113        | +3             | 1   | $+1.03 \cdot 10^{+00}$ | 1      |
| 15 | mkp_prod_pp38                    | -5             | -2.0752        | +3             | 1   | $+8.41 \cdot 10^{-03}$ | 1      |
| 16 | offset_BSA_MK2_total             | -5             | +7.5103        | +1e+01         | 1   | $+3.24 \cdot 10^{+07}$ | 1      |
| 17 | offset_BSA_p38_total             | -5             | +7.5837        | +1e+01         | 1   | $+3.83 \cdot 10^{+07}$ | 1      |
| 18 | offset_MK2ges_100421_111026a     | -5             | +6.0172        | +9             | 1   | $+1.04 \cdot 10^{+06}$ | 1      |
| 19 | offset_MK2ges_100504_111027a     | -5             | +6.0242        | +9             | 1   | $+1.06 \cdot 10^{+06}$ | 1      |
| 20 | offset_MK2ges_100504_111027b     | -5             | +6.0337        | +9             | 1   | $+1.08 \cdot 10^{+06}$ | 1      |
| 21 | offset_MK2ges_100628b_111027b    | -5             | +6.0567        | +9             | 1   | $+1.14 \cdot 10^{+06}$ | 1      |
| 22 | offset_cal_intstd_MK2_total      | -5             | +5.7909        | +8             | 1   | $+6.18 \cdot 10^{+05}$ | 1      |
| 23 | offset_cal_intstd_p38_total      | -5             | +5.4939        | +8             | 1   | $+3.12 \cdot 10^{+05}$ | 1      |
| 24 | offset_cal_intstd_pMK2           | -5             | +5.6331        | +8             | 1   | $+4.30 \cdot 10^{+05}$ | 1      |
| 25 | offset_cal_intstd_pp38           | -5             | +5.7534        | +8             | 1   | $+5.67 \cdot 10^{+05}$ | 1      |
| 26 | offset_gel_pMK2_090102           | -5             | +4.2896        | +9             | 1   | $+1.95 \cdot 10^{+04}$ | 1      |
| 27 | offset_gel_pMK2_090615d_090922a  | -5             | +4.4093        | +9             | 1   | $+2.57 \cdot 10^{+04}$ | 1      |
| 28 | offset_gel_pMK2_090615d_090922b  | -5             | +4.4304        | +9             | 1   | $+2.69 \cdot 10^{+04}$ | 1      |
| 29 | offset_gel_pMK2_090615d_090922d  | -5             | +4.4950        | +9             | 1   | $+3.13 \cdot 10^{+04}$ | 1      |
| 30 | offset_gel_pMK2_090615d_100416   | -5             | -5.0000        | +9             | 1   | $+1.00 \cdot 10^{-05}$ | 1      |
| 31 | offset_gel_pMK2_090615d_110419   | -5             | -5.0000        | +9             | 1   | $+1.00 \cdot 10^{-05}$ | 1      |
| 32 | offset_gel_pMK2_100241_100428    | -5             | +5.8299        | +9             | 1   | $+6.76 \cdot 10^{+05}$ | 1      |
| 33 | offset_gel_pMK2_100241_100430    | -5             | -5.0000        | +9             | 1   | $+1.00 \cdot 10^{-05}$ | 1      |
| 34 | offset_gel_pMK2_100241_100505    | -5             | +5.8473        | +9             | 1   | $+7.03 \cdot 10^{+05}$ | 1      |
| 35 | offset_gel_pMK2_100504_100512    | -5             | +5.7662        | +9             | 1   | $+5.84 \cdot 10^{+05}$ | 1      |
| 36 | offset_gel_pMK2_100504_100520    | -5             | +5.9173        | +9             | 1   | $+8.27 \cdot 10^{+05}$ | 1      |
| 37 | offset_gel_pMK2_100504_100527    | -5             | +5.8801        | +9             | 1   | $+7.59 \cdot 10^{+05}$ | 1      |
| 38 | offset_gel_pMK2_100517_100610a   | -5             | +5.8992        | +9             | 1   | $+7.93 \cdot 10^{+05}$ | 1      |
| 39 | offset_gel_pMK2_100517_100610b   | -5             | +5.9955        | +9             | 1   | $+9.90 \cdot 10^{+05}$ | 1      |
| 40 | offset_gel_pMK2_100628b_100727   | -5             | +5.9865        | +9             | 1   | $+9.69 \cdot 10^{+05}$ | 1      |
| 41 | offset_gel_pMK2_100628b_100728a  | -5             | +5.9107        | +9             | 1   | $+8.14 \cdot 10^{+05}$ | 1      |
| 42 | offset_gel_pMK2_100628b_100728b  | -5             | +5.8436        | +9             | 1   | $+6.98 \cdot 10^{+05}$ | 1      |
| 43 | offset_gel_pMK2_101029_101103    | -5             | +5.7141        | +9             | 1   | $+5.18 \cdot 10^{+05}$ | 1      |
| 44 | offset_gel_pMK2_101029_101104    | -5             | +5.7991        | +9             | 1   | $+6.30 \cdot 10^{+05}$ | 1      |
| 45 | offset_gel_pMK2_110317a_110406a  | -5             | +3.0145        | +9             | 1   | $+1.03 \cdot 10^{+03}$ | 1      |
| 46 | offset_gel_pMK2_110317b_110405a  | -5             | +3.0962        | +9             | 1   | $+1.25 \cdot 10^{+03}$ | 1      |
| 47 | offset_gel_pMK2_110317b_110405b  | -5             | +2.8479        | +9             | 1   | $+7.05 \cdot 10^{+02}$ | 1      |
| 48 | offset_gel_pMK2_121024_wb121029  | -5             | +3.8283        | +9             | 1   | $+6.73 \cdot 10^{+03}$ | 1      |
| 49 | offset_gel_pMK2_121031A_wb121105 | -5             | +5.7038        | +9             | 1   | $+5.06 \cdot 10^{+05}$ | 1      |

**Table 62: Estimated parameter values**

$\hat{\theta}$  indicates the estimated value of the parameters.  $\theta_{min}$  and  $\theta_{max}$  indicate the upper and lower bounds for the parameters. The log-column indicates if the value of a parameter was log-transformed. If log = 1 the non-log-column indicates the non-logarithmic value of the estimate. The fitted-column indicates if the parameter value was estimated (1), was temporarily fixed (0) or if its value was fixed to a constant value (2).

|    | name                             | $\theta_{min}$ | $\hat{\theta}$ | $\theta_{max}$ | log | non-log $\hat{\theta}$ | fitted |
|----|----------------------------------|----------------|----------------|----------------|-----|------------------------|--------|
| 50 | offset_gel_pMK2_121031B_wb121105 | -5             | +4.9546        | +9             | 1   | $+9.01 \cdot 10^{+04}$ | 1      |
| 51 | offset_gel_pMK2_121114A_wb121119 | -5             | +5.2362        | +9             | 1   | $+1.72 \cdot 10^{+05}$ | 1      |
| 52 | offset_gel_pMK2_121114B_wb121119 | -5             | +5.3162        | +9             | 1   | $+2.07 \cdot 10^{+05}$ | 1      |
| 53 | offset_gel_pp38_090615d_090922a  | -5             | -5.0000        | +9             | 1   | $+1.00 \cdot 10^{-05}$ | 1      |
| 54 | offset_gel_pp38_090615d_090922b  | -5             | -5.0000        | +9             | 1   | $+1.00 \cdot 10^{-05}$ | 1      |
| 55 | offset_gel_pp38_090615d_090922d  | -5             | -4.9914        | +9             | 1   | $+1.02 \cdot 10^{-05}$ | 1      |
| 56 | offset_gel_pp38_090615d_100416   | -5             | +5.1495        | +9             | 1   | $+1.41 \cdot 10^{+05}$ | 1      |
| 57 | offset_gel_pp38_090615d_110419   | -5             | -5.0000        | +9             | 1   | $+1.00 \cdot 10^{-05}$ | 1      |
| 58 | offset_gel_pp38_100241_100428    | -5             | +5.7216        | +9             | 1   | $+5.27 \cdot 10^{+05}$ | 1      |
| 59 | offset_gel_pp38_100241_100430    | -5             | +5.7253        | +9             | 1   | $+5.31 \cdot 10^{+05}$ | 1      |
| 60 | offset_gel_pp38_100241_100505    | -5             | +5.6845        | +9             | 1   | $+4.84 \cdot 10^{+05}$ | 1      |
| 61 | offset_gel_pp38_100504_100512    | -5             | +5.6026        | +9             | 1   | $+4.00 \cdot 10^{+05}$ | 1      |
| 62 | offset_gel_pp38_100504_100520    | -5             | +5.8084        | +9             | 1   | $+6.43 \cdot 10^{+05}$ | 1      |
| 63 | offset_gel_pp38_100504_100527    | -5             | +5.7863        | +9             | 1   | $+6.11 \cdot 10^{+05}$ | 1      |
| 64 | offset_gel_pp38_100517_100610a   | -5             | +5.7604        | +9             | 1   | $+5.76 \cdot 10^{+05}$ | 1      |
| 65 | offset_gel_pp38_100517_100610b   | -5             | +5.7604        | +9             | 1   | $+5.76 \cdot 10^{+05}$ | 1      |
| 66 | offset_gel_pp38_100628b_100727   | -5             | +5.7763        | +9             | 1   | $+5.97 \cdot 10^{+05}$ | 1      |
| 67 | offset_gel_pp38_100628b_100728a  | -5             | +5.7139        | +9             | 1   | $+5.17 \cdot 10^{+05}$ | 1      |
| 68 | offset_gel_pp38_100628b_100728b  | -5             | +5.7219        | +9             | 1   | $+5.27 \cdot 10^{+05}$ | 1      |
| 69 | offset_gel_pp38_100708_100715    | -5             | +5.7211        | +9             | 1   | $+5.26 \cdot 10^{+05}$ | 1      |
| 70 | offset_gel_pp38_101029_101103    | -5             | +5.7268        | +9             | 1   | $+5.33 \cdot 10^{+05}$ | 1      |
| 71 | offset_gel_pp38_101029_101104    | -5             | +4.4295        | +9             | 1   | $+2.69 \cdot 10^{+04}$ | 1      |
| 72 | offset_gel_pp38_110317a_110406a  | -5             | +4.0614        | +9             | 1   | $+1.15 \cdot 10^{+04}$ | 1      |
| 73 | offset_gel_pp38_110317b_110405a  | -5             | +4.3062        | +9             | 1   | $+2.02 \cdot 10^{+04}$ | 1      |
| 74 | offset_gel_pp38_110317b_110405b  | -5             | +4.3315        | +9             | 1   | $+2.15 \cdot 10^{+04}$ | 1      |
| 75 | offset_gel_pp38_121024_wb121029  | -5             | +6.0517        | +9             | 1   | $+1.13 \cdot 10^{+06}$ | 1      |
| 76 | offset_gel_pp38_121031A_wb121105 | -5             | +5.0689        | +9             | 1   | $+1.17 \cdot 10^{+05}$ | 1      |
| 77 | offset_gel_pp38_121031B_wb121105 | -5             | +5.3367        | +9             | 1   | $+2.17 \cdot 10^{+05}$ | 1      |
| 78 | offset_gel_pp38_121114A_wb121119 | -5             | +4.9382        | +9             | 1   | $+8.67 \cdot 10^{+04}$ | 1      |
| 79 | offset_gel_pp38_121114B_wb121119 | -5             | +5.1487        | +9             | 1   | $+1.41 \cdot 10^{+05}$ | 1      |
| 80 | offset_p38ges_100421_111026a     | -5             | +6.0465        | +9             | 1   | $+1.11 \cdot 10^{+06}$ | 1      |
| 81 | offset_p38ges_100504_111027a     | -5             | +5.9650        | +9             | 1   | $+9.23 \cdot 10^{+05}$ | 1      |
| 82 | offset_p38ges_100504_111027b     | -5             | +5.9732        | +9             | 1   | $+9.40 \cdot 10^{+05}$ | 1      |
| 83 | offset_p38ges_100628b_111027b    | -5             | +5.8417        | +9             | 1   | $+6.95 \cdot 10^{+05}$ | 1      |
| 84 | p38_act_basal                    | -5             | -3.8209        | +3             | 1   | $+1.51 \cdot 10^{-04}$ | 1      |
| 85 | p38_act_il1b                     | -5             | -2.0419        | +3             | 1   | $+9.08 \cdot 10^{-03}$ | 1      |
| 86 | p38_dea_const                    | -5             | -5.0000        | +3             | 1   | $+1.00 \cdot 10^{-05}$ | 1      |
| 87 | p38_dea_mkp                      | -5             | +1.4912        | +3             | 1   | $+3.10 \cdot 10^{+01}$ | 1      |
| 88 | scale_BSA_MK2_total              | -5             | +8.2940        | +1e+01         | 1   | $+1.97 \cdot 10^{+08}$ | 1      |
| 89 | scale_BSA_p38_total              | -5             | +8.2408        | +1e+01         | 1   | $+1.74 \cdot 10^{+08}$ | 1      |
| 90 | scale_MK2ges_100421_111026a      | -5             | +6.1569        | +9             | 1   | $+1.44 \cdot 10^{+06}$ | 1      |
| 91 | scale_MK2ges_100504_111027a      | -5             | +6.1416        | +9             | 1   | $+1.39 \cdot 10^{+06}$ | 1      |
| 92 | scale_MK2ges_100504_111027b      | -5             | +6.0297        | +9             | 1   | $+1.07 \cdot 10^{+06}$ | 1      |
| 93 | scale_MK2ges_100628b_111027b     | -5             | +6.1468        | +9             | 1   | $+1.40 \cdot 10^{+06}$ | 1      |
| 94 | scale_cal_intstd_MK2_total       | -5             | +4.8905        | +8             | 1   | $+7.77 \cdot 10^{+04}$ | 1      |
| 95 | scale_cal_intstd_p38_total       | -5             | +4.8289        | +8             | 1   | $+6.74 \cdot 10^{+04}$ | 1      |
| 96 | scale_cal_intstd_pMK2            | -5             | +5.0035        | +8             | 1   | $+1.01 \cdot 10^{+05}$ | 1      |
| 97 | scale_cal_intstd_pp38            | -5             | +4.5826        | +8             | 1   | $+3.82 \cdot 10^{+04}$ | 1      |
| 98 | scale_p38ges_100421_111026a      | -5             | +6.2895        | +9             | 1   | $+1.95 \cdot 10^{+06}$ | 1      |
| 99 | scale_p38ges_100504_111027a      | -5             | +5.5923        | +9             | 1   | $+3.91 \cdot 10^{+05}$ | 1      |

**Table 63: Estimated parameter values**

$\hat{\theta}$  indicates the estimated value of the parameters.  $\theta_{min}$  and  $\theta_{max}$  indicate the upper and lower bounds for the parameters. The log-column indicates if the value of a parameter was log-transformed. If log = 1 the non-log-column indicates the non-logarithmic value of the estimate. The fitted-column indicates if the parameter value was estimated (1), was temporarily fixed (0) or if its value was fixed to a constant value (2).

|     | name                         | $\theta_{min}$ | $\hat{\theta}$ | $\theta_{max}$ | log | non-log $\hat{\theta}$ | fitted |
|-----|------------------------------|----------------|----------------|----------------|-----|------------------------|--------|
| 100 | scale_p38ges_100504_111027b  | -5             | +6.1938        | +9             | 1   | $+1.56 \cdot 10^{+06}$ | 1      |
| 101 | scale_p38ges_100628b_111027b | -5             | +6.2118        | +9             | 1   | $+1.63 \cdot 10^{+06}$ | 1      |
| 102 | scale_pMK2_090102            | -5             | +5.9869        | +9             | 1   | $+9.70 \cdot 10^{+05}$ | 1      |
| 103 | scale_pMK2_090615d_090922a   | -5             | +5.8836        | +9             | 1   | $+7.65 \cdot 10^{+05}$ | 1      |
| 104 | scale_pMK2_090615d_090922b   | -5             | +5.9805        | +9             | 1   | $+9.56 \cdot 10^{+05}$ | 1      |
| 105 | scale_pMK2_090615d_090922d   | -5             | +5.7743        | +9             | 1   | $+5.95 \cdot 10^{+05}$ | 1      |
| 106 | scale_pMK2_090615d_100416    | -5             | +6.6219        | +9             | 1   | $+4.19 \cdot 10^{+06}$ | 1      |
| 107 | scale_pMK2_090615d_110419    | -5             | +6.0065        | +9             | 1   | $+1.02 \cdot 10^{+06}$ | 1      |
| 108 | scale_pMK2_100241_100428     | -5             | +6.3780        | +9             | 1   | $+2.39 \cdot 10^{+06}$ | 1      |
| 109 | scale_pMK2_100241_100430     | -5             | +5.8056        | +9             | 1   | $+6.39 \cdot 10^{+05}$ | 1      |
| 110 | scale_pMK2_100241_100505     | -5             | +6.5593        | +9             | 1   | $+3.62 \cdot 10^{+06}$ | 1      |
| 111 | scale_pMK2_100504_100512     | -5             | +6.6680        | +9             | 1   | $+4.66 \cdot 10^{+06}$ | 1      |
| 112 | scale_pMK2_100504_100520     | -5             | +6.8758        | +9             | 1   | $+7.51 \cdot 10^{+06}$ | 1      |
| 113 | scale_pMK2_100504_100527     | -5             | +6.8767        | +9             | 1   | $+7.53 \cdot 10^{+06}$ | 1      |
| 114 | scale_pMK2_100517_100610a    | -5             | +6.4660        | +9             | 1   | $+2.92 \cdot 10^{+06}$ | 1      |
| 115 | scale_pMK2_100517_100610b    | -5             | +6.4214        | +9             | 1   | $+2.64 \cdot 10^{+06}$ | 1      |
| 116 | scale_pMK2_100628b_100727    | -5             | +6.7724        | +9             | 1   | $+5.92 \cdot 10^{+06}$ | 1      |
| 117 | scale_pMK2_100628b_100728a   | -5             | +6.6019        | +9             | 1   | $+4.00 \cdot 10^{+06}$ | 1      |
| 118 | scale_pMK2_100628b_100728b   | -5             | +6.6866        | +9             | 1   | $+4.86 \cdot 10^{+06}$ | 1      |
| 119 | scale_pMK2_101029_101103     | -5             | +6.6395        | +9             | 1   | $+4.36 \cdot 10^{+06}$ | 1      |
| 120 | scale_pMK2_101029_101104     | -5             | +6.5813        | +9             | 1   | $+3.81 \cdot 10^{+06}$ | 1      |
| 121 | scale_pMK2_110317a_110406a   | -5             | +6.0628        | +9             | 1   | $+1.16 \cdot 10^{+06}$ | 1      |
| 122 | scale_pMK2_110317b_110405a   | -5             | +6.2476        | +9             | 1   | $+1.77 \cdot 10^{+06}$ | 1      |
| 123 | scale_pMK2_110317b_110405b   | -5             | +5.9571        | +9             | 1   | $+9.06 \cdot 10^{+05}$ | 1      |
| 124 | scale_pMK2_121024_wb121029   | -5             | +6.5813        | +9             | 1   | $+3.81 \cdot 10^{+06}$ | 1      |
| 125 | scale_pMK2_121031A_wb121105  | -5             | +6.6357        | +9             | 1   | $+4.32 \cdot 10^{+06}$ | 1      |
| 126 | scale_pMK2_121031B_wb121105  | -5             | +6.2600        | +9             | 1   | $+1.82 \cdot 10^{+06}$ | 1      |
| 127 | scale_pMK2_121114A_wb121119  | -5             | +6.0932        | +9             | 1   | $+1.24 \cdot 10^{+06}$ | 1      |
| 128 | scale_pMK2_121114B_wb121119  | -5             | +6.1227        | +9             | 1   | $+1.33 \cdot 10^{+06}$ | 1      |
| 129 | scale_pp38_090615d_090922a   | -5             | +6.9452        | +9             | 1   | $+8.82 \cdot 10^{+06}$ | 1      |
| 130 | scale_pp38_090615d_090922b   | -5             | +6.7429        | +9             | 1   | $+5.53 \cdot 10^{+06}$ | 1      |
| 131 | scale_pp38_090615d_090922d   | -5             | +6.7266        | +9             | 1   | $+5.33 \cdot 10^{+06}$ | 1      |
| 132 | scale_pp38_090615d_100416    | -5             | +7.8390        | +9             | 1   | $+6.90 \cdot 10^{+07}$ | 1      |
| 133 | scale_pp38_090615d_110419    | -5             | +6.9813        | +9             | 1   | $+9.58 \cdot 10^{+06}$ | 1      |
| 134 | scale_pp38_100241_100428     | -5             | +7.3757        | +9             | 1   | $+2.37 \cdot 10^{+07}$ | 1      |
| 135 | scale_pp38_100241_100430     | -5             | +7.0507        | +9             | 1   | $+1.12 \cdot 10^{+07}$ | 1      |
| 136 | scale_pp38_100241_100505     | -5             | +7.2076        | +9             | 1   | $+1.61 \cdot 10^{+07}$ | 1      |
| 137 | scale_pp38_100504_100512     | -5             | +7.3637        | +9             | 1   | $+2.31 \cdot 10^{+07}$ | 1      |
| 138 | scale_pp38_100504_100520     | -5             | +7.0163        | +9             | 1   | $+1.04 \cdot 10^{+07}$ | 1      |
| 139 | scale_pp38_100504_100527     | -5             | +6.9793        | +9             | 1   | $+9.53 \cdot 10^{+06}$ | 1      |
| 140 | scale_pp38_100517_100610a    | -5             | +6.9269        | +9             | 1   | $+8.45 \cdot 10^{+06}$ | 1      |
| 141 | scale_pp38_100517_100610b    | -5             | +6.9269        | +9             | 1   | $+8.45 \cdot 10^{+06}$ | 1      |
| 142 | scale_pp38_100628b_100727    | -5             | +7.1609        | +9             | 1   | $+1.45 \cdot 10^{+07}$ | 1      |
| 143 | scale_pp38_100628b_100728a   | -5             | +6.9837        | +9             | 1   | $+9.63 \cdot 10^{+06}$ | 1      |
| 144 | scale_pp38_100628b_100728b   | -5             | +6.9623        | +9             | 1   | $+9.17 \cdot 10^{+06}$ | 1      |
| 145 | scale_pp38_100708_100715     | -5             | +6.4940        | +9             | 1   | $+3.12 \cdot 10^{+06}$ | 1      |
| 146 | scale_pp38_101029_101103     | -5             | +7.1991        | +9             | 1   | $+1.58 \cdot 10^{+07}$ | 1      |
| 147 | scale_pp38_101029_101104     | -5             | +6.9070        | +9             | 1   | $+8.07 \cdot 10^{+06}$ | 1      |
| 148 | scale_pp38_110317a_110406a   | -5             | +6.8557        | +9             | 1   | $+7.17 \cdot 10^{+06}$ | 1      |
| 149 | scale_pp38_110317b_110405a   | -5             | +7.2734        | +9             | 1   | $+1.88 \cdot 10^{+07}$ | 1      |

**Table 64: Estimated parameter values**

$\hat{\theta}$  indicates the estimated value of the parameters.  $\theta_{min}$  and  $\theta_{max}$  indicate the upper and lower bounds for the parameters. The log-column indicates if the value of a parameter was log-transformed. If log = 1 the non-log-column indicates the non-logarithmic value of the estimate. The fitted-column indicates if the parameter value was estimated (1), was temporarily fixed (0) or if its value was fixed to a constant value (2).

|     | name                        | $\theta_{min}$ | $\hat{\theta}$ | $\theta_{max}$ | log | non-log $\hat{\theta}$ | fitted |
|-----|-----------------------------|----------------|----------------|----------------|-----|------------------------|--------|
| 150 | scale_pp38_110317b_110405b  | -5             | +7.2052        | +9             | 1   | $+1.60 \cdot 10^{+07}$ | 1      |
| 151 | scale_pp38_121024_wb121029  | -5             | +7.9772        | +9             | 1   | $+9.49 \cdot 10^{+07}$ | 1      |
| 152 | scale_pp38_121031A_wb121105 | -5             | +6.9491        | +9             | 1   | $+8.89 \cdot 10^{+06}$ | 1      |
| 153 | scale_pp38_121031B_wb121105 | -5             | +7.0796        | +9             | 1   | $+1.20 \cdot 10^{+07}$ | 1      |
| 154 | scale_pp38_121114A_wb121119 | -5             | +6.7596        | +9             | 1   | $+5.75 \cdot 10^{+06}$ | 1      |
| 155 | scale_pp38_121114B_wb121119 | -5             | +6.6267        | +9             | 1   | $+4.23 \cdot 10^{+06}$ | 1      |
| 156 | sd_BSA_MK2_total            | -5             | -1.4565        | +9             | 1   | $+3.50 \cdot 10^{-02}$ | 1      |
| 157 | sd_BSA_p38_total            | -5             | -1.9507        | +8             | 1   | $+1.12 \cdot 10^{-02}$ | 1      |
| 158 | sd_MK2ges_au                | -5             | -1.3331        | +3             | 1   | $+4.64 \cdot 10^{-02}$ | 1      |
| 159 | sd_cal_intstd_MK2_total     | -5             | -1.0420        | +8             | 1   | $+9.08 \cdot 10^{-02}$ | 1      |
| 160 | sd_cal_intstd_p38_total     | -5             | -1.4556        | +8             | 1   | $+3.50 \cdot 10^{-02}$ | 1      |
| 161 | sd_cal_intstd_pMK2          | -5             | -1.4382        | +8             | 1   | $+3.65 \cdot 10^{-02}$ | 1      |
| 162 | sd_cal_intstd_pp38          | -5             | -1.8602        | +8             | 1   | $+1.38 \cdot 10^{-02}$ | 1      |
| 163 | sd_p38ges_au                | -5             | -1.4311        | +3             | 1   | $+3.71 \cdot 10^{-02}$ | 1      |
| 164 | sd_pMK2_au                  | -5             | -0.9498        | +3             | 1   | $+1.12 \cdot 10^{-01}$ | 1      |
| 165 | sd_pMK2_mk2ko_au            | -5             | -0.5016        | +3             | 1   | $+3.15 \cdot 10^{-01}$ | 1      |
| 166 | sd_pMK2_phosphaInh_au       | -5             | -0.9227        | +3             | 1   | $+1.19 \cdot 10^{-01}$ | 1      |
| 167 | sd_pp38_au                  | -5             | -0.8357        | +3             | 1   | $+1.46 \cdot 10^{-01}$ | 1      |
| 168 | sd_pp38_mk2ko_au            | -5             | -0.6998        | +3             | 1   | $+2.00 \cdot 10^{-01}$ | 1      |
| 169 | sd_pp38_phosphaInh_au       | -5             | -0.8048        | +3             | 1   | $+1.57 \cdot 10^{-01}$ | 1      |

**Table 65: Estimated parameter values**

$\hat{\theta}$  indicates the estimated value of the parameters.  $\theta_{min}$  and  $\theta_{max}$  indicate the upper and lower bounds for the parameters. The log-column indicates if the value of a parameter was log-transformed. If log = 1 the non-log-column indicates the non-logarithmic value of the estimate. The fitted-column indicates if the parameter value was estimated (1), was temporarily fixed (0) or if its value was fixed to a constant value (2).



**Figure 39: Overview of the profile likelihood of the model parameters**  
 The solid lines indicate the profile likelihood. The broken lines indicate the threshold to assess confidence intervals. The asterisk indicate the optimal parameter values.

## 2.4 Profile likelihood of model parameters

In order to evaluate the identifiability of the model parameters and to assess confidence intervals the profile likelihood [2] was calculated. The mean calculation time of the profile likelihood per parameter was  $00:02:26.04 \pm 00:02:11.02$ . An overview for the dynamic model parameters is displayed in Figure 39.

|    | name                            | $\hat{\theta}$ | $\sigma^-$ | $\sigma^+$ |
|----|---------------------------------|----------------|------------|------------|
| 1  | V                               | -0.036         | -0.523     | +0.452     |
| 2  | conc_MK2ges_kalibrator          | -0.515         | -0.617     | -0.417     |
| 3  | conc_p38ges_kalibrator          | +0.199         | +0.169     | +0.229     |
| 4  | dePhospho_inh                   | -2.164         | -2.366     | -1.929     |
| 5  | il1b_sat                        | -0.281         | -0.422     | -0.137     |
| 6  | init_MK2                        | +0.658         | +0.089     | +1.304     |
| 7  | init_p38                        | -0.446         | -0.942     | +0.051     |
| 8  | intstd_pro_MK2gesKalibrator     | +0.077         | -0.414     | +0.348     |
| 9  | intstd_pro_p38gesKalibrator     | +1.900         | +1.776     | +1.972     |
| 10 | intstd_pro_pMK2Kalibrator       | +0.425         | +0.315     | +0.543     |
| 11 | intstd_pro_pp38Kalibrator       | +1.743         | +1.667     | +1.833     |
| 12 | mk2_act_p38                     | +1.007         | +0.388     | +1.611     |
| 13 | mk2_dea                         | -0.146         | -0.380     | +0.356     |
| 14 | mk2_inh_sb                      | +0.011         | -0.260     | +0.288     |
| 15 | mkp_prod_pp38                   | -2.075         | -2.205     | -1.949     |
| 16 | offset_BSA_MK2ges               | +7.510         | +7.375     | +7.624     |
| 17 | offset_BSA_p38ges               | +7.584         | +7.549     | +7.617     |
| 18 | offset_MK2ges_100421_111026a    | +6.017         | +5.931     | +6.097     |
| 19 | offset_MK2ges_100504_111027a    | +6.024         | +5.936     | +6.107     |
| 20 | offset_MK2ges_100504_111027b    | +6.034         | +5.952     | +6.111     |
| 21 | offset_MK2ges_100628b_111027b   | +6.057         | +5.973     | +6.135     |
| 22 | offset_gel_pMK2_090102          | +4.290         | +3.437     | +4.641     |
| 23 | offset_gel_pMK2_090615d_090922a | +4.409         | +3.952     | +4.709     |
| 24 | offset_gel_pMK2_090615d_090922b | +4.430         | +3.915     | +4.742     |
| 25 | offset_gel_pMK2_090615d_090922d | +4.495         | +4.160     | +4.748     |
| 26 | offset_gel_pMK2_090615d_100416  | -5.000         | -Inf       | +4.024     |
| 27 | offset_gel_pMK2_090615d_110419  | -5.000         | -Inf       | +2.985     |
| 28 | offset_gel_pMK2_100241_100428   | +5.830         | +5.732     | +5.921     |
| 29 | offset_gel_pMK2_100241_100430   | -5.000         | -Inf       | +3.093     |

**Table 66: Confidence intervals for the estimated parameter values derived by the profile likelihood**  
 $\hat{\theta}$  indicates the estimated optimal parameter value.  $\sigma^-$  and  $\sigma^+$  indicate 95% point-wise confidence intervals.

## 2.5 Confidence intervals for the model parameters

In Table 66 – 71, 95% confidence intervals for the estimated parameter values derived by the profile likelihood [2] are given.

|    | name                             | $\hat{\theta}$ | $\sigma^-$ | $\sigma^+$ |
|----|----------------------------------|----------------|------------|------------|
| 30 | offset_gel_pMK2_100241_100505    | +5.847         | +5.744     | +5.942     |
| 31 | offset_gel_pMK2_100504_100512    | +5.766         | +5.667     | +5.854     |
| 32 | offset_gel_pMK2_100504_100520    | +5.917         | +5.812     | +6.009     |
| 33 | offset_gel_pMK2_100504_100527    | +5.880         | +5.769     | +5.976     |
| 34 | offset_gel_pMK2_100517_100610a   | +5.899         | +5.840     | +5.952     |
| 35 | offset_gel_pMK2_100517_100610b   | +5.995         | +5.941     | +6.045     |
| 36 | offset_gel_pMK2_100628b_100727   | +5.986         | +5.887     | +6.072     |
| 37 | offset_gel_pMK2_100628b_100728a  | +5.911         | +5.817     | +5.992     |
| 38 | offset_gel_pMK2_100628b_100728b  | +5.844         | +5.740     | +5.933     |
| 39 | offset_gel_pMK2_101029_101103    | +5.714         | +5.633     | +5.786     |
| 40 | offset_gel_pMK2_101029_101104    | +5.799         | +5.725     | +5.865     |
| 41 | offset_gel_pMK2_110317a_110406a  | +3.015         | +2.904     | +3.125     |
| 42 | offset_gel_pMK2_110317b_110405a  | +3.096         | +2.991     | +3.201     |
| 43 | offset_gel_pMK2_110317b_110405b  | +2.848         | +2.743     | +2.953     |
| 44 | offset_gel_pMK2_121024_wb121029  | +3.828         | -Inf       | +4.834     |
| 45 | offset_gel_pMK2_121031A_wb121105 | +5.704         | +5.413     | +5.923     |
| 46 | offset_gel_pMK2_121031B_wb121105 | +4.955         | +4.554     | +5.224     |
| 47 | offset_gel_pMK2_121114A_wb121119 | +5.236         | +4.991     | +5.428     |
| 48 | offset_gel_pMK2_121114B_wb121119 | +5.316         | +5.091     | +5.497     |
| 49 | offset_gel_pp38_090615d_090922a  | -5.000         | -Inf       | +3.948     |
| 50 | offset_gel_pp38_090615d_090922b  | -5.000         | -Inf       | +3.553     |
| 51 | offset_gel_pp38_090615d_090922d  | -4.991         | -Inf       | +4.231     |
| 52 | offset_gel_pp38_090615d_100416   | +5.149         | -Inf       | +5.525     |
| 53 | offset_gel_pp38_090615d_110419   | -5.000         | -Inf       | +4.056     |
| 54 | offset_gel_pp38_100241_100428    | +5.722         | +5.561     | +5.864     |
| 55 | offset_gel_pp38_100241_100430    | +5.725         | +5.594     | +5.844     |
| 56 | offset_gel_pp38_100241_100505    | +5.685         | +5.542     | +5.813     |
| 57 | offset_gel_pp38_100504_100512    | +5.603         | +5.441     | +5.733     |
| 58 | offset_gel_pp38_100504_100520    | +5.808         | +5.702     | +5.900     |
| 59 | offset_gel_pp38_100504_100527    | +5.786         | +5.690     | +5.869     |

**Table 67: Confidence intervals for the estimated parameter values derived by the profile likelihood**  $\hat{\theta}$  indicates the estimated optimal parameter value.  $\sigma^-$  and  $\sigma^+$  indicate 95% point-wise confidence intervals.

|    | name                             | $\hat{\theta}$ | $\sigma^-$ | $\sigma^+$ |
|----|----------------------------------|----------------|------------|------------|
| 60 | offset_gel_pp38_100517_100610a   | +5.760         | +5.692     | +5.822     |
| 61 | offset_gel_pp38_100517_100610b   | +5.760         | +5.692     | +5.822     |
| 62 | offset_gel_pp38_100628b_100727   | +5.776         | +5.661     | +5.873     |
| 63 | offset_gel_pp38_100628b_100728a  | +5.714         | +5.605     | +5.805     |
| 64 | offset_gel_pp38_100628b_100728b  | +5.722         | +5.618     | +5.810     |
| 65 | offset_gel_pp38_100708_100715    | +5.721         | +5.594     | +5.818     |
| 66 | offset_gel_pp38_101029_101103    | +5.727         | +5.619     | +5.825     |
| 67 | offset_gel_pp38_101029_101104    | +4.429         | +4.061     | +4.634     |
| 68 | offset_gel_pp38_110317a_110406a  | +4.061         | -Inf       | +4.633     |
| 69 | offset_gel_pp38_110317b_110405a  | +4.306         | -Inf       | +4.856     |
| 70 | offset_gel_pp38_110317b_110405b  | +4.331         | -Inf       | +4.821     |
| 71 | offset_gel_pp38_121024_wb121029  | +6.052         | +5.643     | +6.327     |
| 72 | offset_gel_pp38_121031A_wb121105 | +5.069         | +4.665     | +5.346     |
| 73 | offset_gel_pp38_121031B_wb121105 | +5.337         | +5.005     | +5.588     |
| 74 | offset_gel_pp38_121114A_wb121119 | +4.938         | +4.602     | +5.190     |
| 75 | offset_gel_pp38_121114B_wb121119 | +5.149         | +4.890     | +5.364     |
| 76 | offset_kal_intstd_MK2ges         | +5.791         | +5.616     | +5.937     |
| 77 | offset_kal_intstd_p38ges         | +5.494         | +5.401     | +5.591     |
| 78 | offset_kal_intstd_pMK2           | +5.633         | +5.534     | +5.718     |
| 79 | offset_kal_intstd_pp38           | +5.753         | +5.724     | +5.777     |
| 80 | offset_p38ges_100421_111026a     | +6.047         | +5.975     | +6.114     |
| 81 | offset_p38ges_100504_111027a     | +5.965         | +5.910     | +6.017     |
| 82 | offset_p38ges_100504_111027b     | +5.973         | +5.901     | +6.042     |
| 83 | offset_p38ges_100628b_111027b    | +5.842         | +5.766     | +5.913     |
| 84 | p38_act_basal                    | -3.821         | -4.037     | -3.615     |
| 85 | p38_act_il1b                     | -2.042         | -2.199     | -1.896     |
| 86 | p38_dea_const                    | -5.000         | -Inf       | -2.567     |
| 87 | p38_dea_mkp                      | +1.491         | +0.980     | +2.002     |
| 88 | scale_BSA_MK2ges                 | +8.294         | +8.243     | +8.342     |
| 89 | scale_BSA_p38ges                 | +8.241         | +8.224     | +8.257     |

**Table 68: Confidence intervals for the estimated parameter values derived by the profile likelihood**  $\hat{\theta}$  indicates the estimated optimal parameter value.  $\sigma^-$  and  $\sigma^+$  indicate 95% point-wise confidence intervals.

|     | name                         | $\hat{\theta}$ | $\sigma^-$ | $\sigma^+$ |
|-----|------------------------------|----------------|------------|------------|
| 90  | scale_MK2ges_100421_111026a  | +6.157         | +6.071     | +6.230     |
| 91  | scale_MK2ges_100504_111027a  | +6.142         | +6.042     | +6.223     |
| 92  | scale_MK2ges_100504_111027b  | +6.030         | +5.914     | +6.122     |
| 93  | scale_MK2ges_100628b_111027b | +6.147         | +6.050     | +6.228     |
| 94  | scale_kal_intstd_MK2ges      | +4.891         | +4.666     | +5.056     |
| 95  | scale_kal_intstd_p38ges      | +4.829         | +4.768     | +4.894     |
| 96  | scale_kal_intstd_pMK2        | +5.004         | +4.939     | +5.061     |
| 97  | scale_kal_intstd_pp38        | +4.583         | +4.546     | +4.618     |
| 98  | scale_p38ges_100421_111026a  | +6.289         | +6.229     | +6.344     |
| 99  | scale_p38ges_100504_111027a  | +5.592         | +5.426     | +5.717     |
| 100 | scale_p38ges_100504_111027b  | +6.194         | +6.128     | +6.252     |
| 101 | scale_p38ges_100628b_111027b | +6.212         | +6.159     | +6.260     |
| 102 | scale_pMK2_090102            | +5.987         | +5.747     | +6.453     |
| 103 | scale_pMK2_090615d_090922a   | +5.884         | +5.668     | +6.341     |
| 104 | scale_pMK2_090615d_090922b   | +5.980         | +5.767     | +6.438     |
| 105 | scale_pMK2_090615d_090922d   | +5.774         | +5.542     | +6.243     |
| 106 | scale_pMK2_090615d_100416    | +6.622         | +6.422     | +7.082     |
| 107 | scale_pMK2_090615d_110419    | +6.006         | +5.806     | +6.467     |
| 108 | scale_pMK2_100241_100428     | +6.378         | +6.120     | +6.841     |
| 109 | scale_pMK2_100241_100430     | +5.806         | +5.597     | +6.275     |
| 110 | scale_pMK2_100241_100505     | +6.559         | +6.327     | +7.022     |
| 111 | scale_pMK2_100504_100512     | +6.668         | +6.414     | +7.151     |
| 112 | scale_pMK2_100504_100520     | +6.876         | +6.624     | +7.359     |
| 113 | scale_pMK2_100504_100527     | +6.877         | +6.627     | +7.360     |
| 114 | scale_pMK2_100517_100610a    | +6.466         | +6.134     | +6.974     |
| 115 | scale_pMK2_100517_100610b    | +6.421         | +6.048     | +6.935     |
| 116 | scale_pMK2_100628b_100727    | +6.772         | +6.504     | +7.259     |
| 117 | scale_pMK2_100628b_100728a   | +6.602         | +6.315     | +7.092     |
| 118 | scale_pMK2_100628b_100728b   | +6.687         | +6.422     | +7.173     |
| 119 | scale_pMK2_101029_101103     | +6.639         | +6.383     | +7.124     |

**Table 69: Confidence intervals for the estimated parameter values derived by the profile likelihood**  $\hat{\theta}$  indicates the estimated optimal parameter value.  $\sigma^-$  and  $\sigma^+$  indicate 95% point-wise confidence intervals.

|     | name                        | $\hat{\theta}$ | $\sigma^-$ | $\sigma^+$ |
|-----|-----------------------------|----------------|------------|------------|
| 120 | scale_pMK2_101029_101104    | +6.581         | +6.314     | +7.067     |
| 121 | scale_pMK2_110317a_110406a  | +6.063         | +5.707     | +6.579     |
| 122 | scale_pMK2_110317b_110405a  | +6.248         | +5.892     | +6.764     |
| 123 | scale_pMK2_110317b_110405b  | +5.957         | +5.602     | +6.473     |
| 124 | scale_pMK2_121024_wb121029  | +6.581         | +6.350     | +7.069     |
| 125 | scale_pMK2_121031A_wb121105 | +6.636         | +6.371     | +7.112     |
| 126 | scale_pMK2_121031B_wb121105 | +6.260         | +6.023     | +6.741     |
| 127 | scale_pMK2_121114A_wb121119 | +6.093         | +5.830     | +6.570     |
| 128 | scale_pMK2_121114B_wb121119 | +6.123         | +5.858     | +6.599     |
| 129 | scale_pp38_090615d_090922a  | +6.945         | +6.805     | +7.099     |
| 130 | scale_pp38_090615d_090922b  | +6.743         | +6.603     | +6.897     |
| 131 | scale_pp38_090615d_090922d  | +6.727         | +6.582     | +6.881     |
| 132 | scale_pp38_090615d_100416   | +7.839         | +7.714     | +7.982     |
| 133 | scale_pp38_090615d_110419   | +6.981         | +6.859     | +7.123     |
| 134 | scale_pp38_100241_100428    | +7.376         | +7.230     | +7.530     |
| 135 | scale_pp38_100241_100430    | +7.051         | +6.870     | +7.221     |
| 136 | scale_pp38_100241_100505    | +7.208         | +7.053     | +7.366     |
| 137 | scale_pp38_100504_100512    | +7.364         | +7.196     | +7.532     |
| 138 | scale_pp38_100504_100520    | +7.016         | +6.729     | +7.239     |
| 139 | scale_pp38_100504_100527    | +6.979         | +6.723     | +7.193     |
| 140 | scale_pp38_100517_100610a   | +6.927         | +6.651     | +7.162     |
| 141 | scale_pp38_100517_100610b   | +6.927         | +6.651     | +7.162     |
| 142 | scale_pp38_100628b_100727   | +7.161         | +6.953     | +7.352     |
| 143 | scale_pp38_100628b_100728a  | +6.984         | +6.745     | +7.190     |
| 144 | scale_pp38_100628b_100728b  | +6.962         | +6.722     | +7.170     |
| 145 | scale_pp38_100708_100715    | +6.494         | +4.945     | +6.900     |
| 146 | scale_pp38_101029_101103    | +7.199         | +7.028     | +7.368     |
| 147 | scale_pp38_101029_101104    | +6.907         | +6.778     | +7.053     |
| 148 | scale_pp38_110317a_110406a  | +6.856         | +6.698     | +7.019     |
| 149 | scale_pp38_110317b_110405a  | +7.273         | +7.126     | +7.432     |

**Table 70: Confidence intervals for the estimated parameter values derived by the profile likelihood**  $\hat{\theta}$  indicates the estimated optimal parameter value.  $\sigma^-$  and  $\sigma^+$  indicate 95% point-wise confidence intervals.

|     | name                        | $\hat{\theta}$ | $\sigma^-$ | $\sigma^+$ |
|-----|-----------------------------|----------------|------------|------------|
| 150 | scale_pp38_110317b_110405b  | +7.205         | +7.058     | +7.364     |
| 151 | scale_pp38_121024_wb121029  | +7.977         | +7.776     | +8.167     |
| 152 | scale_pp38_121031A_wb121105 | +6.949         | +6.736     | +7.143     |
| 153 | scale_pp38_121031B_wb121105 | +7.080         | +6.848     | +7.280     |
| 154 | scale_pp38_121114A_wb121119 | +6.760         | +6.551     | +6.952     |
| 155 | scale_pp38_121114B_wb121119 | +6.627         | +6.318     | +6.851     |
| 156 | sd_BSA_MK2ges               | -1.456         | -1.639     | -1.203     |
| 157 | sd_BSA_p38ges               | -1.951         | -2.134     | -1.697     |
| 158 | sd_MK2ges_au                | -1.333         | -1.422     | -1.230     |
| 159 | sd_kal_intstd_MK2ges        | -1.042         | -1.285     | -0.767     |
| 160 | sd_kal_intstd_p38ges        | -1.456         | -1.647     | -1.167     |
| 161 | sd_kal_intstd_pMK2          | -1.438         | -1.623     | -1.176     |
| 162 | sd_kal_intstd_pp38          | -1.860         | -2.051     | -1.582     |
| 163 | sd_p38ges_au                | -1.431         | -1.521     | -1.327     |
| 164 | sd_pMK2_au                  | -0.950         | -0.975     | -0.924     |
| 165 | sd_pMK2_mk2ko_au            | -0.502         | -0.557     | -0.441     |
| 166 | sd_pMK2_phosphaInh_au       | -0.923         | -0.998     | -0.838     |
| 167 | sd_pp38_au                  | -0.836         | -0.860     | -0.810     |
| 168 | sd_pp38_mk2ko_au            | -0.700         | -0.748     | -0.648     |
| 169 | sd_pp38_phosphaInh_au       | -0.805         | -0.880     | -0.720     |

**Table 71: Confidence intervals for the estimated parameter values derived by the profile likelihood**  $\hat{\theta}$  indicates the estimated optimal parameter value.  $\sigma^-$  and  $\sigma^+$  indicate 95% point-wise confidence intervals.

|    | name                            | $\theta_{min}$ | $\hat{\theta}$ | $\theta_{max}$ | log | non-log $\hat{\theta}$ | fitted |
|----|---------------------------------|----------------|----------------|----------------|-----|------------------------|--------|
| 1  | V                               | -5             | -0.0355        | +3             | 1   | $+9.21 \cdot 10^{-01}$ | 1      |
| 2  | conc_MK2ges_kalibrator          | -5             | -0.5154        | +8             | 1   | $+3.05 \cdot 10^{-01}$ | 1      |
| 3  | conc_p38ges_kalibrator          | -5             | +0.1990        | +8             | 1   | $+1.58 \cdot 10^{+00}$ | 1      |
| 4  | illb_sat                        | -5             | -0.1761        | +3             | 1   | $+6.67 \cdot 10^{-01}$ | 1      |
| 5  | init_MK2                        | -5             | +0.9087        | +3             | 1   | $+8.10 \cdot 10^{+00}$ | 1      |
| 6  | init_p38                        | -5             | -0.4486        | +3             | 1   | $+3.56 \cdot 10^{-01}$ | 1      |
| 7  | intstd_pro_MK2gesKalibrator     | -5             | -0.1723        | +8             | 1   | $+6.73 \cdot 10^{-01}$ | 1      |
| 8  | intstd_pro_p38gesKalibrator     | -5             | +1.9015        | +8             | 1   | $+7.97 \cdot 10^{+01}$ | 1      |
| 9  | intstd_pro_pMK2Kalibrator       | -5             | +0.4163        | +8             | 1   | $+2.61 \cdot 10^{+00}$ | 1      |
| 10 | intstd_pro_pp38Kalibrator       | -5             | +1.7415        | +8             | 1   | $+5.51 \cdot 10^{+01}$ | 1      |
| 11 | mk2_act_p38                     | -5             | +0.6908        | +3             | 1   | $+4.91 \cdot 10^{+00}$ | 1      |
| 12 | mk2_dea                         | -5             | -0.1355        | +3             | 1   | $+7.32 \cdot 10^{-01}$ | 1      |
| 13 | mkp_prod_pp38                   | -5             | -2.0642        | +3             | 1   | $+8.63 \cdot 10^{-03}$ | 1      |
| 14 | offset_BSA_MK2ges               | -5             | +7.5103        | +1e+01         | 1   | $+3.24 \cdot 10^{+07}$ | 1      |
| 15 | offset_BSA_p38ges               | -5             | +7.5837        | +1e+01         | 1   | $+3.83 \cdot 10^{+07}$ | 1      |
| 16 | offset_MK2ges_100421_111026a    | -5             | +6.0165        | +9             | 1   | $+1.04 \cdot 10^{+06}$ | 1      |
| 17 | offset_MK2ges_100504_111027a    | -5             | +6.0246        | +9             | 1   | $+1.06 \cdot 10^{+06}$ | 1      |
| 18 | offset_MK2ges_100504_111027b    | -5             | +6.0340        | +9             | 1   | $+1.08 \cdot 10^{+06}$ | 1      |
| 19 | offset_MK2ges_100628b_111027b   | -5             | +6.0567        | +9             | 1   | $+1.14 \cdot 10^{+06}$ | 1      |
| 20 | offset_gel_pMK2_090102          | -5             | +4.3320        | +9             | 1   | $+2.15 \cdot 10^{+04}$ | 1      |
| 21 | offset_gel_pMK2_090615d_090922a | -5             | +4.4434        | +9             | 1   | $+2.78 \cdot 10^{+04}$ | 1      |
| 22 | offset_gel_pMK2_090615d_090922b | -5             | +4.4709        | +9             | 1   | $+2.96 \cdot 10^{+04}$ | 1      |
| 23 | offset_gel_pMK2_090615d_090922d | -5             | +4.5096        | +9             | 1   | $+3.23 \cdot 10^{+04}$ | 1      |
| 24 | offset_gel_pMK2_090615d_100416  | -5             | -5.0000        | +9             | 1   | $+1.00 \cdot 10^{-05}$ | 1      |

**Table 72: Estimated parameter values**

$\hat{\theta}$  indicates the estimated value of the parameters.  $\theta_{min}$  and  $\theta_{max}$  indicate the upper and lower bounds for the parameters. The log-column indicates if the value of a parameter was log-transformed. If log = 1 the non-log-column indicates the non-logarithmic value of the estimate. The fitted-column indicates if the parameter value was estimated (1), was temporarily fixed (0) or if its value was fixed to a constant value (2).

## 2.6 Multi-experiment fit without inhibitor experiments

In Figure 6 in the main part of this article we made quantitative predictions with the model to determine the effect of different inhibitors. For these prediction we used a parameter set which was obtained by a fit without the inhibitor experiments described in Section 2.2.26–2.2.32, since these experiments were used for validating the prediction. All other experiments were implemented like described in Section 2.

In total 137 parameters are estimated from the experimental data, yielding a value of the objective function  $-2\log(L) = -1843.76$  for a total of 1408 data points. The model parameter were estimated by maximum likelihood estimation applying the MATLAB lsqnonlin algorithm. In Table 72 – 77 the estimated parameter values are given. Parameters highlighted in red color indicate parameter values close to their bounds. The parameter name prefix init\_ indicates the initial value of a dynamic variable. The parameter name prefix offset\_ indicates a offset of the experimental data. The parameter name prefix scale\_ indicates a scaling factor of the experimental data. The parameter name prefix sd\_ indicates the magnitude of the measurement noise for a specific measurement.

|    | name                            | $\theta_{min}$ | $\hat{\theta}$ | $\theta_{max}$ | log | non-log $\hat{\theta}$ | fitted |
|----|---------------------------------|----------------|----------------|----------------|-----|------------------------|--------|
| 25 | offset_gel_pMK2_090615d_110419  | -5             | -5.0000        | +9             | 1   | $+1.00 \cdot 10^{-05}$ | 1      |
| 26 | offset_gel_pMK2_100241_100428   | -5             | +5.8363        | +9             | 1   | $+6.86 \cdot 10^{+05}$ | 1      |
| 27 | offset_gel_pMK2_100241_100430   | -5             | -5.0000        | +9             | 1   | $+1.00 \cdot 10^{-05}$ | 1      |
| 28 | offset_gel_pMK2_100241_100505   | -5             | +5.8573        | +9             | 1   | $+7.20 \cdot 10^{+05}$ | 1      |
| 29 | offset_gel_pMK2_100504_100512   | -5             | +5.7732        | +9             | 1   | $+5.93 \cdot 10^{+05}$ | 1      |
| 30 | offset_gel_pMK2_100504_100520   | -5             | +5.9229        | +9             | 1   | $+8.37 \cdot 10^{+05}$ | 1      |
| 31 | offset_gel_pMK2_100504_100527   | -5             | +5.8879        | +9             | 1   | $+7.72 \cdot 10^{+05}$ | 1      |
| 32 | offset_gel_pMK2_100517_100610a  | -5             | +5.9020        | +9             | 1   | $+7.98 \cdot 10^{+05}$ | 1      |
| 33 | offset_gel_pMK2_100517_100610b  | -5             | +5.9976        | +9             | 1   | $+9.95 \cdot 10^{+05}$ | 1      |
| 34 | offset_gel_pMK2_100628b_100727  | -5             | +5.9898        | +9             | 1   | $+9.77 \cdot 10^{+05}$ | 1      |
| 35 | offset_gel_pMK2_100628b_100728a | -5             | +5.9154        | +9             | 1   | $+8.23 \cdot 10^{+05}$ | 1      |
| 36 | offset_gel_pMK2_100628b_100728b | -5             | +5.8492        | +9             | 1   | $+7.07 \cdot 10^{+05}$ | 1      |
| 37 | offset_gel_pMK2_110317a_110406a | -5             | +3.0145        | +9             | 1   | $+1.03 \cdot 10^{+03}$ | 1      |
| 38 | offset_gel_pMK2_110317b_110405a | -5             | +3.0962        | +9             | 1   | $+1.25 \cdot 10^{+03}$ | 1      |
| 39 | offset_gel_pMK2_110317b_110405b | -5             | +2.8479        | +9             | 1   | $+7.05 \cdot 10^{+02}$ | 1      |
| 40 | offset_gel_pp38_090615d_090922a | -5             | -5.0000        | +9             | 1   | $+1.00 \cdot 10^{-05}$ | 1      |
| 41 | offset_gel_pp38_090615d_090922b | -5             | -5.0000        | +9             | 1   | $+1.00 \cdot 10^{-05}$ | 1      |
| 42 | offset_gel_pp38_090615d_090922d | -5             | -5.0000        | +9             | 1   | $+1.00 \cdot 10^{-05}$ | 1      |
| 43 | offset_gel_pp38_090615d_100416  | -5             | +5.1148        | +9             | 1   | $+1.30 \cdot 10^{+05}$ | 1      |
| 44 | offset_gel_pp38_090615d_110419  | -5             | -5.0000        | +9             | 1   | $+1.00 \cdot 10^{-05}$ | 1      |
| 45 | offset_gel_pp38_100241_100428   | -5             | +5.7109        | +9             | 1   | $+5.14 \cdot 10^{+05}$ | 1      |
| 46 | offset_gel_pp38_100241_100430   | -5             | +5.7172        | +9             | 1   | $+5.21 \cdot 10^{+05}$ | 1      |
| 47 | offset_gel_pp38_100241_100505   | -5             | +5.6817        | +9             | 1   | $+4.81 \cdot 10^{+05}$ | 1      |
| 48 | offset_gel_pp38_100504_100512   | -5             | +5.5770        | +9             | 1   | $+3.78 \cdot 10^{+05}$ | 1      |
| 49 | offset_gel_pp38_100504_100520   | -5             | +5.7941        | +9             | 1   | $+6.22 \cdot 10^{+05}$ | 1      |

**Table 73: Estimated parameter values**

$\hat{\theta}$  indicates the estimated value of the parameters.  $\theta_{min}$  and  $\theta_{max}$  indicate the upper and lower bounds for the parameters. The log-column indicates if the value of a parameter was log-transformed. If log = 1 the non-log-column indicates the non-logarithmic value of the estimate. The fitted-column indicates if the parameter value was estimated (1), was temporarily fixed (0) or if its value was fixed to a constant value (2).

|    | name                            | $\theta_{min}$ | $\hat{\theta}$ | $\theta_{max}$ | log | non-log $\hat{\theta}$ | fitted |
|----|---------------------------------|----------------|----------------|----------------|-----|------------------------|--------|
| 50 | offset_gel_pp38_100504_100527   | -5             | +5.7762        | +9             | 1   | $+5.97 \cdot 10^{+05}$ | 1      |
| 51 | offset_gel_pp38_100517_100610a  | -5             | +5.7544        | +9             | 1   | $+5.68 \cdot 10^{+05}$ | 1      |
| 52 | offset_gel_pp38_100517_100610b  | -5             | +5.7544        | +9             | 1   | $+5.68 \cdot 10^{+05}$ | 1      |
| 53 | offset_gel_pp38_100628b_100727  | -5             | +5.7679        | +9             | 1   | $+5.86 \cdot 10^{+05}$ | 1      |
| 54 | offset_gel_pp38_100628b_100728a | -5             | +5.7073        | +9             | 1   | $+5.10 \cdot 10^{+05}$ | 1      |
| 55 | offset_gel_pp38_100628b_100728b | -5             | +5.7172        | +9             | 1   | $+5.21 \cdot 10^{+05}$ | 1      |
| 56 | offset_gel_pp38_100708_100715   | -5             | +5.7012        | +9             | 1   | $+5.03 \cdot 10^{+05}$ | 1      |
| 57 | offset_gel_pp38_110317a_110406a | -5             | +3.9779        | +9             | 1   | $+9.50 \cdot 10^{+03}$ | 1      |
| 58 | offset_gel_pp38_110317b_110405a | -5             | +4.3273        | +9             | 1   | $+2.12 \cdot 10^{+04}$ | 1      |
| 59 | offset_gel_pp38_110317b_110405b | -5             | +4.3363        | +9             | 1   | $+2.17 \cdot 10^{+04}$ | 1      |
| 60 | offset_kal_intstd_MK2ges        | -5             | +5.8403        | +8             | 1   | $+6.92 \cdot 10^{+05}$ | 1      |
| 61 | offset_kal_intstd_p38ges        | -5             | +5.4935        | +8             | 1   | $+3.11 \cdot 10^{+05}$ | 1      |
| 62 | offset_kal_intstd_pMK2          | -5             | +5.6360        | +8             | 1   | $+4.33 \cdot 10^{+05}$ | 1      |
| 63 | offset_kal_intstd_pp38          | -5             | +5.7537        | +8             | 1   | $+5.67 \cdot 10^{+05}$ | 1      |
| 64 | offset_p38ges_100421_111026a    | -5             | +6.0465        | +9             | 1   | $+1.11 \cdot 10^{+06}$ | 1      |
| 65 | offset_p38ges_100504_111027a    | -5             | +5.9651        | +9             | 1   | $+9.23 \cdot 10^{+05}$ | 1      |
| 66 | offset_p38ges_100504_111027b    | -5             | +5.9732        | +9             | 1   | $+9.40 \cdot 10^{+05}$ | 1      |
| 67 | offset_p38ges_100628b_111027b   | -5             | +5.8417        | +9             | 1   | $+6.94 \cdot 10^{+05}$ | 1      |
| 68 | p38_act_basal                   | -5             | -3.7704        | +3             | 1   | $+1.70 \cdot 10^{-04}$ | 1      |
| 69 | p38_act_il1b                    | -5             | -1.9120        | +3             | 1   | $+1.22 \cdot 10^{-02}$ | 1      |
| 70 | p38_dea_const                   | -5             | -5.0000        | +3             | 1   | $+1.00 \cdot 10^{-05}$ | 1      |
| 71 | p38_dea_mkp                     | -5             | +1.4862        | +3             | 1   | $+3.06 \cdot 10^{+01}$ | 1      |
| 72 | scale_BSA_MK2ges                | -5             | +8.2940        | +1e+01         | 1   | $+1.97 \cdot 10^{+08}$ | 1      |
| 73 | scale_BSA_p38ges                | -5             | +8.2408        | +1e+01         | 1   | $+1.74 \cdot 10^{+08}$ | 1      |
| 74 | scale_MK2ges_100421_111026a     | -5             | +6.1602        | +9             | 1   | $+1.45 \cdot 10^{+06}$ | 1      |

**Table 74: Estimated parameter values**

$\hat{\theta}$  indicates the estimated value of the parameters.  $\theta_{min}$  and  $\theta_{max}$  indicate the upper and lower bounds for the parameters. The log-column indicates if the value of a parameter was log-transformed. If log = 1 the non-log-column indicates the non-logarithmic value of the estimate. The fitted-column indicates if the parameter value was estimated (1), was temporarily fixed (0) or if its value was fixed to a constant value (2).

|    | name                         | $\theta_{min}$ | $\hat{\theta}$ | $\theta_{max}$ | log | non-log $\hat{\theta}$ | fitted |
|----|------------------------------|----------------|----------------|----------------|-----|------------------------|--------|
| 75 | scale_MK2ges_100504_111027a  | -5             | +6.1439        | +9             | 1   | $+1.39 \cdot 10^{+06}$ | 1      |
| 76 | scale_MK2ges_100504_111027b  | -5             | +6.0320        | +9             | 1   | $+1.08 \cdot 10^{+06}$ | 1      |
| 77 | scale_MK2ges_100628b_111027b | -5             | +6.1495        | +9             | 1   | $+1.41 \cdot 10^{+06}$ | 1      |
| 78 | scale_kal_intstd_MK2ges      | -5             | +4.8516        | +8             | 1   | $+7.11 \cdot 10^{+04}$ | 1      |
| 79 | scale_kal_intstd_p38ges      | -5             | +4.8285        | +8             | 1   | $+6.74 \cdot 10^{+04}$ | 1      |
| 80 | scale_kal_intstd_pMK2        | -5             | +5.0046        | +8             | 1   | $+1.01 \cdot 10^{+05}$ | 1      |
| 81 | scale_kal_intstd_pp38        | -5             | +4.5825        | +8             | 1   | $+3.82 \cdot 10^{+04}$ | 1      |
| 82 | scale_p38ges_100421_111026a  | -5             | +6.2892        | +9             | 1   | $+1.95 \cdot 10^{+06}$ | 1      |
| 83 | scale_p38ges_100504_111027a  | -5             | +5.5919        | +9             | 1   | $+3.91 \cdot 10^{+05}$ | 1      |
| 84 | scale_p38ges_100504_111027b  | -5             | +6.1935        | +9             | 1   | $+1.56 \cdot 10^{+06}$ | 1      |
| 85 | scale_p38ges_100628b_111027b | -5             | +6.2115        | +9             | 1   | $+1.63 \cdot 10^{+06}$ | 1      |
| 86 | scale_pMK2_090102            | -5             | +6.2348        | +9             | 1   | $+1.72 \cdot 10^{+06}$ | 1      |
| 87 | scale_pMK2_090615d_090922a   | -5             | +6.1258        | +9             | 1   | $+1.34 \cdot 10^{+06}$ | 1      |
| 88 | scale_pMK2_090615d_090922b   | -5             | +6.2227        | +9             | 1   | $+1.67 \cdot 10^{+06}$ | 1      |
| 89 | scale_pMK2_090615d_090922d   | -5             | +6.0273        | +9             | 1   | $+1.06 \cdot 10^{+06}$ | 1      |
| 90 | scale_pMK2_090615d_100416    | -5             | +6.8723        | +9             | 1   | $+7.45 \cdot 10^{+06}$ | 1      |
| 91 | scale_pMK2_090615d_110419    | -5             | +6.2569        | +9             | 1   | $+1.81 \cdot 10^{+06}$ | 1      |
| 92 | scale_pMK2_100241_100428     | -5             | +6.6119        | +9             | 1   | $+4.09 \cdot 10^{+06}$ | 1      |
| 93 | scale_pMK2_100241_100430     | -5             | +6.0558        | +9             | 1   | $+1.14 \cdot 10^{+06}$ | 1      |
| 94 | scale_pMK2_100241_100505     | -5             | +6.7923        | +9             | 1   | $+6.20 \cdot 10^{+06}$ | 1      |
| 95 | scale_pMK2_100504_100512     | -5             | +6.9011        | +9             | 1   | $+7.96 \cdot 10^{+06}$ | 1      |
| 96 | scale_pMK2_100504_100520     | -5             | +7.1115        | +9             | 1   | $+1.29 \cdot 10^{+07}$ | 1      |
| 97 | scale_pMK2_100504_100527     | -5             | +7.1107        | +9             | 1   | $+1.29 \cdot 10^{+07}$ | 1      |
| 98 | scale_pMK2_100517_100610a    | -5             | +6.7011        | +9             | 1   | $+5.02 \cdot 10^{+06}$ | 1      |
| 99 | scale_pMK2_100517_100610b    | -5             | +6.6560        | +9             | 1   | $+4.53 \cdot 10^{+06}$ | 1      |

**Table 75: Estimated parameter values**

$\hat{\theta}$  indicates the estimated value of the parameters.  $\theta_{min}$  and  $\theta_{max}$  indicate the upper and lower bounds for the parameters. The log-column indicates if the value of a parameter was log-transformed. If log = 1 the non-log-column indicates the non-logarithmic value of the estimate. The fitted-column indicates if the parameter value was estimated (1), was temporarily fixed (0) or if its value was fixed to a constant value (2).

|     | name                       | $\theta_{min}$ | $\hat{\theta}$ | $\theta_{max}$ | log | non-log $\hat{\theta}$    | fitted |
|-----|----------------------------|----------------|----------------|----------------|-----|---------------------------|--------|
| 100 | scale_pMK2_100628b_100727  | -5             | +7.0085        | +9             | 1   | +1.02 · 10 <sup>+07</sup> | 1      |
| 101 | scale_pMK2_100628b_100728a | -5             | +6.8339        | +9             | 1   | +6.82 · 10 <sup>+06</sup> | 1      |
| 102 | scale_pMK2_100628b_100728b | -5             | +6.9200        | +9             | 1   | +8.32 · 10 <sup>+06</sup> | 1      |
| 103 | scale_pMK2_110317a_110406a | -5             | +6.3046        | +9             | 1   | +2.02 · 10 <sup>+06</sup> | 1      |
| 104 | scale_pMK2_110317b_110405a | -5             | +6.4894        | +9             | 1   | +3.09 · 10 <sup>+06</sup> | 1      |
| 105 | scale_pMK2_110317b_110405b | -5             | +6.1989        | +9             | 1   | +1.58 · 10 <sup>+06</sup> | 1      |
| 106 | scale_pp38_090615d_090922a | -5             | +6.9203        | +9             | 1   | +8.32 · 10 <sup>+06</sup> | 1      |
| 107 | scale_pp38_090615d_090922b | -5             | +6.7180        | +9             | 1   | +5.22 · 10 <sup>+06</sup> | 1      |
| 108 | scale_pp38_090615d_090922d | -5             | +6.7097        | +9             | 1   | +5.13 · 10 <sup>+06</sup> | 1      |
| 109 | scale_pp38_090615d_100416  | -5             | +7.8228        | +9             | 1   | +6.65 · 10 <sup>+07</sup> | 1      |
| 110 | scale_pp38_090615d_110419  | -5             | +6.9631        | +9             | 1   | +9.19 · 10 <sup>+06</sup> | 1      |
| 111 | scale_pp38_100241_100428   | -5             | +7.3503        | +9             | 1   | +2.24 · 10 <sup>+07</sup> | 1      |
| 112 | scale_pp38_100241_100430   | -5             | +7.0281        | +9             | 1   | +1.07 · 10 <sup>+07</sup> | 1      |
| 113 | scale_pp38_100241_100505   | -5             | +7.1786        | +9             | 1   | +1.51 · 10 <sup>+07</sup> | 1      |
| 114 | scale_pp38_100504_100512   | -5             | +7.3291        | +9             | 1   | +2.13 · 10 <sup>+07</sup> | 1      |
| 115 | scale_pp38_100504_100520   | -5             | +6.9982        | +9             | 1   | +9.96 · 10 <sup>+06</sup> | 1      |
| 116 | scale_pp38_100504_100527   | -5             | +6.9526        | +9             | 1   | +8.97 · 10 <sup>+06</sup> | 1      |
| 117 | scale_pp38_100517_100610a  | -5             | +6.9070        | +9             | 1   | +8.07 · 10 <sup>+06</sup> | 1      |
| 118 | scale_pp38_100517_100610b  | -5             | +6.9070        | +9             | 1   | +8.07 · 10 <sup>+06</sup> | 1      |
| 119 | scale_pp38_100628b_100727  | -5             | +7.1211        | +9             | 1   | +1.32 · 10 <sup>+07</sup> | 1      |
| 120 | scale_pp38_100628b_100728a | -5             | +6.9446        | +9             | 1   | +8.80 · 10 <sup>+06</sup> | 1      |
| 121 | scale_pp38_100628b_100728b | -5             | +6.9203        | +9             | 1   | +8.32 · 10 <sup>+06</sup> | 1      |
| 122 | scale_pp38_100708_100715   | -5             | +6.5461        | +9             | 1   | +3.52 · 10 <sup>+06</sup> | 1      |
| 123 | scale_pp38_110317a_110406a | -5             | +6.8041        | +9             | 1   | +6.37 · 10 <sup>+06</sup> | 1      |
| 124 | scale_pp38_110317b_110405a | -5             | +7.2159        | +9             | 1   | +1.64 · 10 <sup>+07</sup> | 1      |

**Table 76: Estimated parameter values**

$\hat{\theta}$  indicates the estimated value of the parameters.  $\theta_{min}$  and  $\theta_{max}$  indicate the upper and lower bounds for the parameters. The log-column indicates if the value of a parameter was log-transformed. If log = 1 the non-log-column indicates the non-logarithmic value of the estimate. The fitted-column indicates if the parameter value was estimated (1), was temporarily fixed (0) or if its value was fixed to a constant value (2).

|     | name                       | $\theta_{min}$ | $\hat{\theta}$ | $\theta_{max}$ | log | non-log $\hat{\theta}$    | fitted |
|-----|----------------------------|----------------|----------------|----------------|-----|---------------------------|--------|
| 125 | scale_pp38_110317b_110405b | -5             | +7.1489        | +9             | 1   | +1.41 · 10 <sup>+07</sup> | 1      |
| 126 | sd_BSA_MK2ges              | -5             | -1.4574        | +9             | 1   | +3.49 · 10 <sup>-02</sup> | 1      |
| 127 | sd_BSA_p38ges              | -5             | -1.9516        | +8             | 1   | +1.12 · 10 <sup>-02</sup> | 1      |
| 128 | sd_MK2ges_au               | -5             | -1.3342        | +3             | 1   | +4.63 · 10 <sup>-02</sup> | 1      |
| 129 | sd_kal_intstd_MK2ges       | -5             | -0.9796        | +8             | 1   | +1.05 · 10 <sup>-01</sup> | 1      |
| 130 | sd_kal_intstd_p38ges       | -5             | -1.4582        | +8             | 1   | +3.48 · 10 <sup>-02</sup> | 1      |
| 131 | sd_kal_intstd_pMK2         | -5             | -1.4415        | +8             | 1   | +3.62 · 10 <sup>-02</sup> | 1      |
| 132 | sd_kal_intstd_pp38         | -5             | -1.8626        | +8             | 1   | +1.37 · 10 <sup>-02</sup> | 1      |
| 133 | sd_p38ges_au               | -5             | -1.4321        | +3             | 1   | +3.70 · 10 <sup>-02</sup> | 1      |
| 134 | sd_pMK2_au                 | -5             | -0.9382        | +3             | 1   | +1.15 · 10 <sup>-01</sup> | 1      |
| 135 | sd_pMK2_mk2ko_au           | -5             | -0.5025        | +3             | 1   | +3.14 · 10 <sup>-01</sup> | 1      |
| 136 | sd_pp38_au                 | -5             | -0.8710        | +3             | 1   | +1.35 · 10 <sup>-01</sup> | 1      |
| 137 | sd_pp38_mk2ko_au           | -5             | -0.7018        | +3             | 1   | +1.99 · 10 <sup>-01</sup> | 1      |

**Table 77: Estimated parameter values**

$\hat{\theta}$  indicates the estimated value of the parameters.  $\theta_{min}$  and  $\theta_{max}$  indicate the upper and lower bounds for the parameters. The log-column indicates if the value of a parameter was log-transformed. If log = 1 the non-log-column indicates the non-logarithmic value of the estimate. The fitted-column indicates if the parameter value was estimated (1), was temporarily fixed (0) or if its value was fixed to a constant value (2).

## References

- [1] AC Hindmarsh, PN Brown, KE Grant, SL Lee, R Serban, DE Shumaker, and CS Woodward. SUNDIALS: Suite of nonlinear and differential/algebraic equation solvers. *ACM T Math Software*, 31(3):363–396, 2005.
- [2] A Raue, C Kreutz, T Maiwald, J Bachmann, M Schilling, U Klingmüller, and J Timmer. Structural and practical identifiability analysis of partially observed dynamical models by exploiting the profile likelihood. *Bioinformatics*, 25(15):1923–1929, 2009.
- [3] A Raue, M Schilling, J Bachmann, A Matteson, M Schelker, D Kaschek, S Hug, C Kreutz, BD Harms, F Theis, U Klingmüller, and J Timmer. Lessons learned from quantitative dynamical modeling in systems biology. *PLOS ONE*, 8(9):e74335, 2013.
